# Supplementary material for: Cu(ii)/DM-Segphos catalyzed asymmetric 1,3-dipolar cycloaddition of benzoisothiazole-2,2-dioxide-3-ylidenes and azomethine ylides
Source: Royal Society of Chemistry journal article supplement (doi:10.1039/c6ra26543j), 2017-01-01
Supplement: c6ra26543j1.pdf [file c6ra26543j1.pdf]

## ***Supporting Information***

# **Cu(II)/DM-Segphos catalyzed asymmetric 1,3-dipolar cycloaddition of benzoisothiazole-2,2-dioxide-3-ylidenes and azomethine ylides**

*Feifei Li, Guorui Cao, Yanfeng Gao, Dawei Teng \**

*College of Chemical Engineering, Qingdao University of Science and Technology, 53 Zhengzhou Lu, Qingdao 266042, China*

## **Table of Contents**

|                                                                                                  |         |
|--------------------------------------------------------------------------------------------------|---------|
| 1. General.....                                                                                  | S2      |
| 2. General procedure for the preparation of spiropyrrolidinyl-benzoisothiazolines <b>3</b> ..... | S2      |
| 3. X-ray structure of <b>3m</b> .....                                                            | S2      |
| 4. Characterization data and spectra of compound <b>3a-t</b> .....                               | S3-S32  |
| 5. Chiral HPLC chromatograms of compound <b>3a-t</b> .....                                       | S33-S72 |

## General

All the reagents were purchased from TCI chemicals and local suppliers and used without purification. The starting materials (**1a-i**) were prepared following our previous paper.<sup>1</sup> All reactions were monitored by TLC. Chromatography refers to open column chromatography on silica gel (100-200 mesh).

<sup>1</sup>H NMR spectra were recorded on 500 MHz and <sup>13</sup>C NMR spectra were recorded on 125 MHz by using a Bruker Avance 500M spectrometer. Chemical shifts were reported in parts per million ( $\delta$ ) relative to tetramethylsilane (TMS). Mass spectra were performed on an Ultima Global spectrometer with an ESI source. The X-ray single-crystal diffraction was performed on Saturn 724+ instrument. Optical rotations were measured on SGW-1 automatic polarimeter and reported as follows:  $[\alpha]_D^{25}$  (c g/100 mL, solvent). Chiral HPLC analysis was performed using a Shimadzu LC-20 HPLC.

### General procedure for the preparation of spiropyrrolidinyl-benzothiazolines **3**

After a suspension of the DM-Segphos (0.0077 mmol) and Cu(OTf)<sub>2</sub> (0.007 mol) in CH<sub>2</sub>Cl<sub>2</sub> (0.2 mL) was stirred for 1h at room temperature, a solution of the imine **2** (0.12 mmol) in CH<sub>2</sub>Cl<sub>2</sub> (0.1 mL) was added. After being stirred at -25 °C for 10 mins, DBU (0.12 mmol) and a solution of the dipolarophile **1** (0.1mmol) in CH<sub>2</sub>Cl<sub>2</sub> (0.1 mL) was added and the resulting solution was stirred at -25 °C for 2h. After that, saturated aqueous NH<sub>4</sub>Cl (0.2 mL) was added and the organic layer was separated and evaporated to remove solvent under reduced pressure. The residue was subjected to column chromatography on silica gel (100-200 mesh) using petroleum/ethyl acetate as eluent to afford spiropyrrolidinyl-benzothiazolines **3**.

**(2'*R*,3*R*,4'*S*,5'*R*)-1-methyl-2',4'-diphenyl-5'-methoxycarbonyl-1*H*-spiro[benzo[*c*]isothiazole-3,3'-pyrrolidine]-2,2-dioxide (**3m**)** (CCDC 1515086)

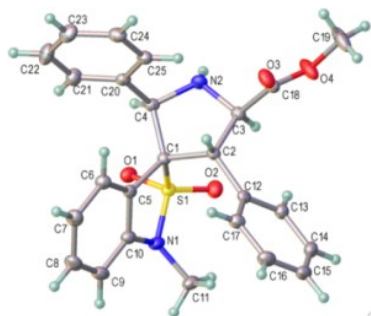

Fig 1. X-ray crystallography of compound **3m**.

<sup>1</sup> G. Cao, F. Long, Y. Zhao, Y. Wang, L. Huang and D. Teng, *Tetrahedron*, 2014, 70, 9359.

## Characterization data and spectra of compound 3a-t

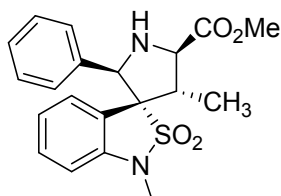

(2'*R*,3*R*,4'*S*,5'*R*)-1,4'-dimethyl-2'-phenyl-5'-methoxycarbonyl-1*H*-spiro[benzo[*c*]isothiazole-3,3'-pyrrolidine]-2,2-dioxide (**3a**)

<sup>1</sup>H NMR (500 MHz, CDCl<sub>3</sub>): δ 7.19 (t, 1H, *J* = 7.8 Hz), 7.15-7.03 (m, 5H), 6.77 (t, 1H, *J* = 7.7 Hz), 6.53 (d, 1H, *J* = 7.8 Hz), 6.36 (d, 1H, *J* = 7.6 Hz), 5.19 (s, 1H), 4.07 (d, 1H, *J* = 9.4 Hz), 3.89 (s, 3H), 3.11-3.06 (m, 1H), 2.96 (s, 3H), 1.43 (d, 3H, *J* = 7.1 Hz). <sup>13</sup>C NMR (125 MHz, CDCl<sub>3</sub>): δ 173.4, 140.9, 138.0, 129.2, 127.9, 127.7, 127.4, 125.3, 122.9, 121.6, 108.7, 66.0, 64.5, 52.4, 43.2, 26.1, 12.6.; HRMS (ESI-TOF<sup>+</sup>): *m/z* Calcd. for C<sub>20</sub>H<sub>23</sub>N<sub>2</sub>O<sub>4</sub>S [(*M*+*H*)<sup>+</sup>]: 387.1379. Found: 387.1376. Chiral HPLC (Daicel Chiralpak AD-H, 30% IPA/hexanes, 1 mL/min, λ = 254 nm) *t*<sub>R</sub>(major) = 9.391 min, *t*<sub>R</sub>(minor) = 14.358 min; [α]<sub>D</sub><sup>25</sup> = +54.8° (c = 0.27, CH<sub>2</sub>Cl<sub>2</sub>).

### <sup>1</sup>H NMR Spectrum of 3a

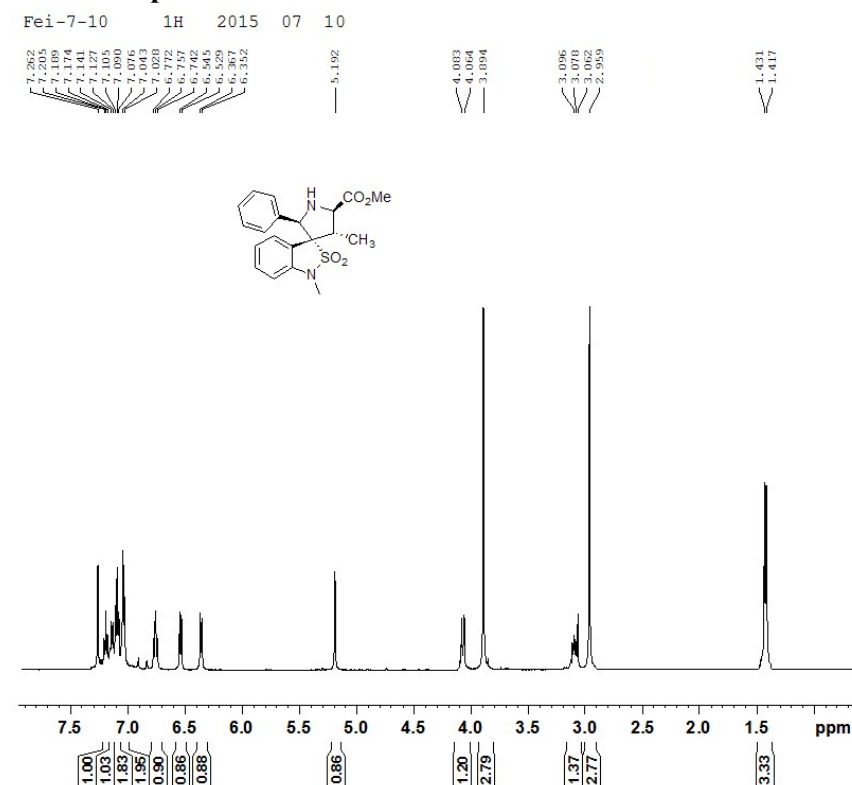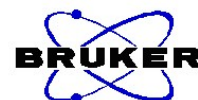

```

NAME          Fei-7-10
EXPNO         1
PROCNO        1
Date_         20150710
Time          15.48
INSTRUM       spect
PROBHD        5 mm PABBO BB-
PULPROG       zg30
TD            32768
SOLVENT       CDCl3
NS            8
DS            1
SWH           10000.000 Hz
FIDRES        0.305176 Hz
AQ            1.6385000 sec
RG            256
DW            50.0000 usec
DE            6.00 usec
TE            673.2 K
D1            1.00000000 sec
TDO           1

===== CHANNEL f1 =====
NUC1          1H
P1            13.00 usec
PL1           2.00 dB
SFO1          500.0335010 MHz
SI            16384
SF            500.0300097 MHz
WDW           EM
SSB           0
LB            0.30 Hz
GB            0
PC            4.00
    
```

### <sup>13</sup>C NMR Spectrum of 3a

LF-7-31-1-S

13C 2015 07 31

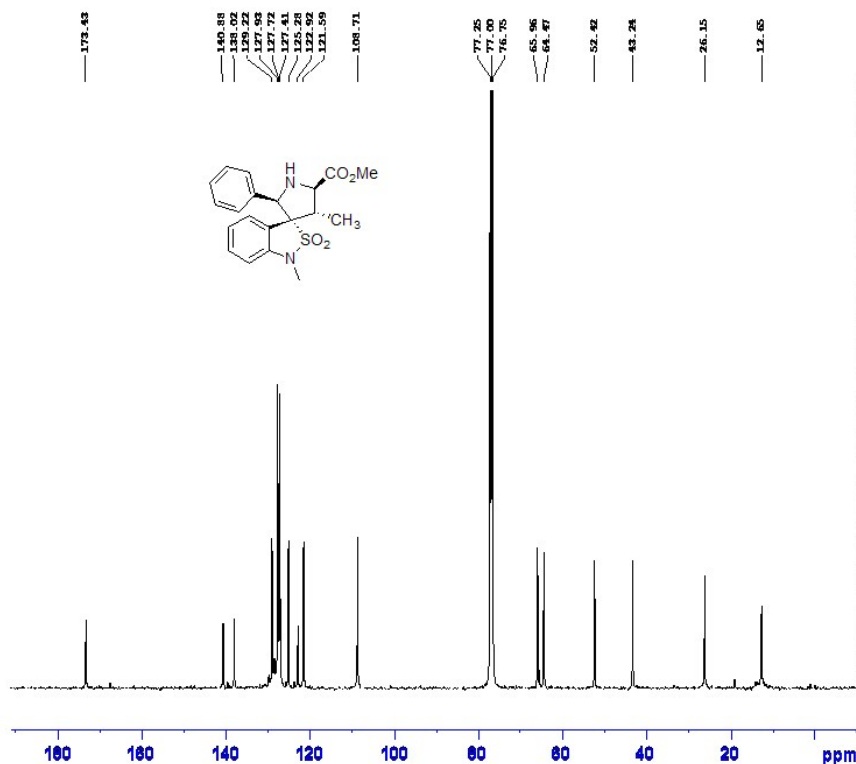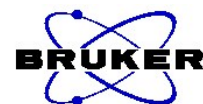

```

NAME      LF7-7-31-1-S
EXPNO     2
PROCNO    1
DATE_     20150731
TIME      12.26
INSTRUM   spect
PROBHD    5 mm F4BBO BB-
PULPROG   zgpg30
TD         65536
SOLVENT   CDCl3
NS         4006
DS         2
SWH        32679.736 Hz
FIDRES     0.458653 Hz
AQ         1.0027661 sec
RG         575
DS         15.300 usec
DE         6.00 usec
TE         673.2 K
D1         2.0000000 sec
d11        0.0300000 sec
DELTA      1.8999998 sec
TDC        20

===== CHANNEL f1 =====
NUC1       13C
P1         12.20 usec
PL1        3.00 dB
SFO1       125.7464750 MHz

===== CHANNEL f2 =====
CFDPRG2   waltz16
NUC2       1H
PCPD2     80.00 usec
PL2        2.00 dB
PL12       17.70 dB
PL13       17.70 dB
SFO2       500.0355000 MHz
SI         32768
SF         125.7326463 MHz
WDW        EM
SBB         0
LB         10.00 Hz
GB         0
PC         1.00

```

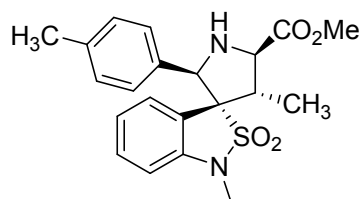

(2'*R*,3*R*,4'*S*,5'*R*)-1,4'-dimethyl-2'-(*p*-tolyl)-5'-methoxycarbonyl-1*H*-spiro[benzo[*c*]isothiazole-3,3'-pyrrolidine]-2,2-dioxide (**3b**)

$^1\text{H}$  NMR (500 MHz,  $\text{CDCl}_3$ ):  $\delta$  7.19 (t, 1H,  $J = 7.8$  Hz), 6.90 (s, 4H), 6.77 (t, 1H,  $J = 7.6$  Hz), 6.53 (d, 1H,  $J = 7.9$  Hz), 6.39 (d, 1H,  $J = 7.7$  Hz), 5.14 (s, 1H), 4.04 (d, 1H,  $J = 9.3$  Hz), 3.88 (s, 3H), 3.09-3.05 (m, 1H), 2.95 (s, 3H), 2.24 (s, 3H), 1.42 (d, 3H,  $J = 7.0$  Hz).  $^{13}\text{C}$  NMR (125 MHz,  $\text{CDCl}_3$ ):  $\delta$  173.5, 140.9, 137.3, 134.9, 129.1, 128.1, 127.8, 125.3, 123.1, 121.5, 108.7, 65.8, 64.4, 52.4, 43.4, 26.2, 21.0, 12.7.; HRMS (ESI-TOF $^+$ ):  $m/z$  Calcd. for  $\text{C}_{21}\text{H}_{25}\text{N}_2\text{O}_4\text{S}$  [(M+H) $^+$ ]: 401.1535. Found: 401.1543. Chiral HPLC (Daicel Chiralpak AD-H, 30% IPA/hexanes, 1 mL/min,  $\lambda = 254$  nm)  $t_R$ (major) = 8.428 min,  $t_R$ (minor) = 11.642 min;  $[\alpha]_D^{25} = +45.1^\circ$  ( $c = 0.37$ ,  $\text{CH}_2\text{Cl}_2$ ).

### $^1\text{H}$ NMR Spectrum of **3b**



LF-7-16 1H 2015 07 16

7.260  
7.207  
7.176  
6.895  
6.786  
6.771  
6.548  
6.527  
6.400  
6.385  
5.140  
4.055  
4.036  
3.885  
3.086  
3.071  
3.068  
3.033  
2.943  
2.240  
1.927  
1.813  
1.254

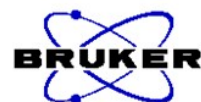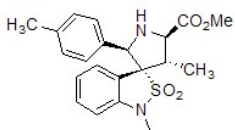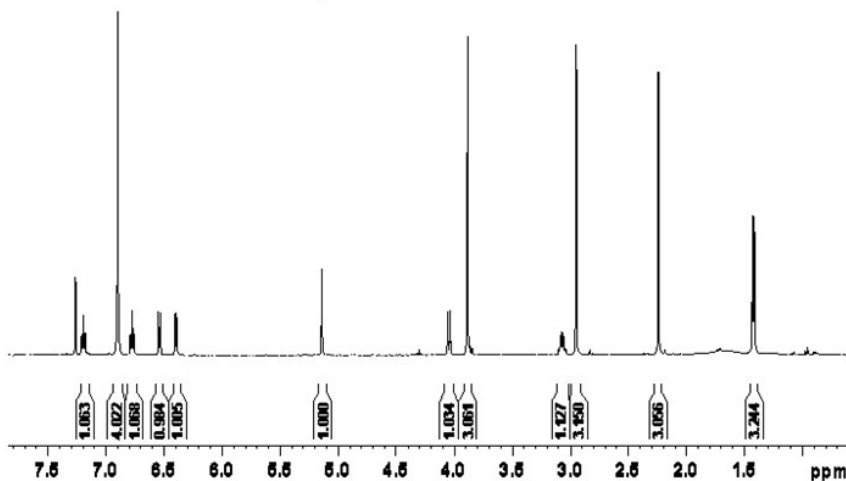

```

NAME LF-7-16-s
EXPNO 1
PROCNO 1
Date_ 20150716
Time 15.42
INSTRUM spect
PROBHD 5 mm PABBO BB-
PULPROG zg30
TD 32768
SOLVENT CDCl3
NS 16
DS 1
SWH 10000.000 Hz
FIDRES 0.305176 Hz
AQ 1.6365000 sec
RG 362
DE 50.000 usec
TE 673.2 K
D1 2.00000000 sec
TDO 1
----- CHANNEL f1 -----
NUC1 1H
P1 13.00 usec
PL1 2.00 dB
SFO1 500.0335010 MHz
SI 16384
SF 500.0300106 MHz
WDW EM
SSB 0
LB 0.30 Hz
GB 0
PC 4.00
  
```

### <sup>13</sup>C NMR Spectrum of 3b

LF-9-2-2S 13C 2015 9 2

173.46  
130.97  
130.88  
134.89  
129.38  
128.06  
127.78  
123.46  
121.53  
108.65  
77.18  
76.93  
76.67  
65.79  
64.42  
52.35  
43.35  
26.15  
20.96  
12.72

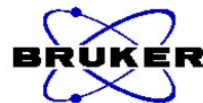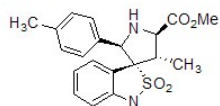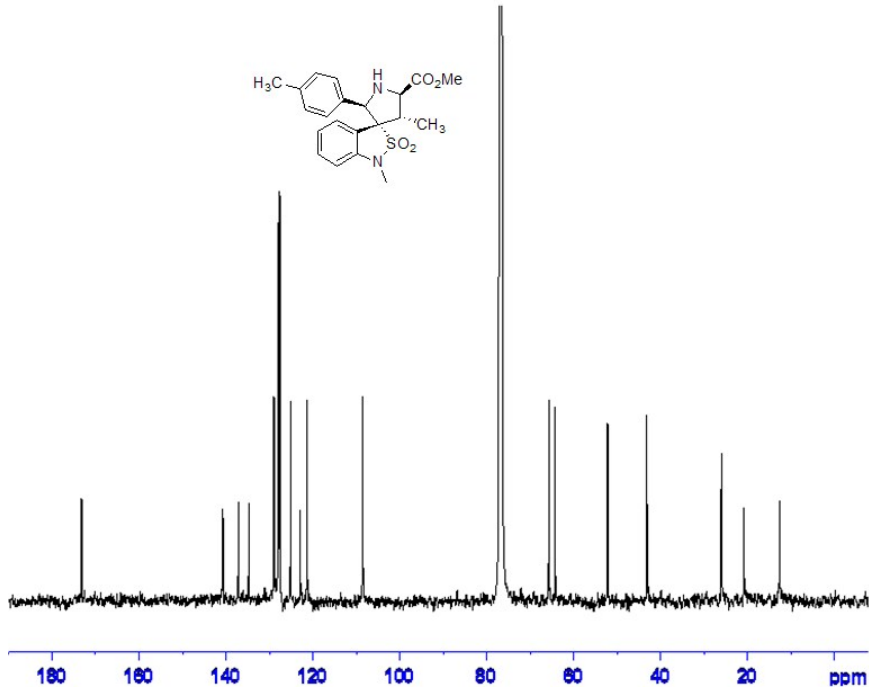

```

NAME lf-9-2-2s
EXPNO 2
PROCNO 1
Date_ 20150902
Time 21.44
INSTRUM spect
PROBHD 5 mm PABBO BB-
PULPROG zgpg30
TD 65536
SOLVENT CDCl3
NS 5000
DS 2
SWH 32679.738 Hz
FIDRES 0.498653 Hz
AQ 1.0027661 sec
RG 456
DE 15.300 usec
TE 301.1 K
D1 2.00000000 sec
d11 0.03000000 sec
DELTA 1.89999998 sec
TDO 10
----- CHANNEL f1 -----
NUC1 13C
P1 12.20 usec
PL1 3.00 dB
SFO1 125.7464750 MHz
----- CHANNEL f2 -----
CFDPRG2 waltz16
NUC2 1H
PCPD2 80.00 usec
PL2 2.00 dB
PL12 17.70 dB
PL13 17.70 dB
SFO2 500.0355000 MHz
SI 32768
SF 125.7326512 MHz
WDW EM
SSB 0
LB 8.00 Hz
GB 0
PC 1.00
  
```

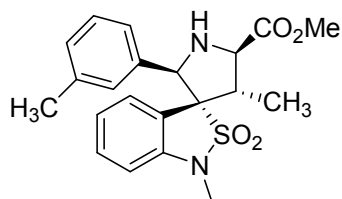

(2'R,3R,4'S,5'R)-1,4-dimethyl-2'-(*m*-tolyl)-5'-methoxycarbonyl-1*H*-spiro[benzo[*c*]isothiazole-3,3'-pyrrolidine]-2,2-dioxide (**3c**)

<sup>1</sup>H NMR (500 MHz, CDCl<sub>3</sub>): δ 7.19 (t, 1H, *J* = 7.3 Hz), 6.99-6.94 (m, 2H), 6.87 (d, 1H, *J* = 7.5 Hz), 6.78-6.76 (m, 2H), 6.54 (d, 1H, *J* = 7.9 Hz), 6.36 (d, 1H, *J* = 7.7 Hz), 5.15 (s, 1H), 4.07 (d, 1H, *J* = 9.4 Hz), 3.90 (s, 3H), 3.11-3.05 (m, 1H), 2.96 (s, 3H), 2.14 (s, 3H), 1.42 (d, 3H, *J* = 7.0 Hz). <sup>13</sup>C NMR (125 MHz, CDCl<sub>3</sub>): δ 173.5, 140.9, 137.9, 137.0, 129.2, 128.6, 128.4, 127.3, 125.4, 125.1, 123.0, 121.5, 108.7, 66.0, 64.5, 52.5, 43.2, 26.2, 21.2, 12.7.; HRMS (ESI-TOF<sup>+</sup>): *m/z* Calcd. for C<sub>21</sub>H<sub>25</sub>N<sub>2</sub>O<sub>4</sub>S [(M+H)<sup>+</sup>]: 401.1535. Found: 401.1544. Chiral HPLC (Daicel Chiralpak AD-H, 10% IPA/hexanes, 1 mL/min, λ = 254 nm) *t*<sub>R</sub>(major) = 15.676 min, *t*<sub>R</sub>(minor) = 48.439 min; [α]<sub>D</sub><sup>25</sup> = +30.4° (c = 0.28, CH<sub>2</sub>Cl<sub>2</sub>).

### <sup>1</sup>H NMR Spectrum of **3c**

LF-7-31-3-S 1H 2015 07 31

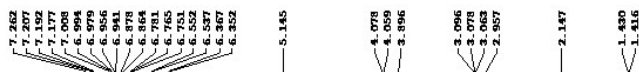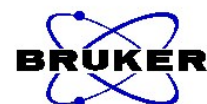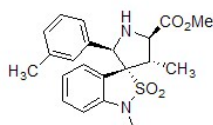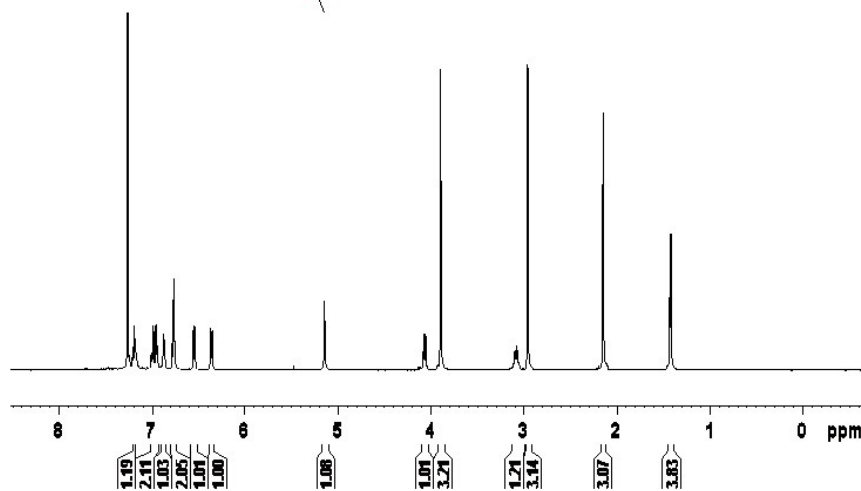

```

NAME LF-7-31-3-S
EXPNO 1
PROCNO 1
Date_ 20150731
Time 10.12
INSTRUM spect
PROBHD 5 mm PABBO BB-
PULPROG zg30
TD 32768
SOLVENT CDCl3
NS 16
DS 1
SWH 10000.000 Hz
FIDRES 0.305176 Hz
AQ 1.6385000 sec
RG 724
DW 50.000 usec
DE 6.00 usec
TE 673.2 K
D1 1.00000000 sec
TDO 1
----- CHANNEL f1 -----
NUC1 1H
P1 13.00 usec
PL1 2.00 dB
SFO1 500.0335010 MHz
SI 16384
SF 500.0300399 MHz
WDW EM
SSB 0
LB 0.30 Hz
GB 0
PC 4.00

```

### <sup>13</sup>C NMR Spectrum of **3c**

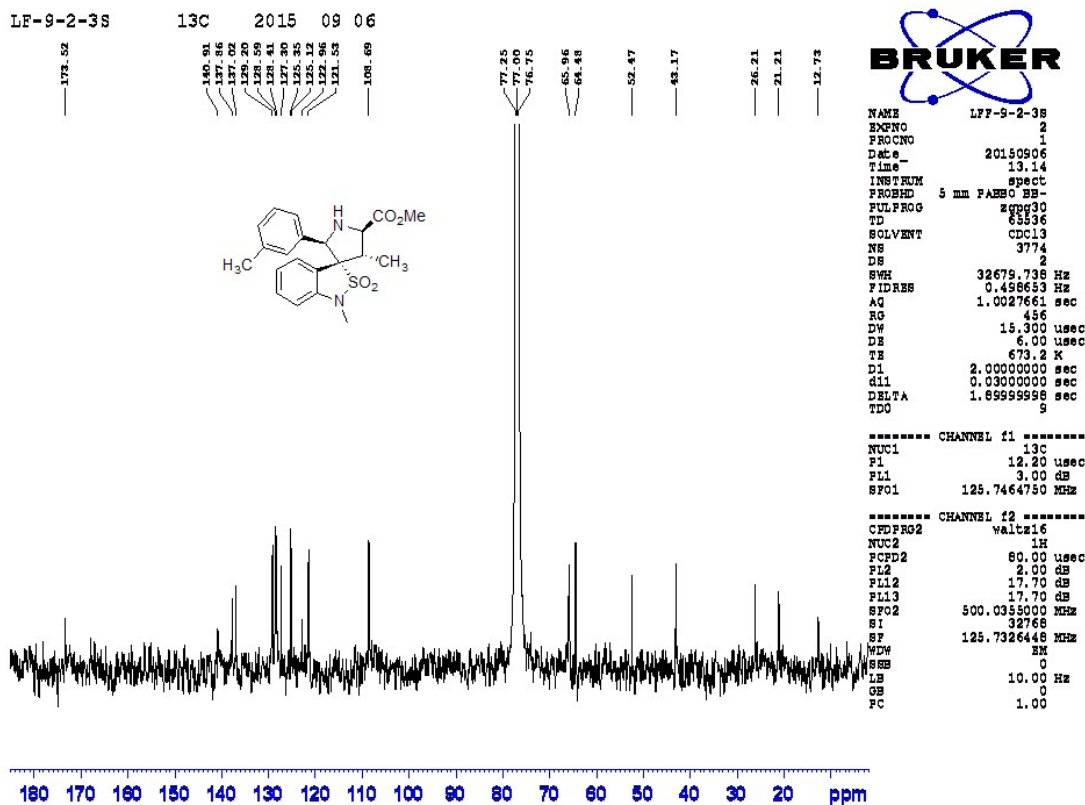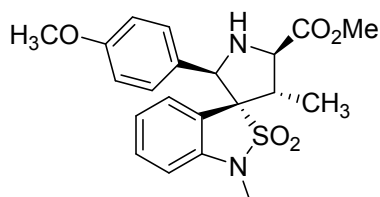

(2'*R*,3*R*,4'*S*,5'*R*)-1,4'-dimethyl-2'-(4-methoxyphenyl)-5'-methoxycarbonyl-1*H*-spiro[benzo[*c*]isothiazole-3,3'-pyrrolidine]-2,2-dioxide (**3d**)

<sup>1</sup>H NMR (500 MHz, CDCl<sub>3</sub>): δ 7.20 (t, 1H, *J* = 7.9 Hz), 6.94 (d, 2H, *J* = 8.5 Hz), 6.80 (t, 1H, *J* = 7.7 Hz), 6.62 (d, 2H, *J* = 8.5 Hz), 6.53 (d, 1H, *J* = 7.9 Hz), 6.45 (d, 1H, *J* = 7.6 Hz), 5.13 (s, 1H), 4.04 (d, 1H, *J* = 9.2 Hz), 3.89 (s, 3H), 3.73 (s, 3H), 3.09-3.06 (m, 1H), 2.94 (s, 3H), 1.44 (d, 3H, *J* = 7.1 Hz). <sup>13</sup>C NMR (125 MHz, CDCl<sub>3</sub>): δ 173.5, 159.2, 140.9, 129.8, 129.2, 129.1, 125.3, 123.2, 121.7, 112.8, 108.7, 65.7, 64.5, 55.2, 52.5, 43.3, 26.2, 13.1.; HRMS (ESI-TOF<sup>+</sup>): *m/z* Calcd. for C<sub>21</sub>H<sub>25</sub>N<sub>2</sub>O<sub>5</sub>S [(*M*+*H*)<sup>+</sup>]: 417.1484. Found: 417.1492. Chiral HPLC (Daicel Chiralpak AD-H, 20% IPA/hexanes, 0.8 mL/min, λ = 254 nm) *t*<sub>R</sub>(major) = 19.215 min, *t*<sub>R</sub>(minor) = 28.847 min; [α]<sub>D</sub><sup>25</sup> = +32.2° (c = 0.36, CH<sub>2</sub>Cl<sub>2</sub>).

### <sup>1</sup>H NMR Spectrum of **3d**

LF-7-31-5-8

1H 2015 07 31

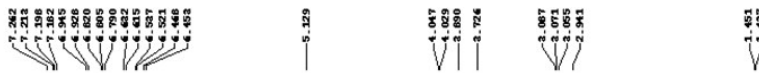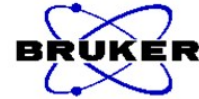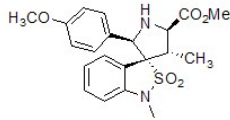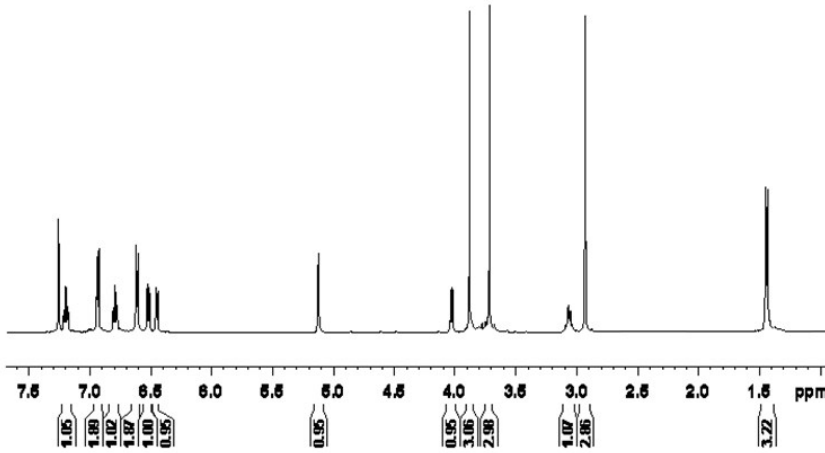

```

NAME LF7-7-31-5-8
EXPNO 1
PROCNO 1
Date_ 20150731
Time 10.38
INSTRUM spect
PROBHD 5 mm F4000 BB-
PULPROG zgpg30
TD 32768
SOLVENT cdcl3
NS 16
DS 1
SWH 10000.000 Hz
FIDRES 0.303176 Hz
AQ 1.633500 sec
RG 312
DW 30.000 usec
DE 6.00 usec
TE 673.2 K
D1 1.0000000 sec
D11 1.0000000 sec
TDO 1
  
```

```

===== CHANNEL f1 =====
NUC1 1H
P1 13.00 usec
PL1 2.00 dB
SFO1 500.0335010 MHz
SI 16384
SF 500.0300098 MHz
WDW EM
SSB 0
LB 0.30 Hz
GB 0
PC 4.00
  
```

**<sup>13</sup>C NMR Spectrum of 3d**

LF-9-2-5-8

13C 2015 09 06

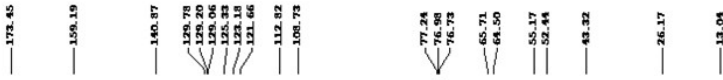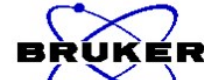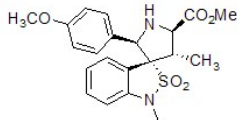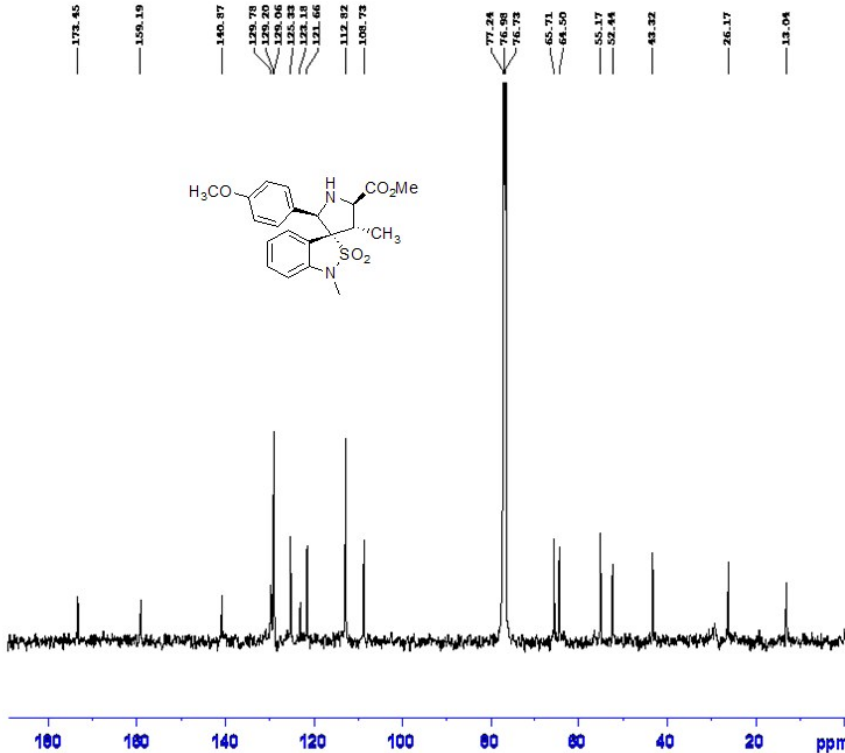

```

NAME LF7-9-2-5-8
EXPNO 2
PROCNO 1
Date_ 20150907
Time 7.39
INSTRUM spect
PROBHD 5 mm F4000 BB-
PULPROG zgpg30
TD 65536
SOLVENT cdcl3
NS 1414
DS 2
SWH 32679.738 Hz
FIDRES 0.498653 Hz
AQ 1.0027661 sec
RG 1820
DW 15.300 usec
DE 6.00 usec
TE 673.2 K
D1 2.0000000 sec
d11 0.0300000 sec
DELTA 1.6999999 sec
TDO 10
  
```

```

===== CHANNEL f1 =====
NUC1 13C
P1 12.20 usec
PL1 3.00 dB
SFO1 125.7464750 MHz

===== CHANNEL f2 =====
CPDPRG2 waltz16
NUC2 1H
PCPD2 80.00 usec
PL2 2.00 dB
PL12 17.70 dB
PL13 17.70 dB
SFO2 500.0355000 MHz
SI 32768
SF 125.7326452 MHz
WDW EM
SSB 0
LB 10.00 Hz
GB 0
PC 1.00
  
```

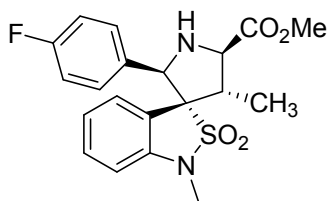

(2'*R*,3*R*,4'*S*,5'*R*)-1,4'-dimethyl-2'-(4-fluorophenyl)-5'-methoxycarbonyl-1*H*-spiro[benzo[*c*]isothiazole-3,3'-pyrrolidine]-2,2-dioxide (**3e**)

<sup>1</sup>H NMR (500 MHz, CDCl<sub>3</sub>): δ 7.20 (t, 1H, *J* = 7.7 Hz), 7.02-7.00 (m, 2H), 6.82-6.76 (m, 3H), 6.54 (d, 1H, *J* = 8.0 Hz), 6.47 (d, 1H, *J* = 7.4 Hz), 5.14 (s, 1H), 4.03 (d, 1H, *J* = 9.2 Hz), 3.88 (s, 3H), 3.09-3.05 (m, 1H), 2.94 (s, 3H), 1.44 (d, 3H, *J* = 7.1 Hz). <sup>13</sup>C NMR (125 MHz, CDCl<sub>3</sub>): δ 173.4, 140.7, 133.6, 129.6, 129.5, 129.3, 125.2, 122.9, 121.7, 114.2, 114.0, 108.7, 76.2, 65.4, 64.5, 52.4, 42.9, 26.0, 12.9.; HRMS (ESI-TOF<sup>+</sup>): *m/z* Calcd. for C<sub>20</sub>H<sub>22</sub>FN<sub>2</sub>O<sub>4</sub>S [(*M*+*H*)<sup>+</sup>]: 405.1284. Found: 405.1280. Chiral HPLC (Daicel Chiralpak AD-H, 30% IPA/hexanes, 1 mL/min, λ = 254 nm) *t*<sub>R</sub>(major) = 7.982 min, *t*<sub>R</sub>(minor) = 10.172 min; [α]<sub>D</sub><sup>25</sup> = +28.7° (c = 0.24, CH<sub>2</sub>Cl<sub>2</sub>).

### <sup>1</sup>H NMR Spectrum of **3e**

LF-7-31-4-S 1H 2015 07 31

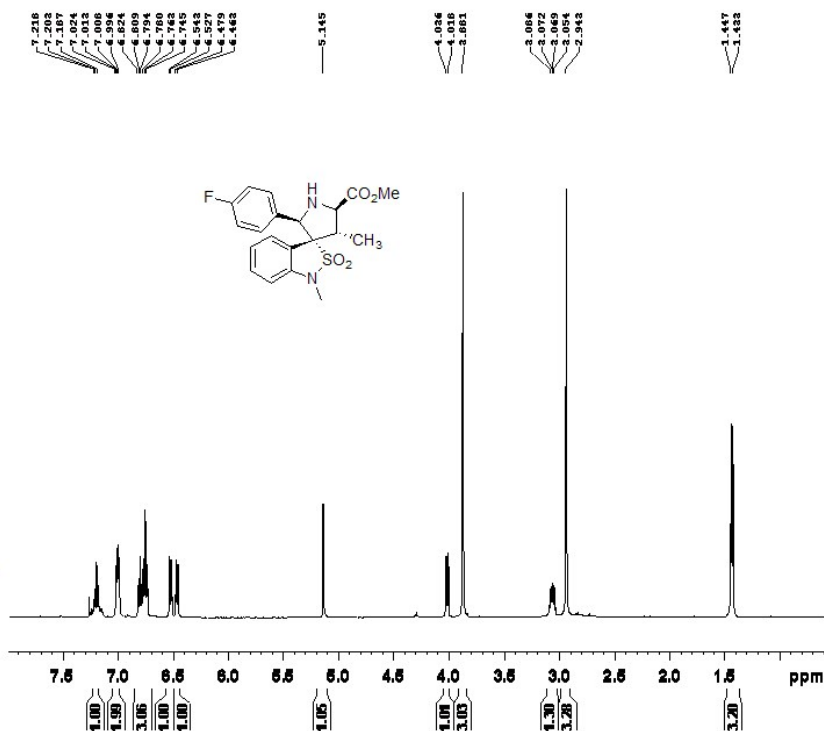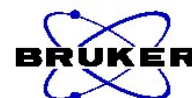

```

NAME LF-7-31-4-S
EXPNO 1
PROCNO 1
DATE_ 20150731
Time 10.28
INSTRUM spect
PROBHD 5 mm PABBO BB-
PULPROG zg30
TD 32768
SOLVENT CDCl3
NS 8
DS 1
SWH 10000.000 MHz
FIDRES 0.303176 MHz
AQ 1.6385000 sec
RG 724
DH 50.000 usec
DE 6.000 usec
TE 673.2 K
D1 1.00000000 sec
TD0 1

===== CHANNEL f1 =====
NUC1 1H
P1 13.00 usec
PL1 2.00 dB
SFO1 300.0335010 MHz
SI 16384
SF 300.0300064 MHz
WDW EM
SSB 0
LB 0.30 MHz
GB 0
PC 4.00

```

### <sup>13</sup>C NMR Spectrum of **3e**

LF-9-2-4s 13C 2015 9 8

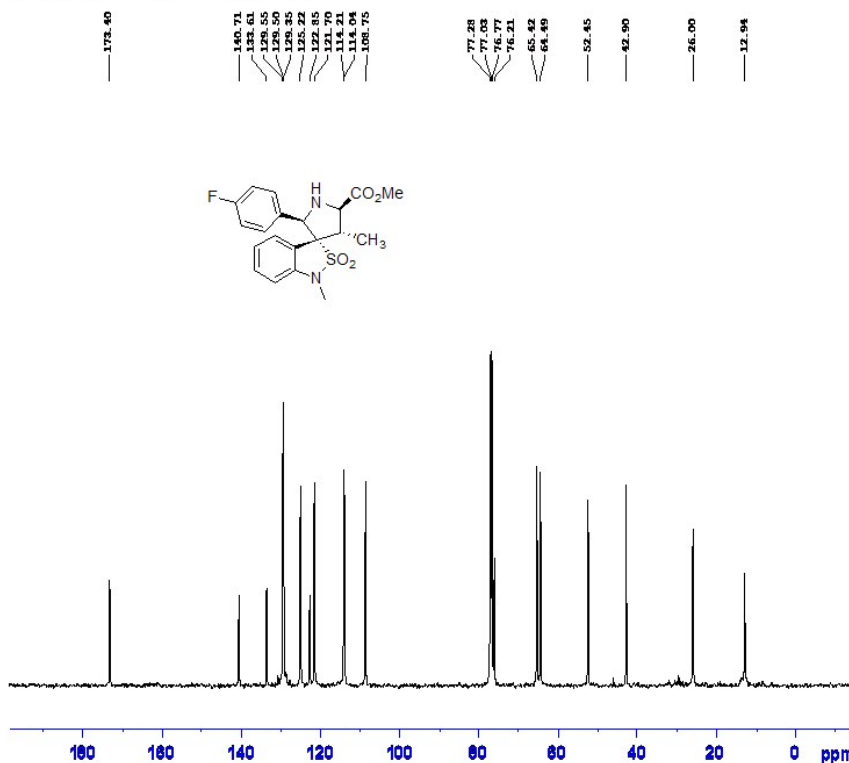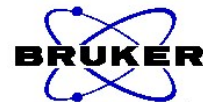

```

NAME LF-9-2-4s
EXPNO 2
PROCNO 1
Date_ 20150908
Time 8.44
INSTRUM spect
PROBHD 5 mm F4BBO BB-
PULPROG zgpg30
TD 65536
SOLVENT CDCl3
NS 744
DS 2
SWH 32679.738 Hz
FIDRES 0.488653 Hz
AQ 1.0027661 sec
RG 456
DW 19.300 usec
DE 6.00 usec
TE 673.2 K
D1 2.0000000 sec
d11 0.0300000 sec
DELTA 1.89999998 sec
TDC 10

```

```

===== CHANNEL f1 =====
NUC1 13C
P1 12.20 usec
PL1 3.00 dB
SFO1 125.7464750 MHz

===== CHANNEL f2 =====
CPDPRG2 waltz16
NUC2 1H
PCPD2 60.00 usec
PL2 2.00 dB
PL12 17.70 dB
PL13 17.70 dB
SFO2 500.0355000 MHz
SI 32768
SF 125.7326512 MHz
WDW EM
SFB 0
LB 10.00 Hz
GB 0
PC 1.00

```

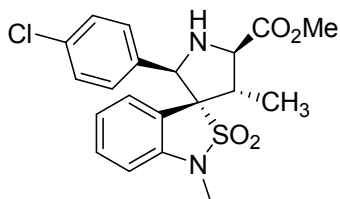

(2'*R*,3*R*,4'*S*,5'*R*)-1,4'-dimethyl-2'-(4-chlorophenyl)-5'-methoxycarbonyl-1*H*-spiro[benzo[*c*]isothiazole-3,3'-pyrrolidine]-2,2-dioxide (**3f**)

<sup>1</sup>H NMR (500 MHz, CDCl<sub>3</sub>): δ 7.13 (t, 1H, *J* = 7.7 Hz), 6.98-6.89 (m, 4H), 6.74 (t, 1H, *J* = 7.6 Hz), 6.47 (d, 1H, *J* = 7.9 Hz), 6.40 (d, 1H, *J* = 7.6 Hz), 5.05 (s, 1H), 3.95 (d, 1H, *J* = 9.3 Hz), 3.80 (s, 3H), 3.00-2.97 (m, 1H), 2.87 (s, 3H), 1.35 (d, 3H, *J* = 7.0 Hz). <sup>13</sup>C NMR (125 MHz, CDCl<sub>3</sub>): δ 173.4, 140.8, 136.5, 133.5, 129.5, 129.3, 127.5, 125.3, 122.7, 121.8, 108.9, 76.3, 65.5, 64.5, 52.5, 43.0, 26.1, 12.9.; HRMS (ESI-TOF<sup>+</sup>): *m/z* Calcd. for C<sub>20</sub>H<sub>22</sub>ClN<sub>2</sub>O<sub>4</sub>S [(M+H)<sup>+</sup>]: 421.0989. Found: 421.0983. Chiral HPLC (Daicel Chiralpak AD-H, 30% IPA/hexanes, 1 mL/min, λ = 254 nm) *t*<sub>R</sub>(major) = 8.180 min, *t*<sub>R</sub>(minor) = 10.133 min; [α]<sub>D</sub><sup>25</sup> = +40.3° (c = 0.29, CH<sub>2</sub>Cl<sub>2</sub>).

### <sup>1</sup>H NMR Spectrum of 3f

LF-7-31-6-S

1H 2015 07 31

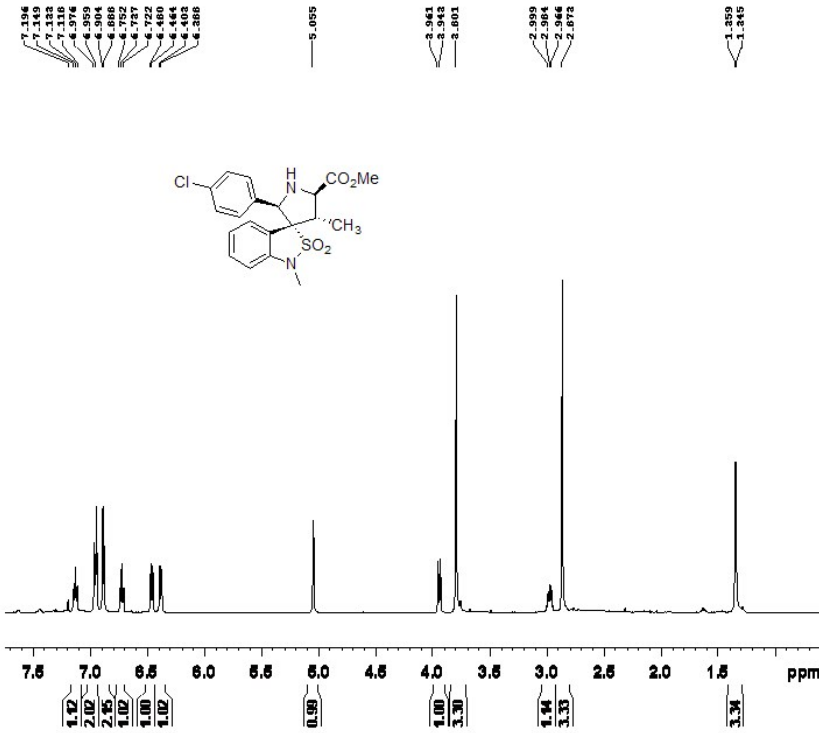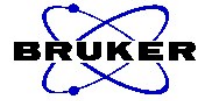

```

NAME LF7-7-31-6-S
EXPNO 1
PROCNO 1
DATE_ 20150731
Time 11.03
INSTRUM spect
PROBHD 5 mm PABBO BB-
PULPROG zgpg30
TD 32768
SOLVENT CDCl3
NS 9
DS 1
SWH 10000.000 Kh
FIDRES 0.303176 Kh
AQ 1.6383000 sec
RG 512
DW 50.000 usec
DE 6.00 usec
TE 673.2 K
D1 1.00000000 sec
TDO 1
----- CHANNEL f1 -----
NUC1 1H
P1 13.00 usec
PL1 2.00 dB
SFO1 300.0355010 MHz
SI 16384
SF 300.0300422 MHz
WDW EM
SSB 0
LB 0.30 Kh
GB 0
PC 4.00
    
```

**<sup>13</sup>C NMR Spectrum of 3f**

LF-9-2-6-S 13C 2015 09 08

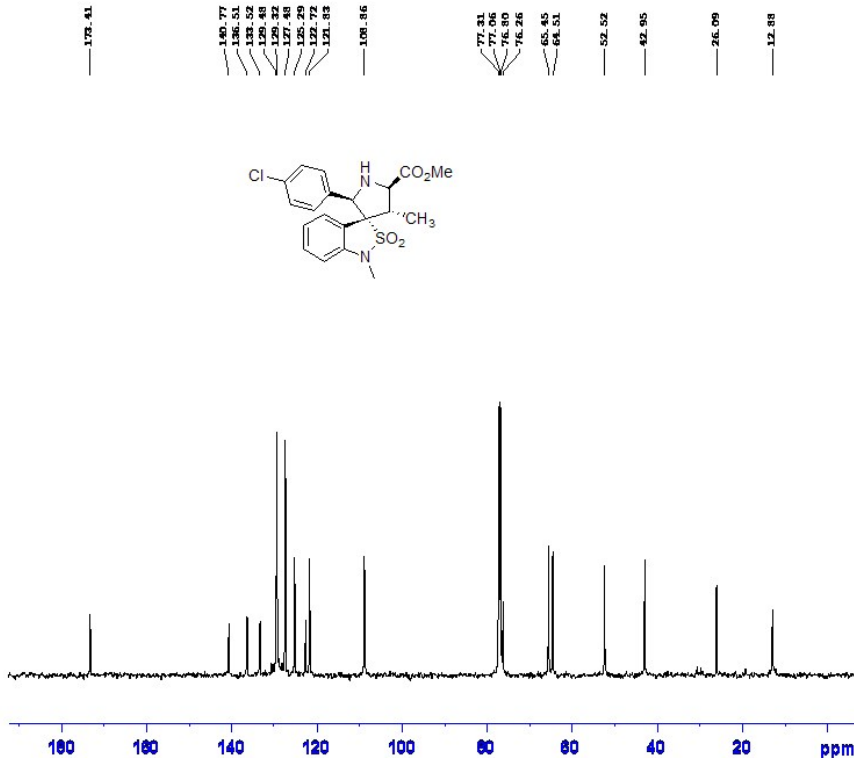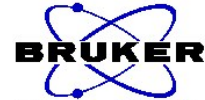

```

NAME LF7-9-2-6-S
EXPNO 2
PROCNO 1
DATE_ 20150908
Time 11.13
INSTRUM spect
PROBHD 5 mm PABBO BB-
PULPROG zgpg30
TD 85536
SOLVENT CDCl3
NS 353
DS 2
SWH 32679.738 Hz
FIDRES 0.498653 Hz
AQ 1.0027651 sec
RG 1820
DW 15.300 usec
DE 6.00 usec
TE 673.2 K
D1 2.00000000 sec
d11 0.03000000 sec
DELTA 1.89999998 sec
TDO 4
----- CHANNEL f1 -----
NUC1 13C
P1 12.20 usec
PL1 3.00 dB
SFO1 125.7464780 MHz
----- CHANNEL f2 -----
CFDPRG2 waltz16
NUC2 1H
PCPD2 80.00 usec
PL2 2.00 dB
PL12 17.70 dB
PL13 17.70 dB
SFO2 500.0355000 MHz
SI 32768
SF 125.7326452 MHz
WDW EM
SSB 0
LB 10.00 Hz
GB 0
PC 1.00
    
```

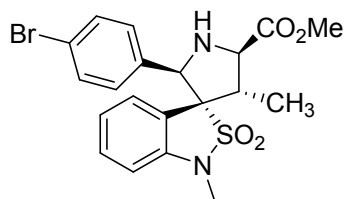

(2'*R*,3*R*,4'*S*,5'*R*)-1,4'-dimethyl-2'-(4-bromophenyl)-5'-methoxycarbonyl-1*H*-spiro[benzo[*c*]isothiazole-3,3'-pyrrolidine]-2,2-dioxide (**3g**)

<sup>1</sup>H NMR (500 MHz, CDCl<sub>3</sub>): δ 7.24-7.20 (m, 3H), 6.92 (d, 2H, *J* = 7.7 Hz), 6.83 (t, 1H, *J* = 7.5 Hz), 6.56 (d, 1H, *J* = 7.9 Hz), 6.47 (d, 1H, *J* = 7.5 Hz), 5.13 (s, 1H), 4.04 (d, 1H, *J* = 8.9 Hz), 3.89 (s, 3H), 3.08-3.05 (m, 1H), 2.97 (s, 3H), 1.43 (d, 3H, *J* = 6.8 Hz). <sup>13</sup>C NMR (125 MHz, CDCl<sub>3</sub>): δ 173.4, 140.8, 137.1, 130.4, 129.7, 129.5, 125.3, 122.7, 121.8, 108.8, 76.2, 65.5, 64.5, 52.5, 42.9, 26.1, 12.8.; HRMS (ESI-TOF<sup>+</sup>): *m/z* Calcd. for C<sub>20</sub>H<sub>22</sub>BrN<sub>2</sub>O<sub>4</sub>S [(M+H)<sup>+</sup>]: 465.0484. Found: 465.0477. Chiral HPLC (Daicel Chiralpak AD-H, 30% IPA/hexanes, 1 mL/min, λ = 254 nm) *t*<sub>R</sub>(major) = 8.742 min, *t*<sub>R</sub>(minor) = 10.748 min; [α]<sub>D</sub><sup>25</sup> = +43.3° (c = 0.40, CH<sub>2</sub>Cl<sub>2</sub>).

### <sup>1</sup>H NMR Spectrum of **3g**

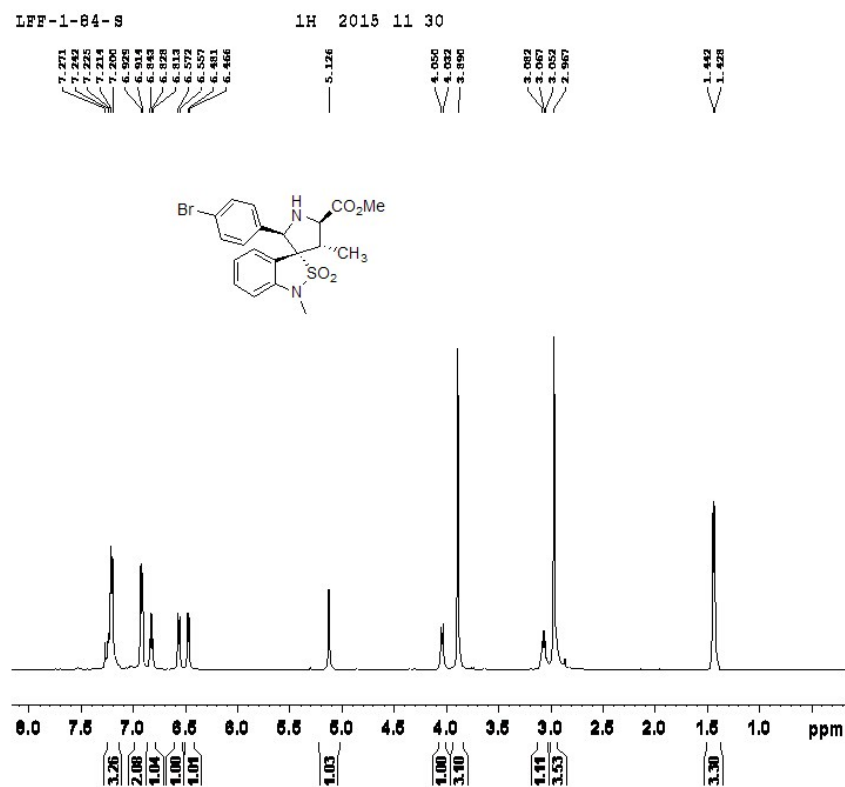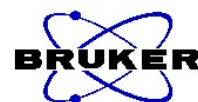

```

NAME          LFF-1-84-S
EXPNO         1
PROCNO        1
Date_         20151130
Time         16.52
INSTRUM       spect
PROBHD        5 mm PABBO BBO
PULPROG       zg30
TD            32768
SOLVENT       CDCl3
NS            8
DS            2
SWH           10000.000 Hz
FIDRES        0.305176 Hz
AQ            1.6365000 sec
RG            161
DE            50.000 usec
TE            673.2 K
DL            2.00000000 sec
TDO           1

----- CHANNEL f1 -----
NUC1          1H
P1            13.00 usec
PL1           2.00 dB
SFO1          500.0335010 MHz
SI            16384
SF            500.0300039 MHz
WDW           EM
SSB           0
LB            0.30 Hz
GB            0
PC            4.00

```

### <sup>13</sup>C NMR Spectrum of **3g**



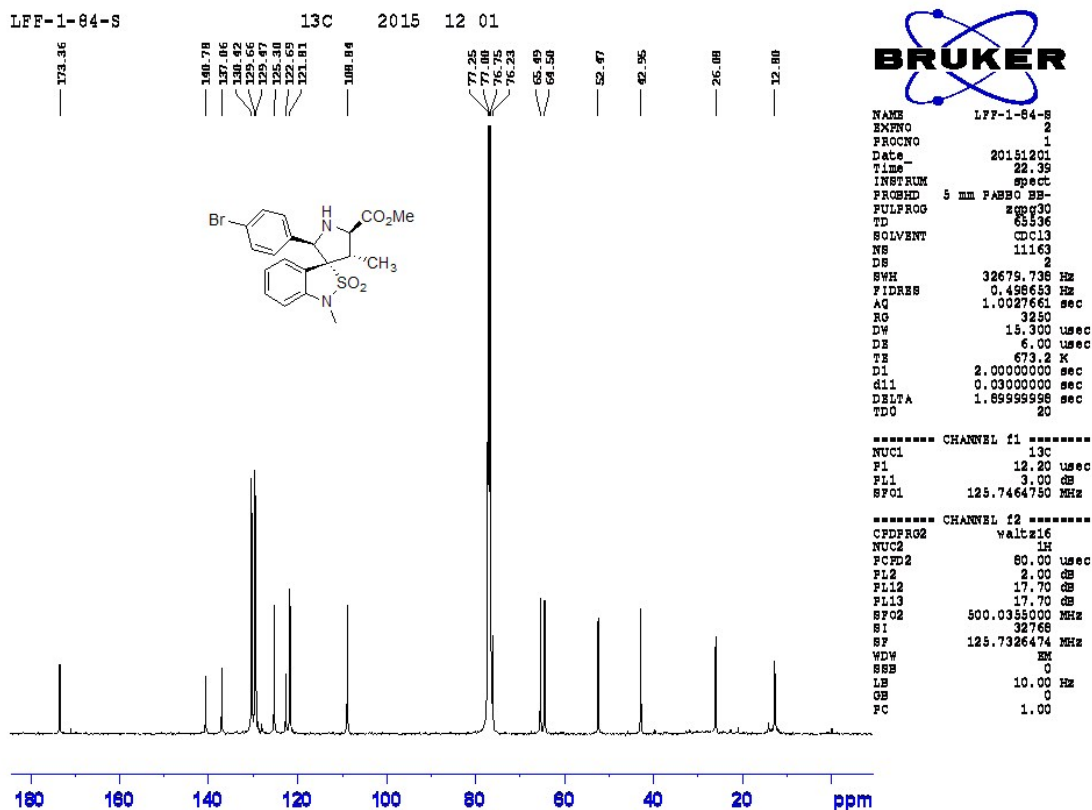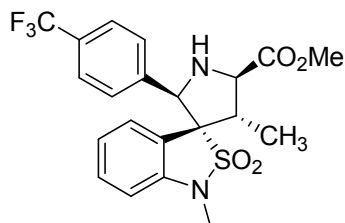

(2*R*,3*R*,4'*S*,5'*R*)-1,4'-dimethyl-2'-(4-(trifluoromethyl)phenyl)-5'-methoxycarbonyl-1*H*-spiro[benzo[*c*]isothiazole-3,3'-pyrrolidine]-2,2-dioxide (**3h**)

<sup>1</sup>H NMR (500 MHz, CDCl<sub>3</sub>): δ 7.33 (d, 2H, *J* = 8.1 Hz), 7.22 (t, 1H, *J* = 7.8 Hz), 7.17 (d, 2H, *J* = 8.0 Hz), 6.78 (t, 1H, *J* = 7.6 Hz), 6.56 (d, 1H, *J* = 7.9 Hz), 6.39 (d, 1H, *J* = 7.6 Hz), 5.23 (s, 1H), 4.07 (d, 1H, *J* = 9.5 Hz), 3.89 (s, 3H), 3.10-3.07 (m, 1H), 2.97 (s, 3H), 1.42 (d, 3H, *J* = 7.1 Hz). <sup>13</sup>C NMR (125 MHz, CDCl<sub>3</sub>): δ 173.4, 142.3, 140.8, 131.0, 129.7, 128.9, 128.4, 125.3, 124.3, 122.4, 121.9, 109.0, 76.4, 65.6, 64.5, 52.6, 42.8, 26.1, 12.6.; HRMS (ESI-TOF<sup>+</sup>): *m/z* Calcd. for C<sub>21</sub>H<sub>22</sub>F<sub>3</sub>N<sub>2</sub>O<sub>4</sub>S [(M+H)<sup>+</sup>]: 455.1252. Found: 455.1257. Chiral HPLC (Daicel Chiralpak AD-H, 20% IPA/hexanes, 0.5 mL/min, λ = 254 nm) *t*<sub>R</sub>(major) = 17.586 min, *t*<sub>R</sub>(minor) = 18.827 min; [α]<sub>D</sub><sup>18</sup> = +22.3° (c = 0.31, CH<sub>2</sub>Cl<sub>2</sub>).

**<sup>1</sup>H NMR Spectrum of 3h**

LFF-3-92A 1H 2017 01 03

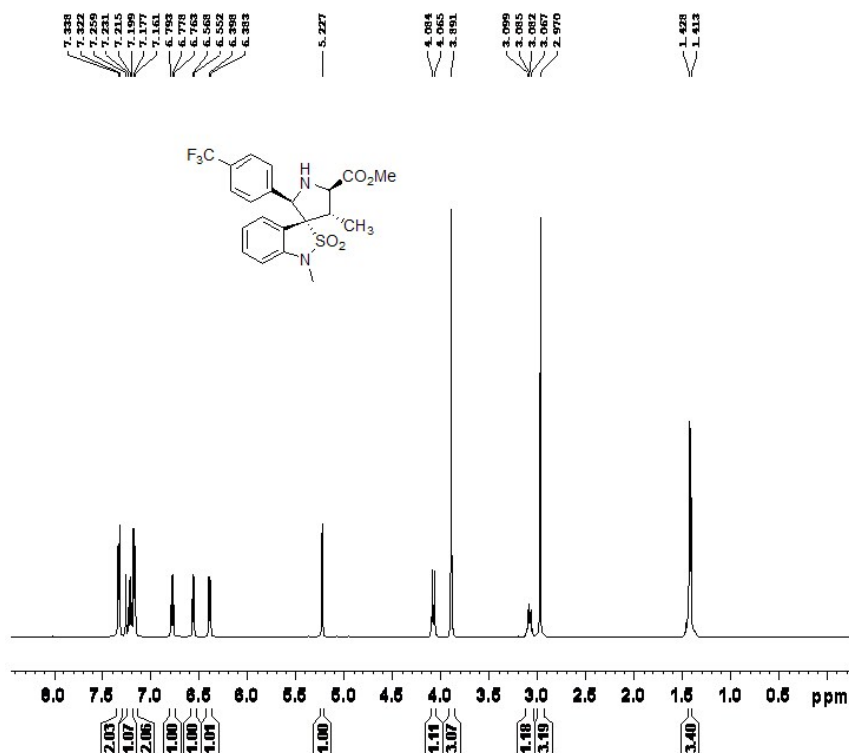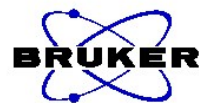

```

NAME          LFF-3-92A
EXPNO         1
PROCNO        1
Date_         20161229
Time          16.35
INSTRUM       spect
PROBHD        5 mm PABBO BB-
PULPROG       zg30
TD            32768
SOLVENT       CDC13
NS            11
DS            1
SWH           10000.000 Hz
FIDRES        0.305176 Hz
AQ            1.6385000 sec
RG            228
DW            50.000 usec
DE            6.00 usec
TE            673.2 K
D1            1.00000000 sec
TD0           1

===== CHANNEL f1 =====
NUC1          1H
P1            13.00 usec
PL1           2.00 dB
SFO1          500.0335010 MHz
SI            16384
SF            500.0300106 MHz
WDW           EM
SSB           0
LB            0.30 Hz
GB            0
PC            2.00
    
```

### <sup>13</sup>C NMR Spectrum of 3h

LFF-3-92A

<sup>13</sup>C 2017 01 10

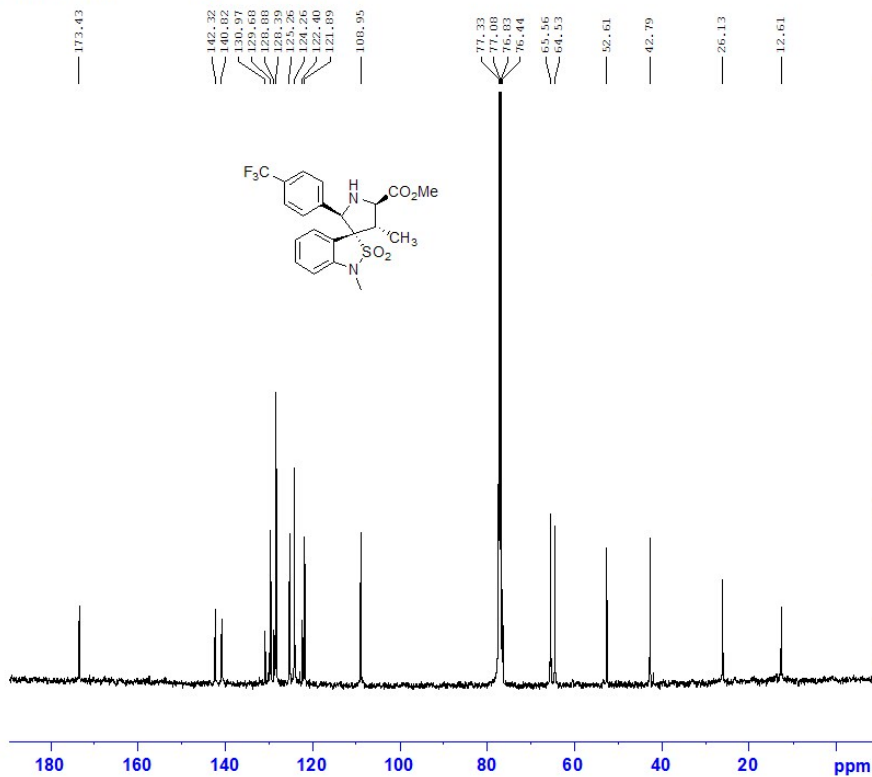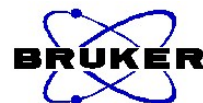

```

NAME          LFF-3-92A
EXPNO         2
PROCNO        1
Date_         20170110
Time          12.20
INSTRUM       spect
PROBHD        5 mm PABBO BB-
PULPROG       zgpg30
TD            65536
SOLVENT       CDC13
NS            1223
DS            2
SWH           32679.738 Hz
FIDRES        0.498653 Hz
AQ            1.0027661 sec
RG            3250
DW            15.300 usec
DE            6.00 usec
TE            673.2 K
D1            2.00000000 sec
d11           0.03000000 sec
DELTA         1.89999998 sec
TD0           2

===== CHANNEL f1 =====
NUC1          13C
P1            12.20 usec
PL1           3.00 dB
SFO1          125.7464750 MHz

===== CHANNEL f2 =====
CPDPRG2       waltz16
NUC2          1H
PCPD2         80.00 usec
PL2           2.00 dB
PL12          17.70 dB
PL13          17.70 dB
SFO2          500.0355000 MHz
SI            32768
SF            125.7326392 MHz
WDW           EM
SSB           0
LB            8.00 Hz
GB            0
PC            2.00
    
```

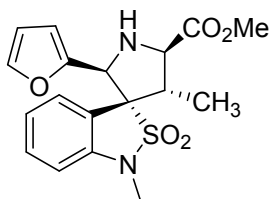

(2'*R*,3'*R*,4'*S*,5'*R*)-1,4'-dimethyl-2'-(furan-2-yl)-5'-methoxycarbonyl-1*H*-spiro[benzo[*c*]isothiazole-3,3'-pyrrolidine]-2,2-dioxide (**3i**)

<sup>1</sup>H NMR (500 MHz, CDCl<sub>3</sub>): δ 7.26-7.24 (m, 2H), 6.78 (t, 1H, *J* = 7.6 Hz), 6.67 (d, 1H, *J* = 7.9 Hz), 6.36 (d, 1H, *J* = 2.5 Hz), 6.29 (s, 1H), 6.06 (d, 1H, *J* = 7.7 Hz), 5.24 (s, 1H), 4.09 (d, 1H, *J* = 10.0 Hz), 3.83 (s, 3H), 3.22-3.17 (m, 1H), 3.10 (s, 3H), 1.31 (d, 3H, *J* = 7.1 Hz). <sup>13</sup>C NMR (125 MHz, CDCl<sub>3</sub>): δ 173.8, 152.7, 142.0, 141.1, 129.5, 124.2, 121.8, 121.2, 110.6, 109.8, 108.8, 63.0, 59.2, 52.4, 44.8, 26.5, 11.2.; HRMS (ESI-TOF<sup>+</sup>): *m/z* Calcd. for C<sub>18</sub>H<sub>21</sub>N<sub>2</sub>O<sub>5</sub>S [(*M*+*H*)<sup>+</sup>]: 377.4350. Found: 377.4355. Chiral HPLC (Daicel Chiralpak AD-H, 20% IPA/hexanes, 0.8 mL/min, λ = 254 nm) *t*<sub>R</sub>(major) = 21.408 min, *t*<sub>R</sub>(minor) = 23.827 min; [α]<sub>D</sub><sup>25</sup> = +42.4° (c = 0.31, CH<sub>2</sub>Cl<sub>2</sub>).

### <sup>1</sup>H NMR Spectrum of **3i**

LFF-1-74 1H 2015 11 18

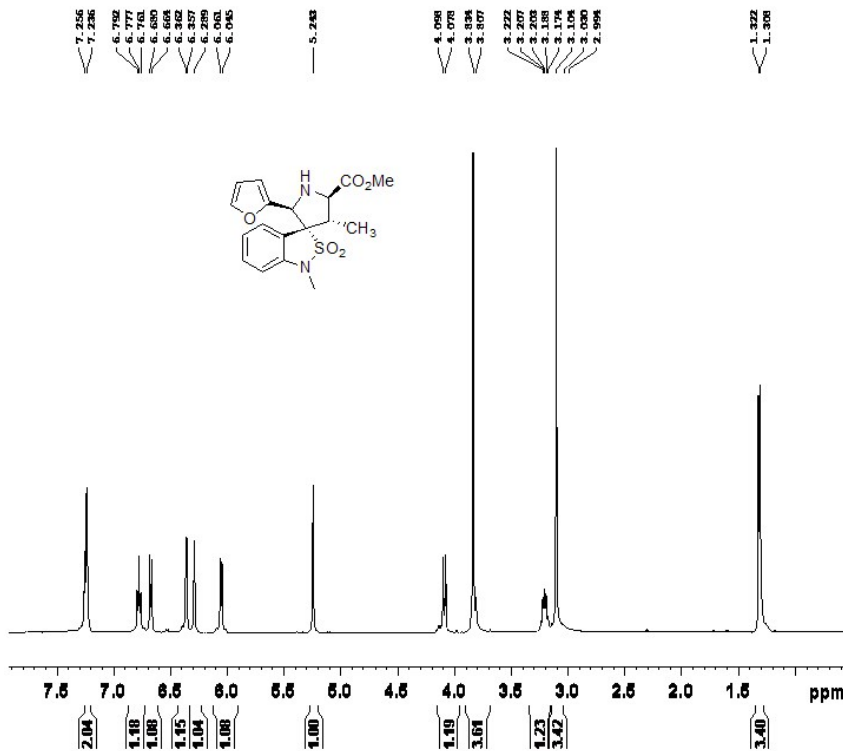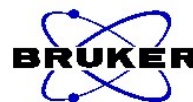

```

NAME          LFF-1-74
EXPNO         1
PROCNO        1
Date_         20151118
Time         15.18
INSTRUM       spect
PROBHD        5 mm F400 EB-
PULPROG       zg30
TD            32768
SOLVENT       CDCl3
NS            2
DS            2
SWH           10000.000 Hz
FIDRES        0.305176 Hz
AQ            1.6365000 sec
RG            161
DW            50.000 usec
DE            6.00 usec
TE            673.2 K
D1            2.00000000 sec
TDC           1

----- CHANNEL f1 -----
NUC1          1H
P1            13.00 usec
PL1           2.00 dB
SFO1          500.0335010 MHz
SI            16384
SF            500.0300122 MHz
WDW           EM
SSB           0
LB            0.10 Hz
GB            0
PC            4.00

```

### <sup>13</sup>C NMR Spectrum of **3i**

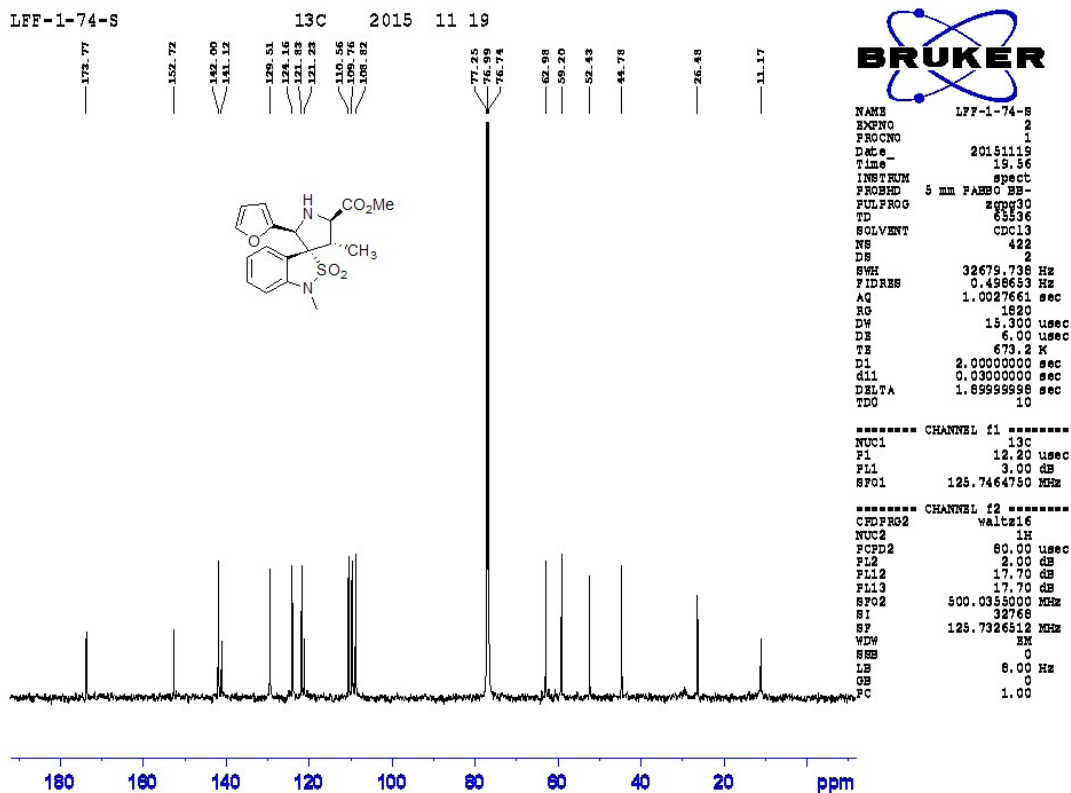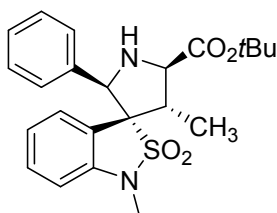

(2'*R*,3*R*,4'*S*,5'*R*)-1,4'-dimethyl-2'-phenyl-5'-*tert*-butoxycarbonyl-1*H*-spiro[benzo[*c*]isothiazole-3,3'-pyrrolidine]-2,2-dioxide (**3j**)

<sup>1</sup>H NMR (500 MHz, CDCl<sub>3</sub>): δ 7.16 (t, 1H, *J* = 7.8 Hz), 7.12-7.02 (m, 5H), 6.77 (t, 1H, *J* = 7.6 Hz), 6.50 (d, 1H, *J* = 7.9 Hz), 6.43 (d, 1H, *J* = 7.5 Hz), 5.14 (s, 1H), 3.92 (d, 1H, *J* = 9.1 Hz), 3.04-2.98 (m, 1H), 2.92 (s, 3H), 1.57 (s, 9H), 1.44 (d, 3H, *J* = 7.1 Hz). <sup>13</sup>C NMR (125 MHz, CDCl<sub>3</sub>): δ 172.3, 140.7, 137.9, 129.2, 127.9, 127.7, 127.3, 125.1, 123.1, 121.6, 108.7, 82.0, 66.2, 65.5, 43.5, 28.1, 26.1, 13.2.; HRMS (ESI-TOF<sup>+</sup>): *m/z* Calcd. for C<sub>23</sub>H<sub>29</sub>N<sub>2</sub>O<sub>4</sub>S [(*M*+*H*)<sup>+</sup>]: 429.1848. Found: 429.1857. Chiral HPLC (Daicel Chiralpak AD-H, 5% IPA/hexanes, 0.25 mL/min, λ = 254 nm) *t*<sub>R</sub>(major) = 71.125 min, *t*<sub>R</sub>(minor) = 75.932 min; [α]<sub>D</sub><sup>18</sup> = + 58.0° (c = 0.35, CH<sub>2</sub>Cl<sub>2</sub>).

### <sup>1</sup>H NMR Spectrum of **3j**

LFF-3-80

1H 2016 12 19

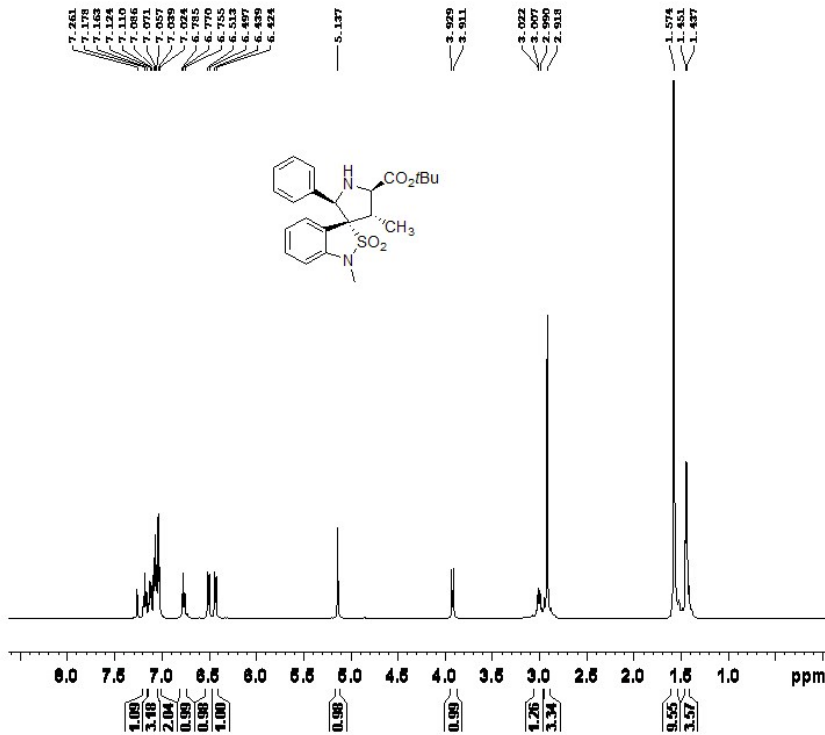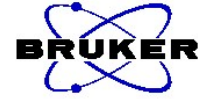

```

NAME      LFF-3-80
EXPNO    1
PROCNO   1
Date_    20161219
Time     15.24
INSTRUM  spect
PROBHD   5 mm PABBO BB-
PULPROG  zg30
TD       16384
SOLVENT  CDCl3
NS       16
DS       1
SWH      10000.000 Hz
FIDRES   0.610352 Hz
AQ       0.6193000 sec
RG       161
DW       50.000 usec
DE       6.00 usec
TE       673.2 K
D1       1.00000000 sec
TDO      1
  
```

```

----- CHANNEL f1 -----
NUC1     1H
P1       13.00 usec
PL1      2.00 dB
SF01     500.035010 MHz
SI       16384
SP       500.0300097 MHz
WDW      EM
SSB      0
LB       0.30 Hz
GB       0
PC       2.00
  
```

### <sup>13</sup>C NMR Spectrum of 3j

LFF-3-80 <sup>13</sup>C 2016 12 24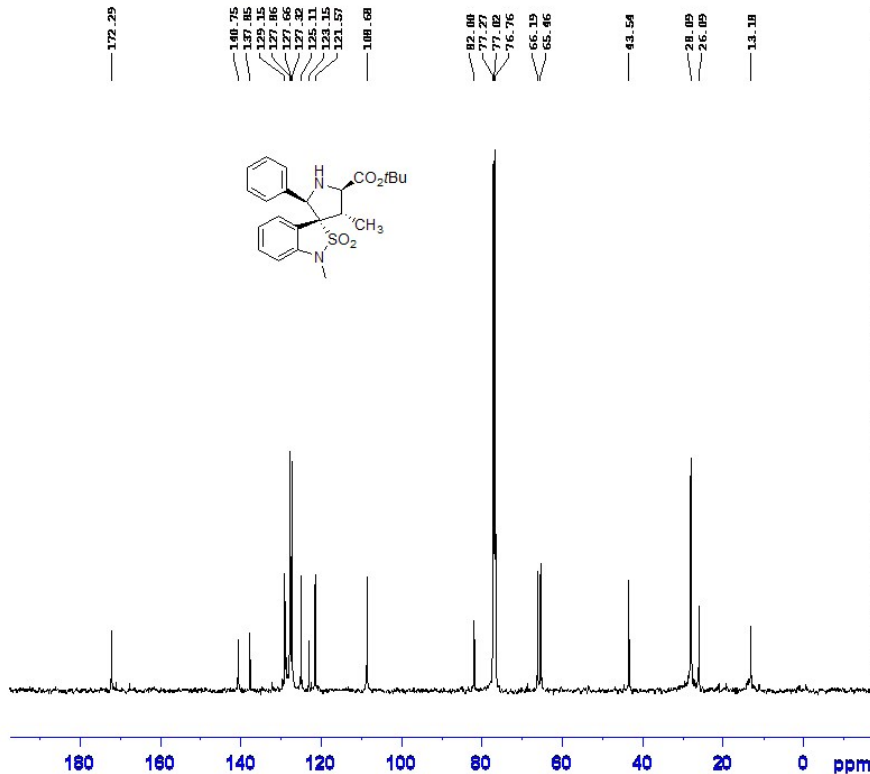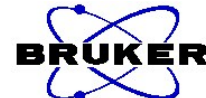

```

NAME      LFF-3-80
EXPNO    2
PROCNO   2
Date_    20161224
Time     11.27
INSTRUM  spect
PROBHD   5 mm PABBO BB-
PULPROG  zg30
TD       65536
SOLVENT  CDCl3
NS       647
DS       2
SWH      32678.738 Hz
FIDRES   0.459653 Hz
AQ       1.0027661 sec
RG       6500
DW       15.300 usec
DE       6.00 usec
TE       673.2 K
D1       2.00000000 sec
d11      0.03000000 sec
DELTA    1.89999996 sec
TDO      10
  
```

```

----- CHANNEL f1 -----
NUC1     13C
P1       12.20 usec
PL1      3.00 dB
SF01     125.7464750 MHz
  
```

```

----- CHANNEL f2 -----
CPDPRG2  waltz16
NUC2     1H
PCPD2    80.00 usec
PL2      2.00 dB
PL12     17.70 dB
PL13     17.70 dB
SF02     500.0355000 MHz
SI       32768
SF       125.7326498 MHz
WDW      EM
SSB      0
LB       10.00 Hz
GB       0
PC       3.00
  
```

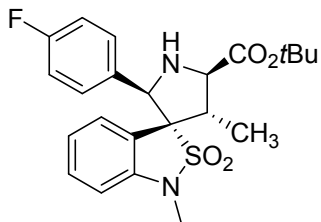

(2'*R*,3*R*,4'*S*,5'*R*)-2'-(4-fluorophenyl)-1,4'-dimethyl-5'-*tert*-butoxycarbonyl-1*H*-spiro[benzo[*c*]isothiazole-3,3'-pyrrolidine]-2,2-dioxide (**3k**)

<sup>1</sup>H NMR (500 MHz, CDCl<sub>3</sub>): δ 7.20 (t, 1H, *J* = 7.7 Hz), 7.02-6.99 (m, 2H), 6.83 (t, 1H, *J* = 7.6 Hz), 6.76 (t, 2H, *J* = 8.6 Hz), 6.52 (t, 2H, *J* = 8.6 Hz), 5.10 (s, 1H), 3.89 (d, 1H, *J* = 8.9 Hz), 3.02-2.96 (m, 1H), 2.92 (s, 3H), 1.57 (s, 9H), 1.46 (d, 3H, *J* = 7.1 Hz). <sup>13</sup>C NMR (125 MHz, CDCl<sub>3</sub>): δ 172.4, 140.8, 133.6, 129.6, 129.4, 125.2, 121.8, 114.3, 114.1, 108.8, 82.2, 76.4, 65.8, 65.6, 43.4, 28.2, 26.1, 13.5.; HRMS (ESI-TOF<sup>+</sup>): *m/z* Calcd. for C<sub>23</sub>H<sub>28</sub>FN<sub>2</sub>O<sub>4</sub>S [(M+H)<sup>+</sup>]: 447.1754. Found: 447.1759. Chiral HPLC (Daicel Chiralpak AD-H, 70% IPA/hexanes, 0.18 mL/min, λ = 254 nm) *t*<sub>R</sub>(major) = 27.143 min, *t*<sub>R</sub>(minor) = 29.060 min; [α]<sub>D</sub><sup>18</sup> = +69.4° (c = 0.33, CH<sub>2</sub>Cl<sub>2</sub>).

### <sup>1</sup>H NMR Spectrum of **3k**

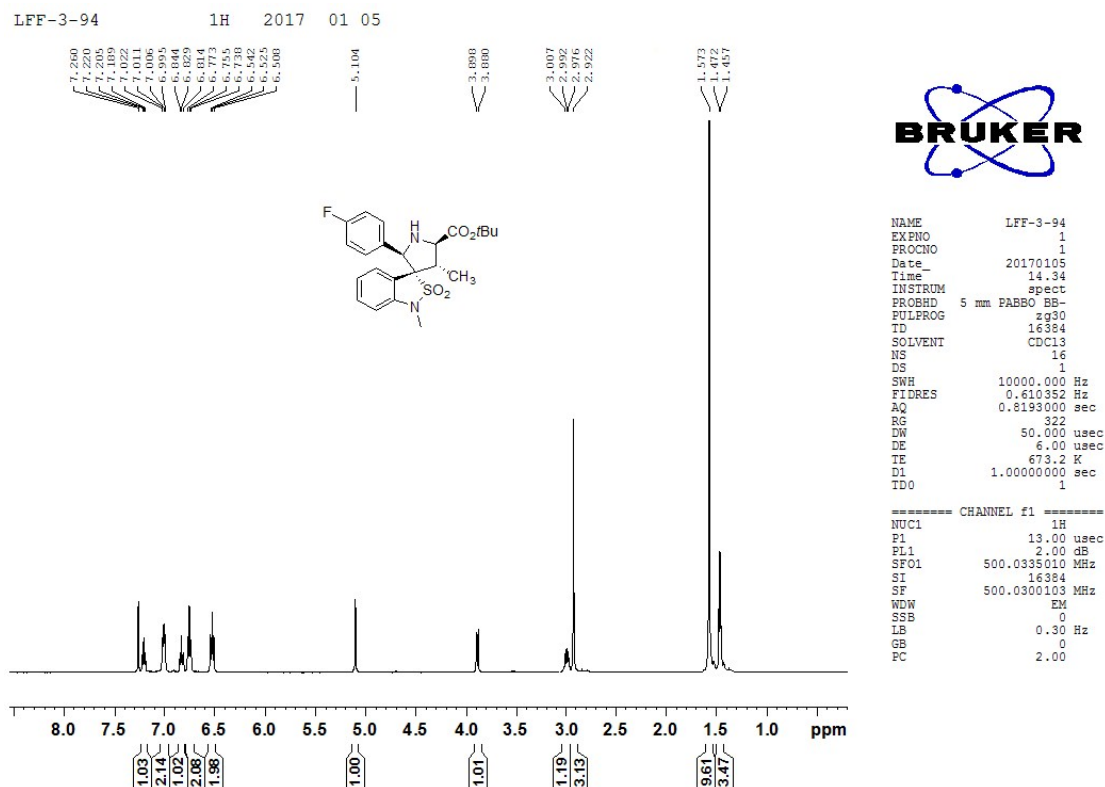

### <sup>13</sup>C NMR Spectrum of **3k**

LFF-3-94

13C 2017 01 10

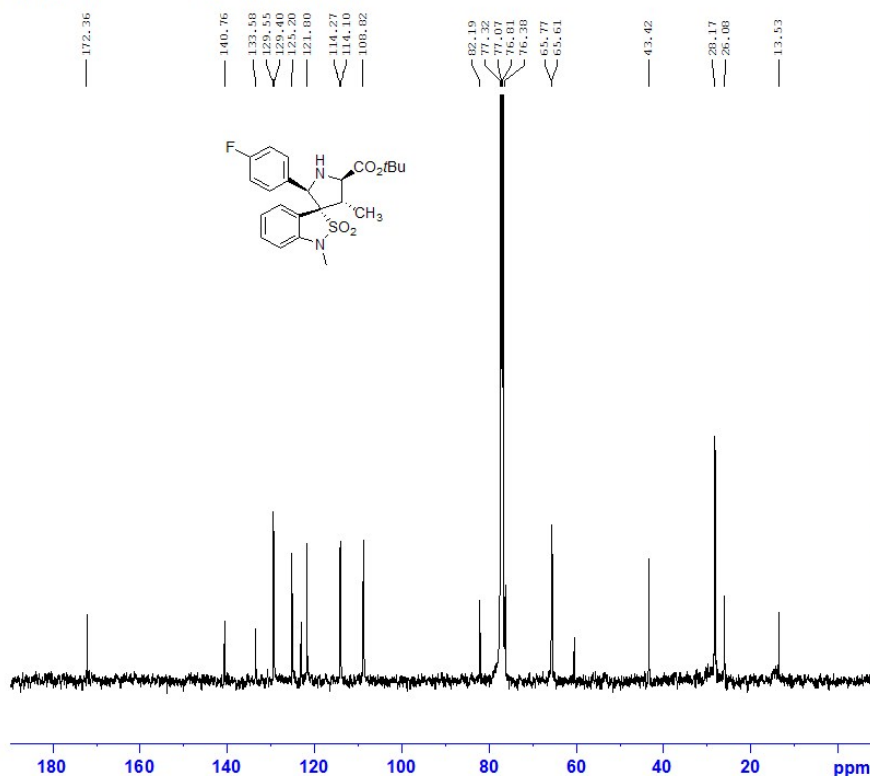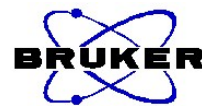

```

NAME      LFF-3-94
EXPNO     2
PROCNO    1
Date_     20170110
Time      10.46
INSTRUM   spect
PROBHD    5 mm PABBO BB-
PULPROG   zgpg30
TD         65536
SOLVENT   CDCl3
NS         1171
DS         2
SWH        32679.738 Hz
FIDRES    0.498653 Hz
AQ         1.0027661 sec
RG         1320
DW         15.300 usec
DE         6.00 usec
TE         673.2 K
D1         2.0000000 sec
d11        0.0300000 sec
DELTA     1.8999999 sec
TD0        2

```

```

===== CHANNEL f1 =====
NUC1      13C
P1        12.20 usec
PL1       3.00 dB
SFO1     125.7464750 MHz

===== CHANNEL f2 =====
CPDPRG2   waltz16
NUC2      1H
PCPD2     80.00 usec
PL2       2.00 dB
PL12      17.70 dB
PL13      17.70 dB
SFO2     500.0355000 MHz
SI        32768
SF        125.7326392 MHz
WDW       EM
SSB       0
LB        8.00 Hz
GB        0
PC        2.00

```

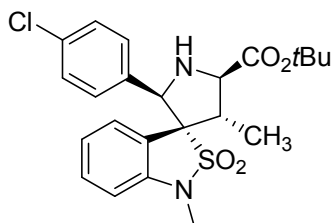

(2'*R*,3*R*,4'*S*,5'*R*)-2'-(4-chlorophenyl)-1,4'-dimethyl-5'-*tert*-butoxycarbonyl-1*H*-spiro[benzo[*c*]isothiazole-3,3'-pyrrolidine]-2,2-dioxide (**31**)

<sup>1</sup>H NMR (500 MHz, CDCl<sub>3</sub>): δ 7.21 (t, 1H, *J* = 7.8 Hz), 7.05-6.97 (m, 4H), 6.83 (t, 1H, *J* = 7.6 Hz), 6.53 (d, 2H, *J* = 7.8 Hz), 5.09 (s, 1H), 3.89 (d, 1H, *J* = 9.0 Hz), 3.00-2.95 (m, 1H), 2.93 (s, 3H), 1.57 (s, 9H), 1.45 (d, 3H, *J* = 7.2 Hz). <sup>13</sup>C NMR (125 MHz, CDCl<sub>3</sub>): δ 172.2, 140.7, 136.3, 133.4, 129.4, 129.3, 127.4, 125.1, 122.9, 121.8, 108.8, 82.1, 76.3, 65.6, 65.5, 43.3, 28.1, 26.0, 13.3.; HRMS (ESI-TOF<sup>+</sup>): *m/z* Calcd. for C<sub>23</sub>H<sub>28</sub>ClN<sub>2</sub>O<sub>4</sub>S [(M+H)<sup>+</sup>]: 463.1458. Found: 463.1450. Chiral HPLC (Daicel Chiralpak AD-H, 70% IPA/hexanes, 0.2 mL/min, λ = 254 nm) *t*<sub>R</sub>(major) = 24.554 min, *t*<sub>R</sub>(minor) = 26.050 min; [α]<sub>D</sub><sup>18</sup> = +62.1° (c = 0.34, CH<sub>2</sub>Cl<sub>2</sub>).

### <sup>1</sup>H NMR Spectrum of **31**

LFF-3-81 1H 2016 12 19

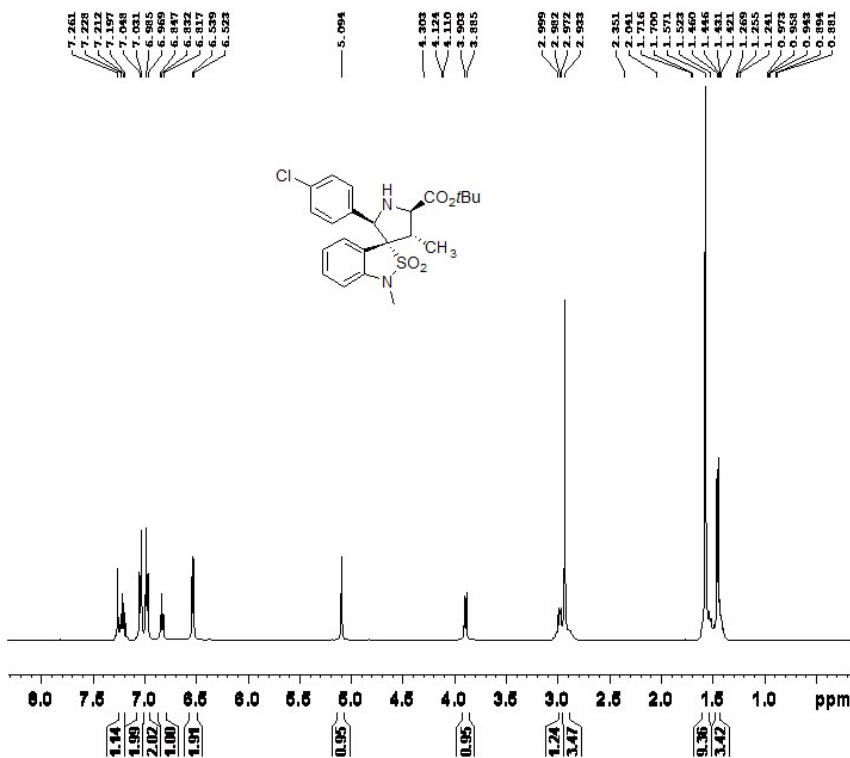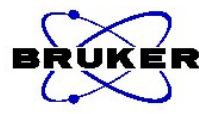

```

NAME          LFF-3-81
EXPNO         1
PROCNO        1
Date_         20161219
Time         15.29
INSTRUM       spect
PROBHD        5 mm PABBO BB-
PULPROG       zg30
TD            16384
SOLVENT       CDCl3
NS            16
DS            1
SWH           10000.000 Hz
FIDRES        0.610352 Hz
AQ            0.6193000 sec
RG            161
DW            50.000 usec
DE            6.00 usec
TE            673.2 K
D1            1.0000000 sec
TD0           1

----- CHANNEL f1 -----
NUC1          1H
P1            13.00 usec
PL1           2.00 dB
SFO1         500.0338010 MHz
SI            16384
SF           500.0330000 MHz
WDW#          EM
SSB           0
LB            0.30 Hz
GB            0
PC            2.00
    
```

**<sup>13</sup>C NMR Spectrum of 31**

LFF-3-81 <sup>13</sup>C 2016 12 22

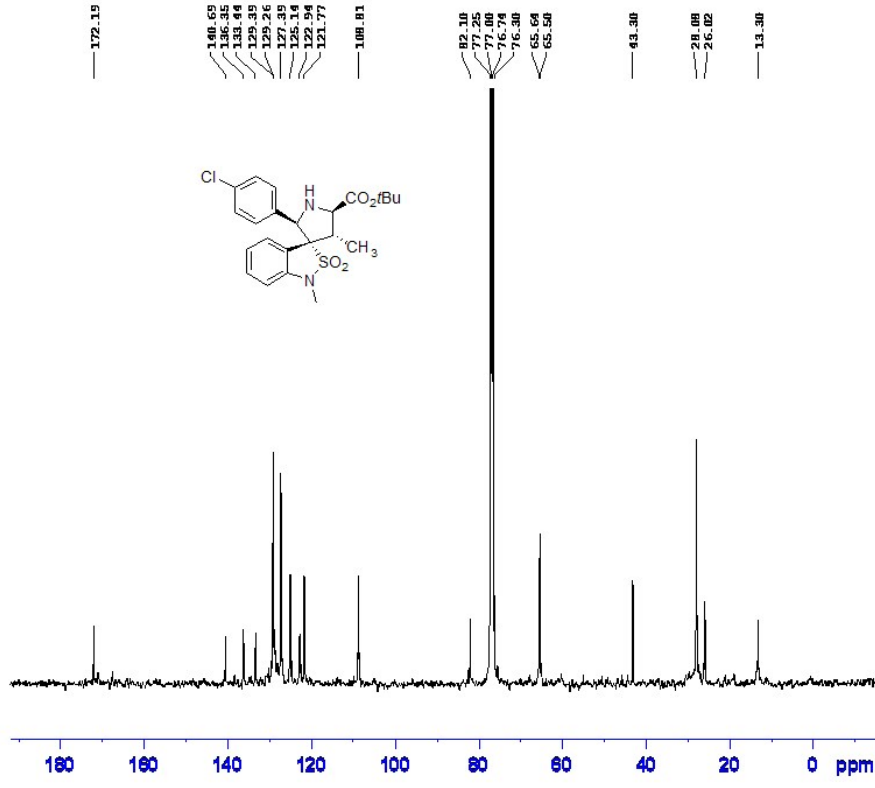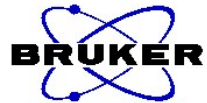

```

NAME          LFF-3-81
EXPNO         2
PROCNO        1
Date_         20161222
Time         16.55
INSTRUM       spect
PROBHD        5 mm PABBO BB-
PULPROG       zg30
TD            65536
SOLVENT       CDCl3
NS            1836
DS            2
SWH           32679.796 Hz
FIDRES        0.486533 Hz
AQ            1.0027661 sec
RG            5790
DW            15.300 usec
DE            6.00 usec
TE            673.2 K
D1            2.0000000 sec
d11           0.0300000 sec
DELTA        1.89999998 sec
TD0           10

----- CHANNEL f1 -----
NUC1          13C
P1            12.20 usec
PL1           3.00 dB
SFO1         125.7464750 MHz

----- CHANNEL f2 -----
CPDPRG2       waltz16
NUC2          1H
PCPD2         80.00 usec
PL2           17.70 dB
PL12          17.70 dB
SFO2         500.0355000 MHz
SI            32768
SF           125.7326498 MHz
WDW#          EM
SSB           0
LB            12.00 Hz
GB            0
PC            3.00
    
```



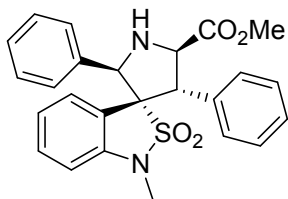

(2'*R*,3*R*,4'*S*,5'*R*)-1-methyl-2',4'-diphenyl-5'-methoxycarbonyl-1*H*-spiro[benzo[*c*]isothiazole-3,3'-pyrrolidine]-2,2-dioxide (**3m**)

<sup>1</sup>H NMR (500 MHz, CDCl<sub>3</sub>): δ 7.28-7.26 (m, 5H), 7.19-7.09 (m, 6H), 6.95-6.89 (m, 2H), 6.29 (d, 1H, *J* = 7.9 Hz), 5.48 (s, 1H), 4.68 (s, 1H), 4.15 (d, 1H, *J* = 8.7 Hz), 3.80 (s, 3H), 2.98 (br, 1H), 2.57 (s, 3H).

<sup>13</sup>C NMR (125 MHz, CDCl<sub>3</sub>): δ 172.9, 140.6, 136.4, 136.0, 129.3, 128.3, 128.1, 128.0, 127.3, 125.6, 124.8, 121.6, 108.8, 68.0, 64.8, 55.6, 52.6, 26.0.; HRMS (ESI-TOF<sup>+</sup>): *m/z* Calcd. for C<sub>25</sub>H<sub>25</sub>N<sub>2</sub>O<sub>4</sub>S [(M+H)<sup>+</sup>]: 449.1535. Found: 449.1539. Chiral HPLC (Daicel Chiralpak AD-H, 20% IPA/hexanes, 0.8 mL/min, λ = 254 nm) *t*<sub>R</sub>(major) = 26.979 min, *t*<sub>R</sub>(minor) = 35.305 min; [α]<sub>D</sub><sup>25</sup> = +70.6° (c = 0.47, CH<sub>2</sub>Cl<sub>2</sub>).

### <sup>1</sup>H NMR Spectrum of 3m

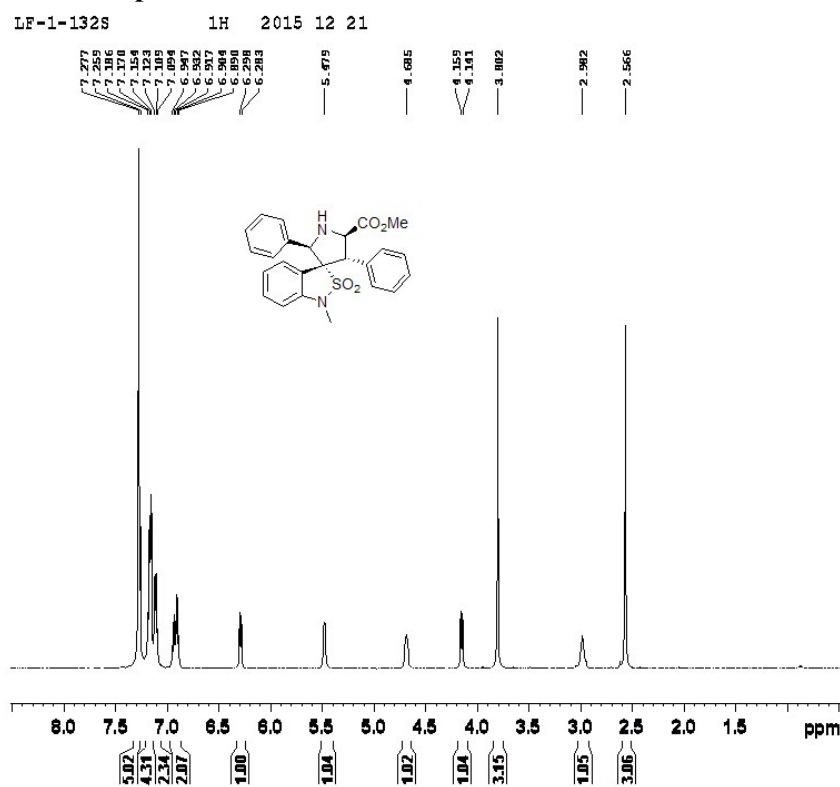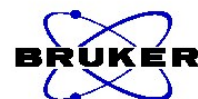

```

NAME          LF-1-132S
EXPNO         1
PROCNO        1
Date_         20151221
Time          15.47
INSTRUM       spect
PROBHD        5 mm PABBO BB-
PULPROG       zg30
TD            32768
SOLVENT       CDCl3
NS            6
DS            1
SWH           10000.000 Hz
FIDRES        0.305176 Hz
AQ            1.6365000 sec
RG            406
DW            50.000 usec
DE            6.00 usec
TE            673.2 K
D1            1.0000000 sec
TDO           1

----- CHANNEL f1 -----
NUC1          1H
P1            13.00 usec
PL1           2.00 dB
SFO1          500.0335010 MHz
SI            16384
SF            500.0300109 MHz
WDW           EM
SSB           0
LB            0.30 Hz
GB            0
PC            4.00

```

### <sup>13</sup>C NMR Spectrum of 3m

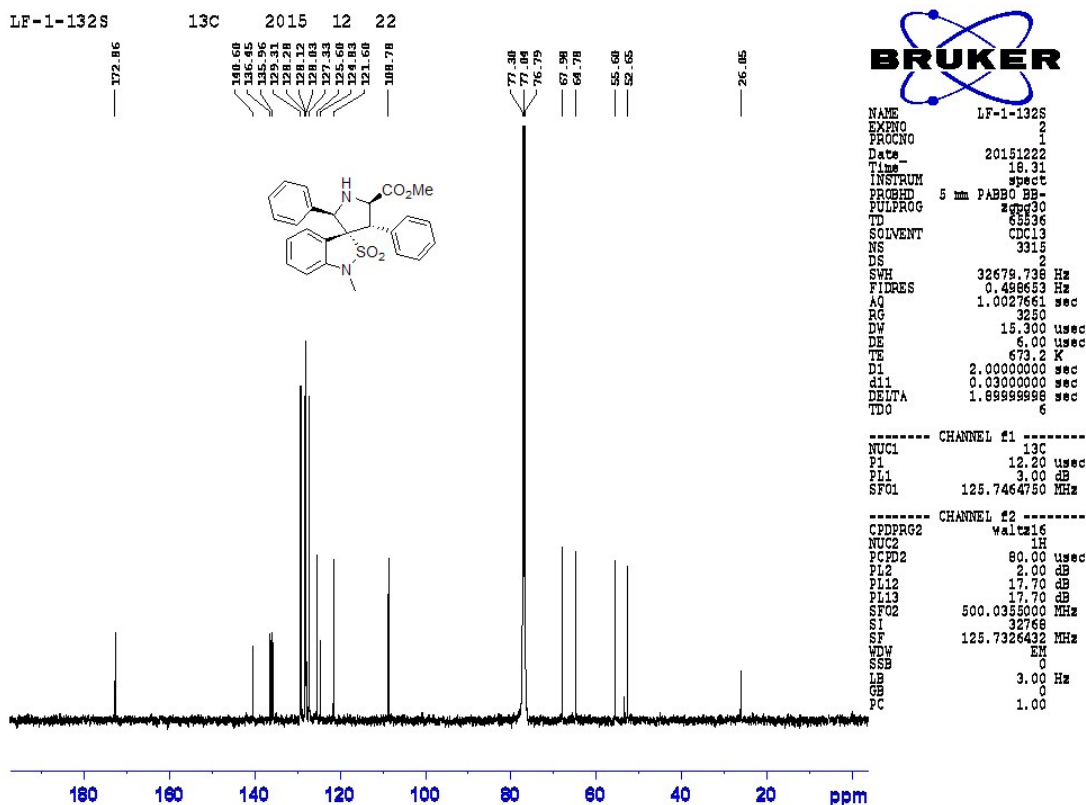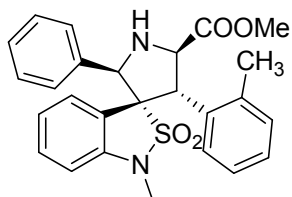

(2'*R*,3*R*,4'*S*,5'*R*)-1-methyl-2'-phenyl-4'-(*o*-tolyl)-5'-methoxycarbonyl-1*H*-spiro[benzo[*c*]isothiazole-3,3'-pyrrolidine]-2,2-dioxide (**3n**)

<sup>1</sup>H NMR (500 MHz, CDCl<sub>3</sub>): δ 7.76 (d, 1H, *J* = 7.8 Hz), 7.54 (d, 1H, *J* = 7.5 Hz), 7.37 (t, 1H, *J* = 7.6 Hz), 7.23 (t, 1H, *J* = 7.5 Hz), 7.19-7.14 (m, 2H), 7.11-7.06 (m, 2H), 6.98-6.97 (m, 4H), 6.18 (d, 1H, *J* = 7.8 Hz), 5.38 (s, 1H), 4.66 (d, 1H, *J* = 7.2 Hz), 4.50 (s, 1H), 3.83 (s, 3H), 2.84 (br, 1H), 2.54 (s, 3H), 2.26 (s, 3H). <sup>13</sup>C NMR (125 MHz, CDCl<sub>3</sub>): δ 172.6, 140.1, 137.9, 136.9, 134.1, 130.2, 129.2, 128.1, 127.8, 126.7, 126.3, 126.2, 124.8, 121.6, 108.3, 75.6, 71.2, 67.6, 52.6, 49.0, 25.3, 20.4.; HRMS (ESI-TOF<sup>+</sup>): *m/z* Calcd. for C<sub>26</sub>H<sub>27</sub>N<sub>2</sub>O<sub>4</sub>S [(*M*+*H*)<sup>+</sup>]: 463.1692. Found: 463.1702. Chiral HPLC (Daicel Chiralpak AD-H, 30% IPA/hexanes, 0.9 mL/min, λ = 254 nm) *t*<sub>R</sub>(major) = 17.496 min, *t*<sub>R</sub>(minor) = 19.332 min; [α]<sub>D</sub><sup>25</sup> = +20.0° (c = 0.28, CH<sub>2</sub>Cl<sub>2</sub>).

#### <sup>1</sup>H NMR Spectrum of **3n**

LF-1-136 1H 2015 12 24

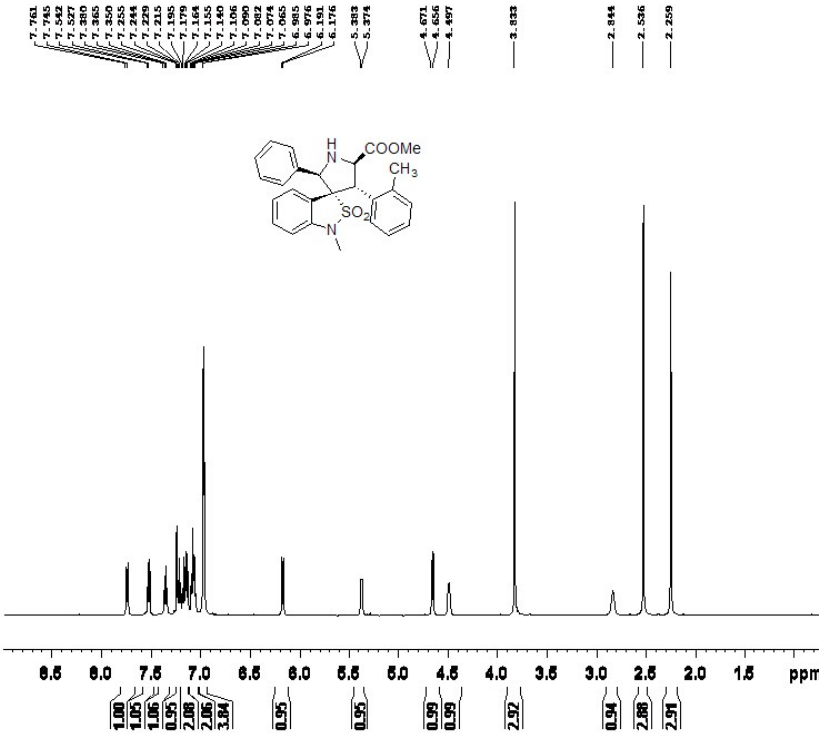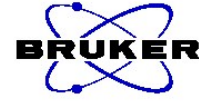

```

NAME LF-1-136
EXPNO 1
PROCNO 1
DATE_ 20151224
TIME 15.33
INSTRUM spect
PROBHD 5 mm F4BBO BB-
PULPROG zg30
TD 32768
SOLVENT CDCl3
NS 6
DS 1
SWH 10000.000 Hz
FIDRES 0.305176 Hz
AQ 1.6385000 sec
RG 406
DW 50.000 usec
DE 6.00 usec
TE 673.2 K
D1 1.00000000 sec
TDO 1
----- CHANNEL f1 -----
NUC1 1H
P1 13.00 usec
PL1 2.00 dB
SFO1 500.0335010 MHz
SI 16384
SF 300.0300129 MHz
WDW EM
SSB 0
LB 0.30 Hz
GB 0
FC 4.00
  
```

**<sup>13</sup>C NMR Spectrum of 3n**

LF-1-136 13C 2015 12 24

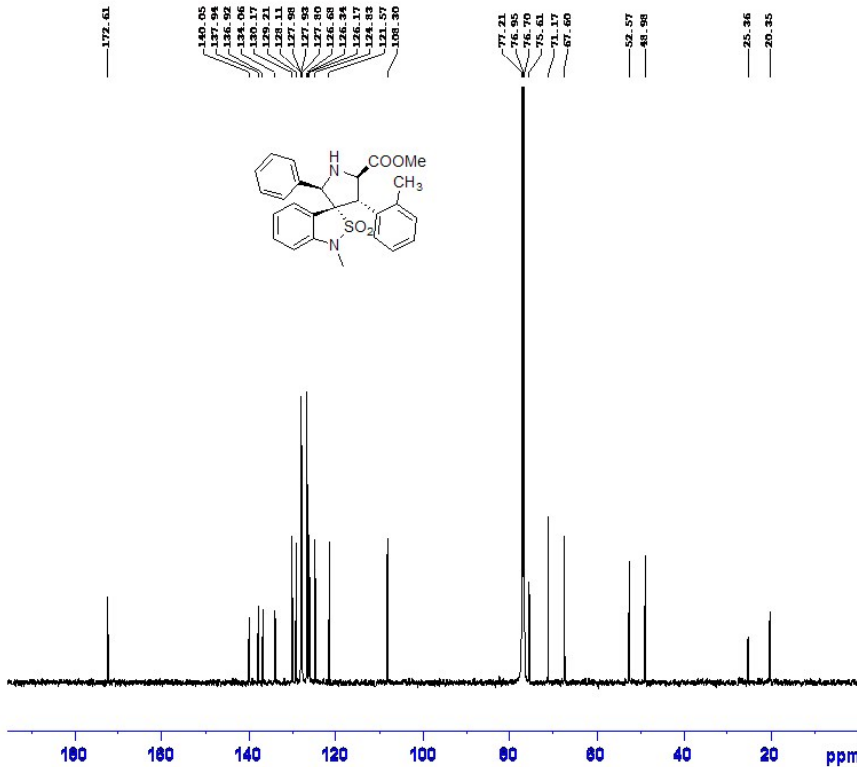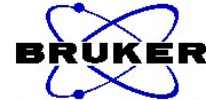

```

NAME LF-1-136
EXPNO 2
PROCNO 1
DATE_ 20151224
TIME 18.44
INSTRUM spect
PROBHD 5 mm F4BBO BB-
PULPROG zgpg30
TD 65536
SOLVENT CDCl3
NS 3660
DS 2
SWH 32679.736 Hz
FIDRES 0.498653 Hz
AQ 1.0027661 sec
RG 6500
DW 15.300 usec
DE 6.00 usec
TE 673.2 K
D1 2.00000000 sec
d11 0.03000000 sec
DELTA 1.89999996 sec
TDO 10
----- CHANNEL f1 -----
NUC1 13C
P1 12.20 usec
PL1 3.00 dB
SFO1 125.7464750 MHz
----- CHANNEL f2 -----
CPDPRG2 waltz16
NUC2 1H
PCPD2 60.00 usec
PL2 2.00 dB
PL12 17.70 dB
PL13 17.70 dB
SFO2 500.0355000 MHz
SI 32768
SF 125.7326512 MHz
WDW EM
SSB 0
LB 3.00 Hz
GB 0
FC 1.00
  
```

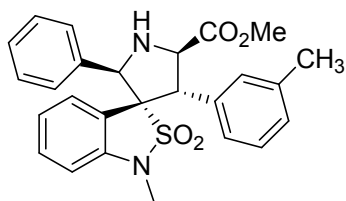

(2'*R*,3*R*,4'*S*,5'*R*)-1-methyl-2'-phenyl-4'-(*m*-tolyl)-5'-methoxycarbonyl-1*H*-spiro[benzo[*c*]isothiazole-3,3'-pyrrolidine]-2,2-dioxide (**30**)

<sup>1</sup>H NMR (500 MHz, CDCl<sub>3</sub>): δ 7.28-7.10 (m, 9H), 7.06 (s, 1H), 7.01-6.96 (m, 2H), 6.29 (d, 1H, *J* = 7.9 Hz), 5.48 (s, 1H), 4.66 (d, 1H, *J* = 8.4 Hz), 4.15 (d, 1H, *J* = 8.5 Hz), 3.83 (s, 3H), 2.99 (br, 1H), 2.58 (s, 3H), 2.31 (s, 3H). <sup>13</sup>C NMR (125 MHz, CDCl<sub>3</sub>): δ 172.8, 140.5, 137.6, 136.1, 130.2, 129.3, 128.8, 128.2, 128.0, 127.2, 126.2, 125.5, 125.0, 121.5, 108.6, 68.3, 65.1, 55.4, 52.6, 26.0, 21.4.; HRMS (ESI-TOF<sup>+</sup>): *m/z* Calcd. for C<sub>26</sub>H<sub>27</sub>N<sub>2</sub>O<sub>4</sub>S [(M+H)<sup>+</sup>]: 463.1692. Found: 463.1695. Chiral HPLC (Daicel Chiralpak AD-H, 30% IPA/hexanes, 0.9 mL/min, λ = 254 nm) *t*<sub>R</sub>(major) = 11.072 min, *t*<sub>R</sub>(minor) = 16.708 min; [α]<sub>D</sub><sup>25</sup> = +68.4° (c = 0.38, CH<sub>2</sub>Cl<sub>2</sub>).

### <sup>1</sup>H NMR Spectrum of **30**

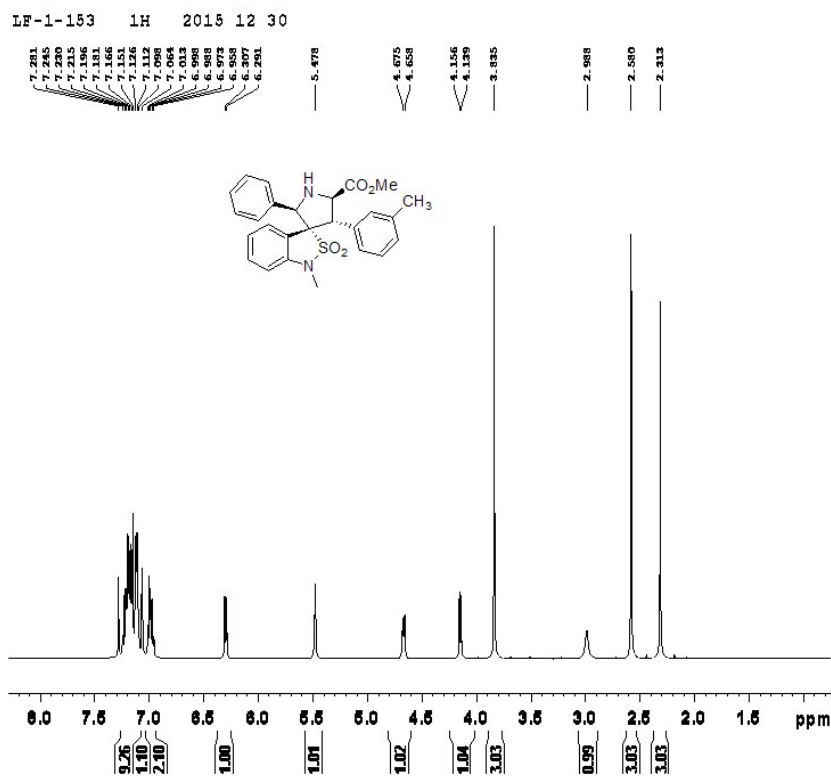

### <sup>13</sup>C NMR Spectrum of **30**

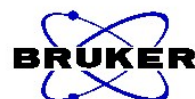

```

NAME          LF-1-153
EXPNO         1
PROCNO        1
Date_         20151230
Time          16.48
INSTRUM       spect
PROBHD        5 mm F4BBO BB-
PULPROG       zg30
TD            32768
SOLVENT       CDCl3
NS            6
DS            1
SWH           10000.000 Hz
FIDRES        0.305176 Hz
AQ            1.6365000 sec
RG            362
DW            50.000 usec
DE            6.00 usec
TE            293.2 K
D1            2.00000000 sec
TDO           1

===== CHANNEL f1 =====
NUC1          1H
P1            13.00 usec
PL1           2.00 dB
SFO1          500.0335010 MHz
SI            1.6384
SF            500.0300000 MHz
WDW           EM
SSB           0
LB            0.30 Hz
GB            0
PC            4.00

```

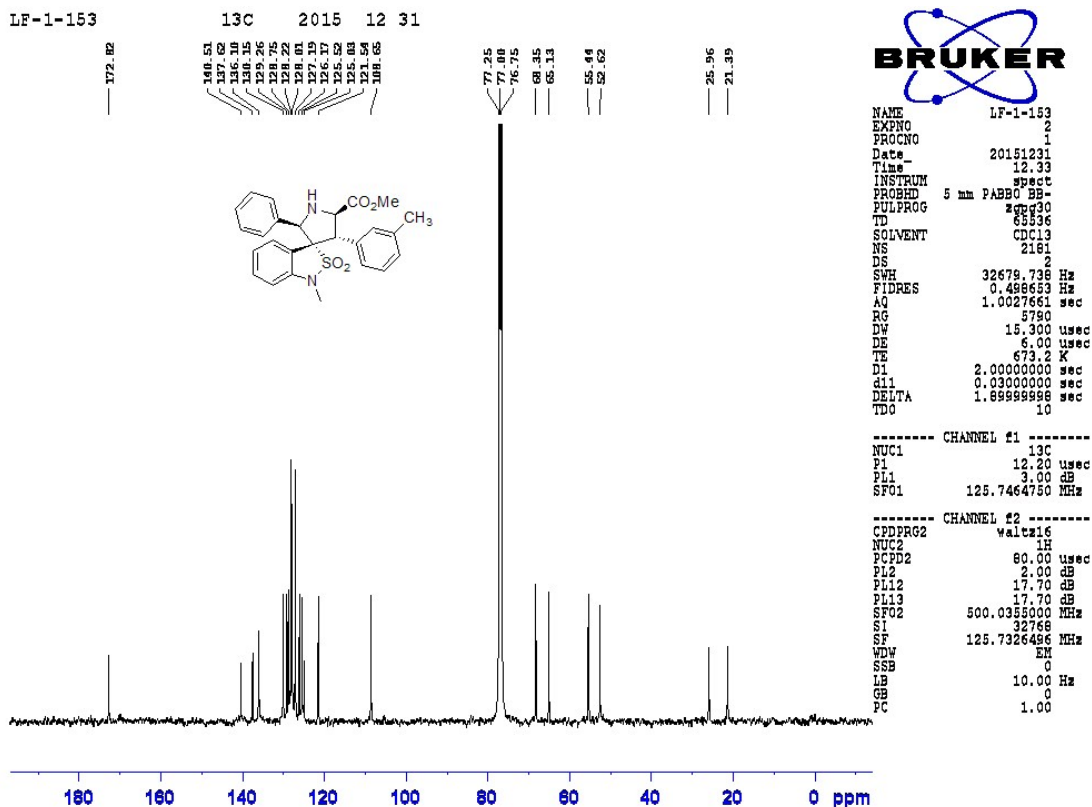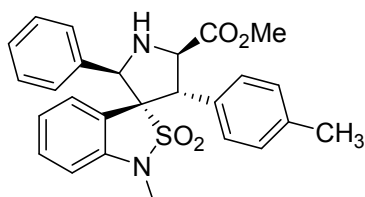

(2'*R*,3*R*,4'*S*,5'*R*)-1-methyl-2'-phenyl-4'-(*p*-tolyl)-5'-methoxycarbonyl-1*H*-spiro[benzo[*c*]isothiazole-3,3'-pyrrolidine]-2,2-dioxide (**3p**)

$^1\text{H}$  NMR (500 MHz,  $\text{CDCl}_3$ ):  $\delta$  7.25-7.07 (m, 10H), 6.98-6.92 (m, 2H), 6.28 (d, 1H,  $J = 7.9$  Hz), 5.44 (s, 1H), 4.63 (d, 1H,  $J = 8.3$  Hz), 4.13 (d, 1H,  $J = 8.5$  Hz), 3.80 (s, 3H), 2.97 (br, 1H), 2.58 (s, 3H), 2.31 (s, 3H).  $^{13}\text{C}$  NMR (125 MHz,  $\text{CDCl}_3$ ):  $\delta$  172.9, 140.6, 137.6, 136.3, 133.2, 129.3, 129.2, 128.9, 128.3, 128.0, 127.2, 125.6, 125.0, 121.5, 108.7, 68.3, 65.2, 55.2, 52.6, 26.0, 21.2.; HRMS (ESI-TOF $^+$ ):  $m/z$  Calcd. for  $\text{C}_{26}\text{H}_{27}\text{N}_2\text{O}_4\text{S}$  [( $\text{M}+\text{H}$ ) $^+$ ]: 463.1692. Found: 463.1689. Chiral HPLC (Daicel Chiralpak AD-H, 20% IPA/hexanes, 0.8 mL/min,  $\lambda = 254$  nm)  $t_{\text{R}}$ (major) = 37.084 min,  $t_{\text{R}}$ (minor) = 39.304 min;  $[\alpha]_{\text{D}}^{25} = +85.9^\circ$  ( $c = 0.58$ ,  $\text{CH}_2\text{Cl}_2$ ).

### $^1\text{H}$ NMR Spectrum of **3p**

LF-1-1338 1H 2015 12 21

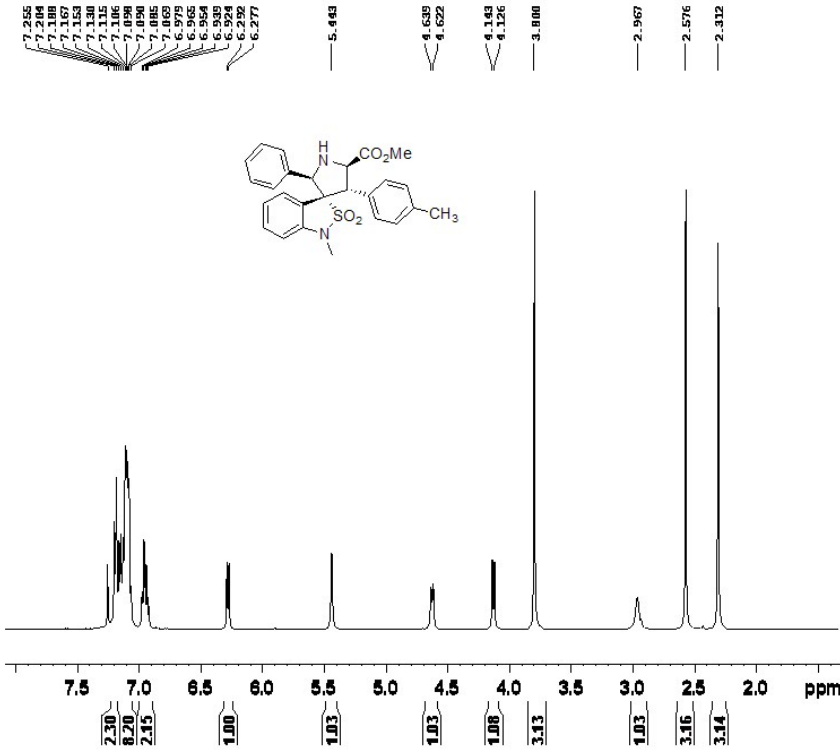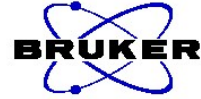

```

NAME LF-1-1338
EXPNO 1
PROCNO 1
Date_ 20151221
Time 15.42
INSTRUM spect
PROBHD 5 mm F400 BB-
PULPROG zg30
TD 32768
SOLVENT cdcl3
NS 8
DS 1
SWH 10000.000 Hz
FIDRES 0.305176 Hz
AQ 1.6365000 sec
RG 228
DW 50.000 usec
DE 6.00 usec
TE 673.2 K
D1 1.00000000 sec
TDO 1

----- CHANNEL f1 -----
NUC1 1H
P1 13.00 usec
PL1 2.00 dB
SFO1 500.0335010 MHz
SI 16384
SF 500.0300129 MHz
WDW EM
SSB 0
LB 0.30 Hz
GB 0
FC 4.00
    
```

**<sup>13</sup>C NMR Spectrum of 3p**

LF-1-1338 13C 2015 12 22

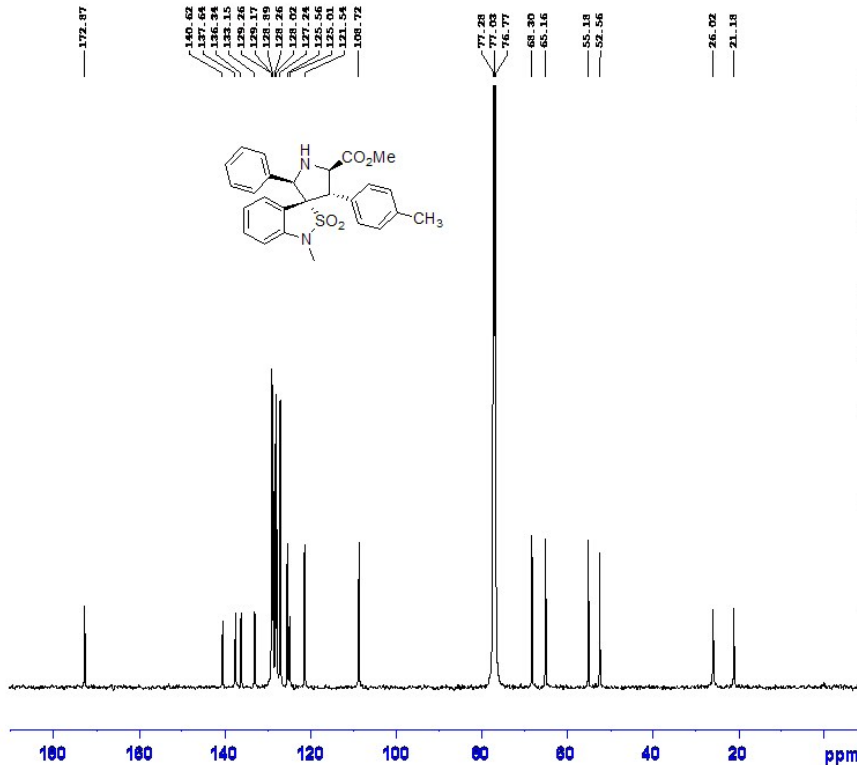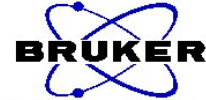

```

NAME LF-1-1338
EXPNO 2
PROCNO 1
Date_ 20151222
Time 21.26
INSTRUM spect
PROBHD 5 mm F400 BB-
PULPROG zgpg30
TD 65536
SOLVENT cdcl3
NS 6000
DS 2
SWH 32679.738 Hz
FIDRES 0.498663 Hz
AQ 1.0027661 sec
RG 3250
DW 15.300 usec
DE 6.00 usec
TE 673.2 K
D1 2.00000000 sec
d11 0.03000000 sec
DELTA 1.89999996 sec
TDO 6

----- CHANNEL f1 -----
NUC1 13C
P1 12.20 usec
PL1 3.00 dB
SFO1 125.7464750 MHz

----- CHANNEL f2 -----
CPDPRG2 waltz16
NUC2 1H
PCPD2 80.00 usec
PL2 2.00 dB
PL12 17.70 dB
PL13 17.70 dB
SFO2 500.0355000 MHz
SI 32768
SF 125.7326432 MHz
WDW EM
SSB 0
LB 10.00 Hz
GB 0
FC 1.00
    
```

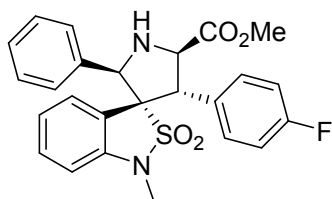

(2'*R*,3*R*,4'*S*,5'*R*)-4'-(4-fluorophenyl)-1-methyl-2'-phenyl--5'-methoxycarbonyl-1*H*-spiro[benzo[*c*]isothiazole-3,3'-pyrrolidine]-2,2-dioxide (**3q**)

<sup>1</sup>H NMR (500 MHz, CDCl<sub>3</sub>): δ 7.26-7.14 (m, 8H), 6.95-6.92 (m, 2H), 6.89 (t, 1H, *J* = 7.7 Hz), 6.73 (d, 1H, *J* = 7.6 Hz), 6.31 (d, 1H, *J* = 7.9 Hz), 5.48 (s, 1H), 4.67 (d, 1H, *J* = 9.0 Hz), 4.11 (d, 1H, *J* = 9.0 Hz), 3.80 (s, 3H), 2.61 (s, 3H). <sup>13</sup>C NMR (125 MHz, CDCl<sub>3</sub>) δ 172.8, 140.7, 136.9, 131.0, 129.4, 128.3, 128.2, 127.5, 125.6, 124.4, 121.6, 115.1, 114.9, 108.8, 67.2, 64.2, 55.0, 52.7, 26.1.; HRMS (ESI-TOF<sup>+</sup>): *m/z* Calcd. for C<sub>25</sub>H<sub>24</sub>FN<sub>2</sub>O<sub>4</sub>S [(*M*+*H*)<sup>+</sup>]: 467.1441. Found: 467.1448. Chiral HPLC (Daicel Chiralpak AD-H, 30% IPA/hexanes, 0.9 mL/min, λ = 254 nm) *t*<sub>R</sub>(major) = 24.426 min, *t*<sub>R</sub>(minor) = 27.713 min; [α]<sub>D</sub><sup>25</sup> = +19.5° (c = 0.19, CH<sub>2</sub>Cl<sub>2</sub>).

### <sup>1</sup>H NMR Spectrum of **3q**

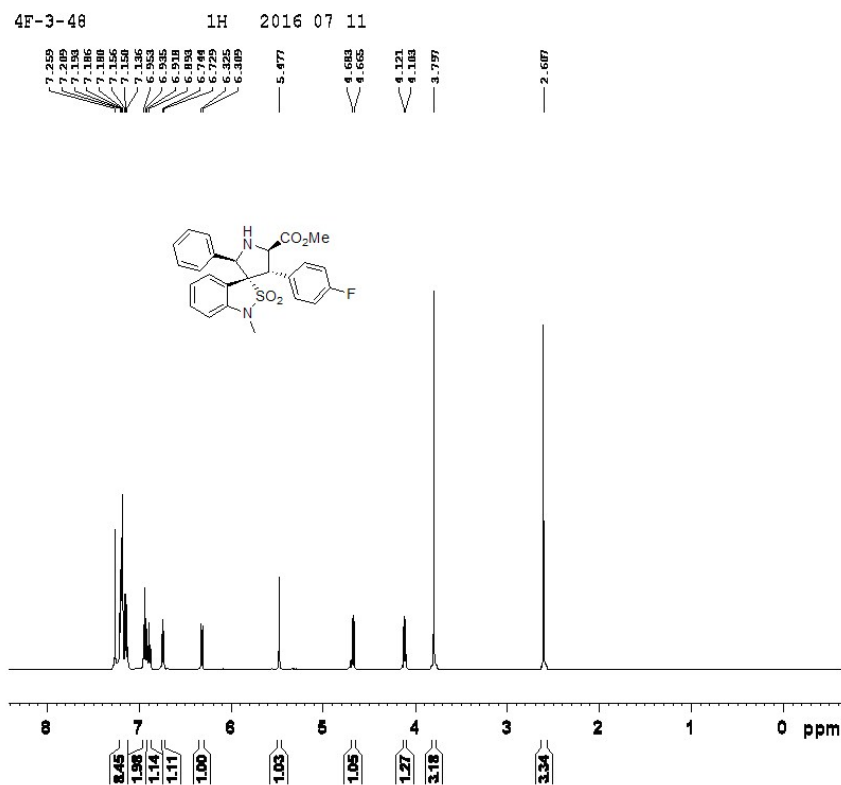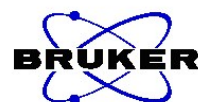

```

NAME          LFF-3-48
EXPNO         1
PROCNO        1
Date_         20160711
Time         16.41
INSTRUM       spect
PROBHD        5 mm PABBO EB-
PULPROG       zg30
TD            16384
SOLVENT       CDCl3
NS            16
DS            1
SWH           10000.000 Hz
FIDRES        0.610352 Hz
AQ            0.8193000 sec
RG            812
DF            50.000 usec
DE            6.00 usec
TE            673.2 K
D1            1.00000000 sec
TDO           1
----- CHANNEL f1 -----
NUC1          1H
P1            13.00 usec
PL1           2.00 dB
SFO1          500.0335010 MHz
SI            16384
SF            500.0300110 MHz
WDW           EM
SSB           0
LB            0.30 Hz
GB            0
PC            2.00
  
```

### <sup>13</sup>C NMR Spectrum of **3q**

LFF-3-48 13C 20160712

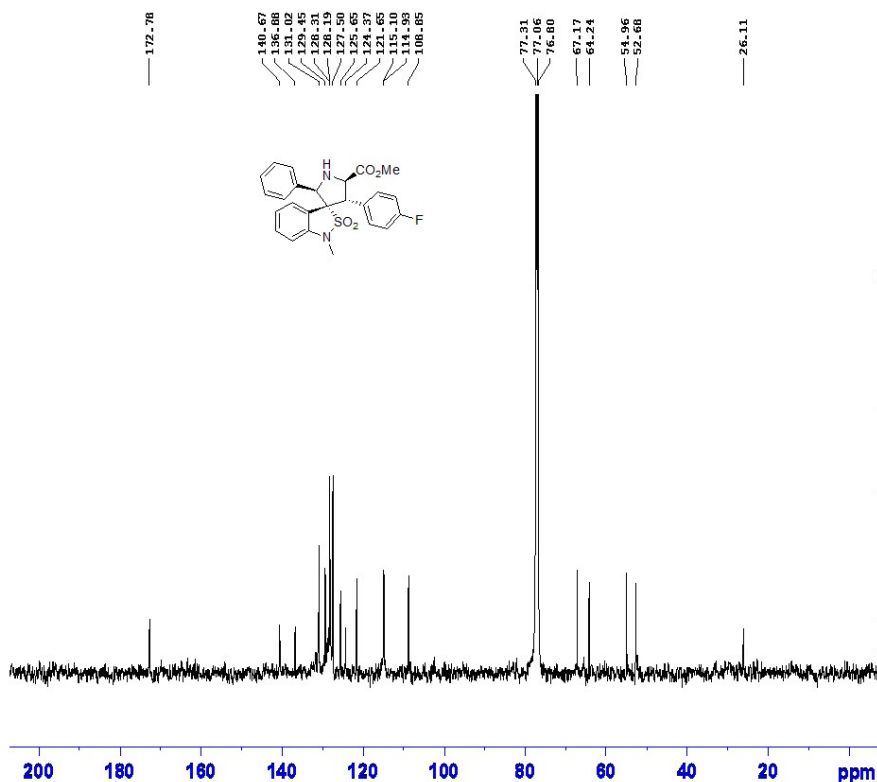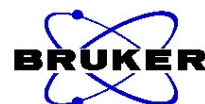

```

NAME      LFF-3-48
EXPNO     2
PROCNO    1
Date_     20160712
Time      18.14
INSTRUM   spect
PROBHD    5 mm PABBO BB-
PULPROG   zgpg30
TD        65536
SOLVENT   CDCl3
NS        1000
DS        2
SWH       32679.738 Hz
FIDRES    0.498653 Hz
AQ        1.0027661 sec
RG        1820
DW        15.300 usec
DE        6.00 usec
TE        673.2 K
D1        2.00000000 sec
d11       0.03000000 sec
DELTA     1.89999998 sec
TD0       2

```

```

----- CHANNEL f1 -----
NUC1      13C
P1        12.20 usec
PL1       3.00 dB
SFO1     125.7464750 MHz

----- CHANNEL f2 -----
CPDPRG2   wa1tz16
NUC2      1H
PCPD2     80.00 usec
PL2       2.00 dB
PL12     17.70 dB
PL13     17.70 dB
SFO2     500.0355000 MHz
SI        32768
SF        125.7326392 MHz
WDW       EM
SSB       0
LB        6.00 Hz
GB        0
PC        2.00

```

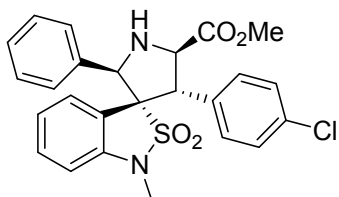

(2'*R*,3*R*,4'*S*,5'*R*)-4'-(4-chlorophenyl)-1-methyl-2'-phenyl-5'-methoxycarbonyl-1*H*-spiro[benzo[*c*]isothiazole-3,3'-pyrrolidine]-2,2-dioxide (**3r**)

<sup>1</sup>H NMR (500 MHz, CDCl<sub>3</sub>): δ 7.25-7.11 (m, 10H), 6.89 (t, 1H, *J* = 7.6 Hz), 6.72 (d, 1H, *J* = 7.6 Hz), 6.32 (d, 1H, *J* = 7.9 Hz), 5.46 (s, 1H), 4.66 (s, 1H), 4.09 (d, 1H, *J* = 9.1 Hz), 3.79 (s, 3H), 2.99 (br, 1H), 2.61 (s, 3H). <sup>13</sup>C NMR (125 MHz, CDCl<sub>3</sub>): δ 172.6, 140.6, 136.8, 133.9, 133.8, 130.6, 129.4, 128.2, 128.1, 127.4, 125.6, 124.2, 121.6, 108.8, 67.1, 64.0, 54.9, 52.6, 26.1.; HRMS (ESI-TOF<sup>+</sup>): *m/z* Calcd. for C<sub>25</sub>H<sub>24</sub>ClN<sub>2</sub>O<sub>4</sub>S [(M+H)<sup>+</sup>]: 483.1145. Found: 483.1151. Chiral HPLC (Daicel Chiralpak AD-H, 20% IPA/hexanes, 0.8 mL/min, λ = 254 nm) *t*<sub>R</sub>(major) = 48.852 min, *t*<sub>R</sub>(minor) = 54.080 min; [α]<sub>D</sub><sup>25</sup> = +61.6° (*c* = 0.56, CH<sub>2</sub>Cl<sub>2</sub>).

### <sup>1</sup>H NMR Spectrum of **3r**



LF-1-135 1H 2015 12 24

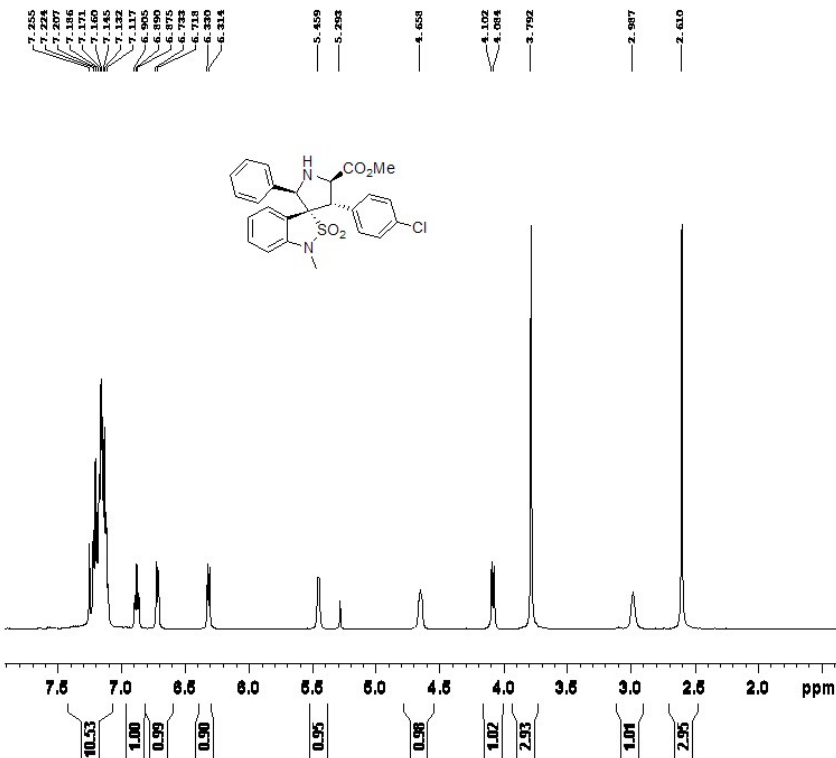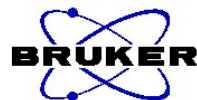

```

NAME LF-1-135
EXPNO 1
PROCNO 1
Date_ 20151224
Time_ 15.29
INSTRUM spect
PROBHD 5 mm FAPBQ BB-
PULPROG zg30
TD 32768
SOLVENT CDCl3
NS 8
DS 1
SWH 10000.000 Hz
FIDRES 0.305176 Hz
AQ 1.6385000 sec
RG 406
DW 50.000 usec
DE 6.00 usec
TE 673.2 K
DL 1.0000000 sec
TDO 1
----- CHANNEL f1 -----
NUC1 1H
P1 13.00 usec
PL1 2.00 dB
SFO1 500.0335010 MHz
SI 16384
SF 500.0300129 MHz
WDW EM
SSB 0
LB 0.30 Hz
GB 0
PC 4.00
  
```

### <sup>13</sup>C NMR Spectrum of 3r

LF-1-135 13C 2015 12 24

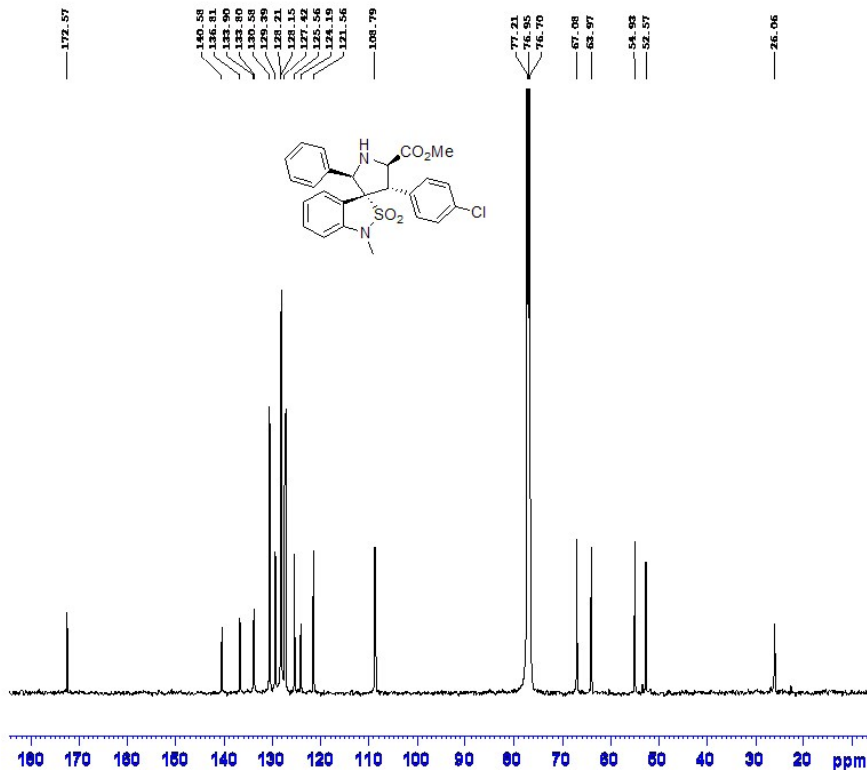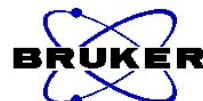

```

NAME LF-1-135
EXPNO 2
PROCNO 1
Date_ 20151224
Time_ 21.36
INSTRUM spect
PROBHD 5 mm FAPBQ BB-
PULPROG zgpg30
TD 65536
SOLVENT CDCl3
NS 10000
DS 2
SWH 32679.736 Hz
FIDRES 0.488653 Hz
AQ 1.0027661 sec
RG 6800
DW 15.300 usec
DE 6.00 usec
TE 673.2 K
DL 2.0000000 sec
d11 0.0300000 sec
DELTA 1.89999998 sec
TDO 10
----- CHANNEL f1 -----
NUC1 13C
P1 12.20 usec
PL1 3.00 dB
SFO1 125.7464750 MHz
----- CHANNEL f2 -----
CDEPRG2 valtz16
NUC2 1H
PCPD2 80.00 usec
PL2 2.00 dB
PL12 17.70 dB
PL13 17.70 dB
SFO2 500.0355000 MHz
SI 32768
SF 125.7326512 MHz
WDW EM
SSB 0
LB 6.00 Hz
GB 0
PC 1.00
  
```

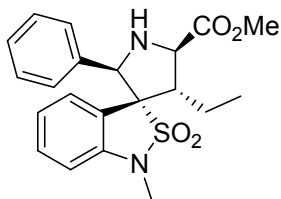

(2'R,3R,4'S,5'R)-4'-ethyl-1-methyl-2'-phenyl-5'-methoxycarbonyl-1H-spiro[benzo[c]isothiazole-3,3'-pyrrolidine]-2,2-dioxide (**3s**)

<sup>1</sup>H NMR (500 MHz, CDCl<sub>3</sub>): δ 7.18 (t, 1H, *J* = 7.8 Hz), 7.15-7.05 (m, 5H), 6.75 (t, 1H, *J* = 7.6 Hz), 6.52 (d, 1H, *J* = 7.9 Hz), 6.45 (d, 1H, *J* = 7.6 Hz), 5.16 (s, 1H), 4.12 (d, 1H, *J* = 9.0 Hz), 3.88 (s, 3H), 3.09-3.04 (m, 1H), 3.01 (br, 1H), 2.94 (s, 3H), 2.08-2.04 (m, 1H), 1.96-1.91 (m, 1H), 0.87 (t, 3H, *J* = 7.4 Hz).

<sup>13</sup>C NMR (125 MHz, CDCl<sub>3</sub>): δ 174.2, 140.7, 138.2, 129.2, 127.9, 127.6, 127.4, 125.5, 123.1, 121.5, 108.7, 77.2, 66.4, 63.3, 52.5, 49.4, 26.1, 21.0, 12.9.; HRMS (ESI-TOF<sup>+</sup>): *m/z* Calcd. for C<sub>21</sub>H<sub>25</sub>N<sub>2</sub>O<sub>4</sub>S [(M+H)<sup>+</sup>]: 401.1535. Found: 401.1546. Chiral HPLC (Daicel Chiralpak AD-H, 30% IPA/hexanes, 0.9 mL/min, λ = 254 nm) *t*<sub>R</sub>(major) = 9.688 min, *t*<sub>R</sub>(minor) = 12.850 min; [α]<sub>D</sub><sup>25</sup> = +8.1° (c = 0.44, CH<sub>2</sub>Cl<sub>2</sub>).

### <sup>1</sup>H NMR Spectrum of **3s**

LF-1-146 1H 2015 12 28

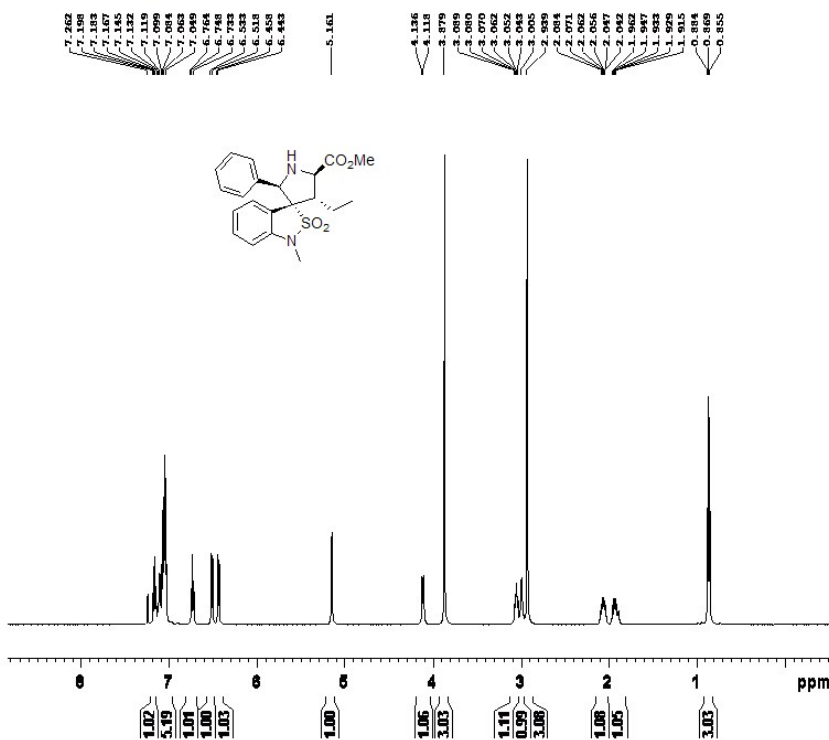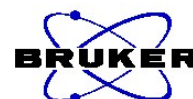

```

NAME          LF-1-146
EXPNO         1
PROCNO        1
Date_         20151228
Time          16.15
INSTRUM       spect
PROBHD        5 mm FAPBBO BB-
PULPROG       zg30
TD            32768
SOLVENT       CDCl3
NS            8
DS            1
SWH           10000.000 Hz
FIDRES        0.305176 Hz
AQ            1.6385000 sec
RG            181
DW            50.000 usec
DE            6.00 usec
TE            673.2 K
D1            1.00000000 sec
TDO           1

----- CHANNEL f1 -----
NUC1          1H
P1            13.00 usec
PL1           2.00 dB
SFO1          500.0335010 MHz
SI            16384
SF            500.0300093 MHz
WDW           EM
SSB           0
LB            0.20 Hz
GB            0
PC            4.00
  
```

### <sup>13</sup>C NMR Spectrum of **3s**

LF-1-146

13C 2015 12 30

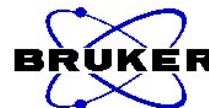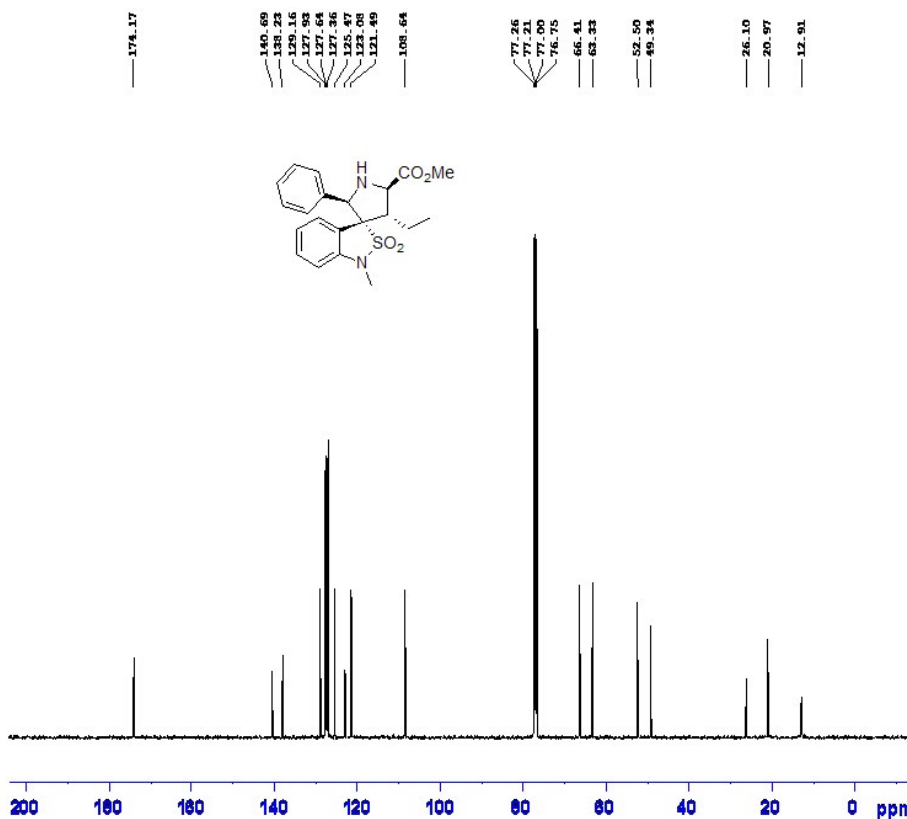

```

NAME LF-1-146
EXPNO 2
PROCNO 1
Date_ 20151230
Time 10.20
INSTRUM spect
PROBHD 5 mm PABBO BB-
PULPROG zgpg30
TD 65536
SOLVENT CDCl3
NS 1120
DS 2
SWH 32679.738 Hz
FIDRES 0.498653 Hz
AQ 1.0027661 sec
RG 6500
DM 15.300 usec
DE 6.00 usec
TE 673.2 K
D1 2.00000000 sec
d11 0.03000000 sec
DELTA 1.89999998 sec
TDC 10

----- CHANNEL f1 -----
NUC1 13C
P1 12.20 usec
PL1 3.00 dB
SFO1 125.7464750 MHz

----- CHANNEL f2 -----
CPDPRG2 waltz16
NUC2 1H
PCPD2 60.00 usec
PL2 2.00 dB
PL12 17.70 dB
PL13 17.70 dB
SFO2 500.0355000 MHz
SI 32768
SF 125.7326512 MHz
WDW EM
SSB 0
LB 3.00 Hz
GB 0
PC 1.00

```

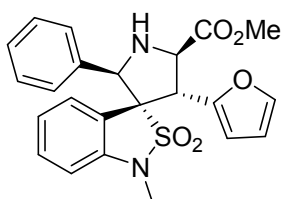

(2'*R*,3*R*,4'*S*,5'*R*)-4'-(furan-2-yl)-1-methyl-2'-phenyl-5'-methoxycarbonyl-1*H*-spiro[benzo[*c*]isothiazole-3,3'-pyrrolidine]-2,2-dioxide (**3t**)

<sup>1</sup>H NMR (500 MHz, CDCl<sub>3</sub>) δ 7.43 (d, 1H, *J* = 1.2 Hz), 7.19 (t, 1H, *J* = 7.9 Hz), 7.13-7.04 (m, 6H), 6.95 (t, 1H, *J* = 7.6 Hz), 6.36-6.35 (m, 2H), 6.26 (d, 1H, *J* = 3.2 Hz), 5.33 (s, 1H), 4.58 (d, 1H, *J* = 8.5 Hz), 4.41 (d, 1H, *J* = 8.5 Hz), 3.87 (s, 3H), 2.98 (br, 1H), 2.72 (s, 3H). <sup>13</sup>C NMR (125 MHz, CDCl<sub>3</sub>) δ 172.4, 149.2, 142.3, 140.5, 135.8, 129.4, 128.2, 128.0, 127.2, 125.4, 124.3, 121.6, 110.7, 109.0, 108.6, 75.1, 68.6, 63.1, 52.7, 47.2, 26.1.; HRMS (ESI-TOF<sup>+</sup>): *m/z* Calcd. for C<sub>23</sub>H<sub>23</sub>N<sub>2</sub>O<sub>5</sub>S [(*M*+*H*)<sup>+</sup>]: 439.1328. Found: 439.1323. Chiral HPLC (Daicel Chiralpak AD-H, 20% IPA/hexanes, 0.8 mL/min, λ = 254 nm) *t*<sub>R</sub>(major) = 29.453 min, *t*<sub>R</sub>(minor) = 41.371 min; [α]<sub>D</sub><sup>25</sup> = +76.3° (c = 0.38, CH<sub>2</sub>Cl<sub>2</sub>).

### <sup>1</sup>H NMR Spectrum of **3t**

LFF-1-154P 1H 2016 1102

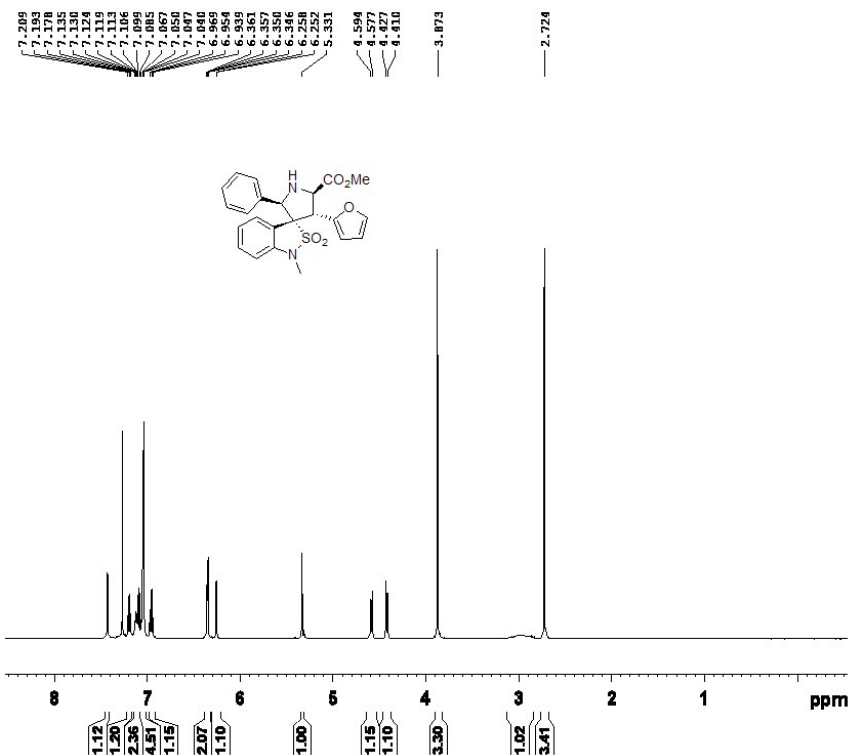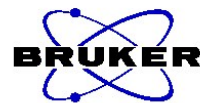

```

NAME      LFF-1-154P
EXPNO     1
PROCNO    1
Date_     20161102
Time      14.57
INSTRUM   spect
PROBHD    5 mm PABBO BB-
PULPROG   zg30
TD        32768
SOLVENT   CDC13
NS        16
DS        1
SVH       10000.000 Hz
FIDRES    0.305176 Hz
AQ        1.6385000 sec
RG        512
DW        50.000 usec
DE        6.00 usec
TE        673.2 K
D1        1.0000000 sec
TDO       1
  
```

```

----- CHANNEL f1 -----
NUC1      1H
P1        13.00 usec
PL1       2.00 dB
SFO1     500.0335010 MHz
SI        16384
SF        500.0300078 MHz
WDW       EM
SSB       0
LB        0.30 Hz
GB        0
PC        2.00
  
```

### <sup>13</sup>C NMR Spectrum of 3t

LFF-1-154P-1a <sup>13</sup>C 2016 11 04

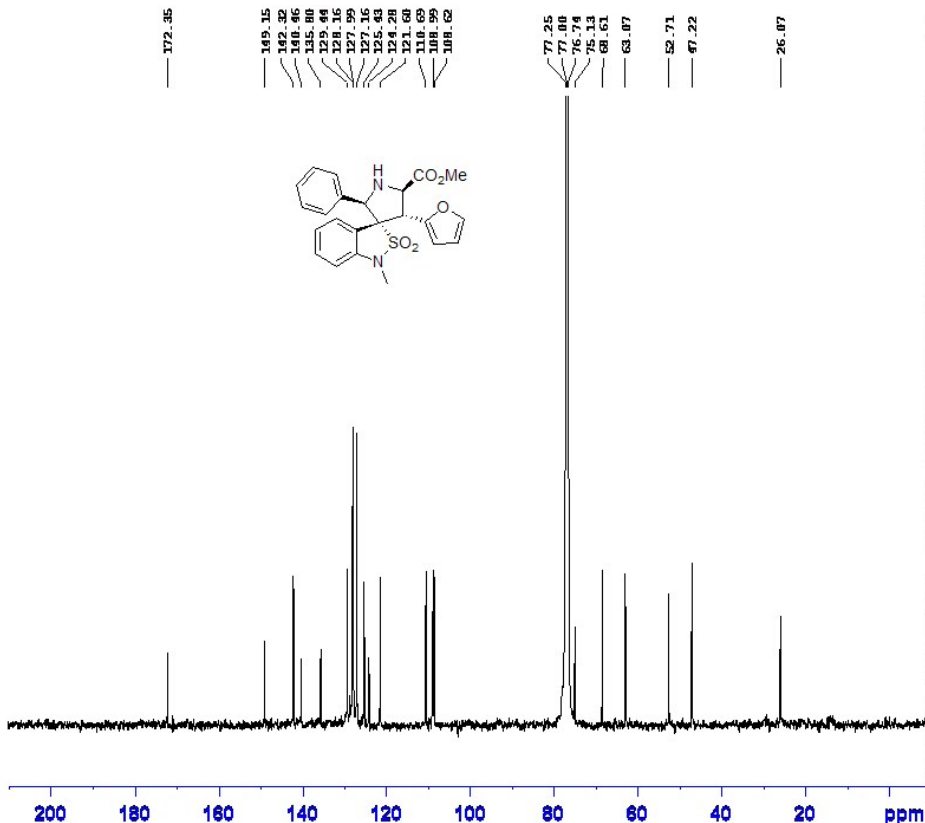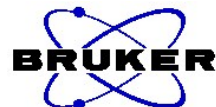

Current Data Parameters  
NAME LFF-1-154P-1a  
EXPNO 2  
PROCNO 1

```

F2 - Acquisition Parameters
Date_     20161104
Time      20.24
INSTRUM   spect
PROBHD    5 mm PABBO BB-
PULPROG   zgpg30
TD        65536
SOLVENT   CDC13
NS        20000
DS        2
SVH       32679.738 Hz
FIDRES    0.498653 Hz
AQ        1.0027661 sec
RG        1820
DW        15.000 usec
DE        6.00 usec
TE        673.2 K
D1        2.0000000 sec
d11       0.03000000 sec
DELTA     1.89999998 sec
TDO       20
  
```

```

----- CHANNEL f1 -----
NUC1      13C
P1        12.20 usec
PL1       3.00 dB
SFO1     125.7464750 MHz
  
```

```

----- CHANNEL f2 -----
CPDPRG2   waltz16
NUC2      1H
PCPD2     80.00 usec
PL2       2.00 dB
PL12     17.70 dB
PL13     17.70 dB
SFO2     500.0355000 MHz
  
```

```

F2 - Processing parameters
SI        32768
SF        125.7326432 MHz
WDW       EM
SSB       0
LB        6.00 Hz
GB        0
PC        3.00
  
```

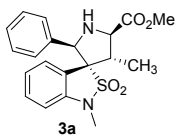

HPLC Conditions: Daicel Chiralpak AD-H, 30% IPA/hexanes, 1 mL/min

==== Shimadzu LCsolution 分析报告 ====

采集人 : Admin  
 样品名称 : 1s  
 样品 ID : 0  
 样品架 : 1  
 样品瓶# : 1  
 进样体积 : 5 uL  
 数据文件名 : 29.lcd  
 方法文件名 : LF.lcm  
 批处理文件名 :  
 报告文件名 : Default.lcr  
 数据采集 : 2016-5-6 16:13:00  
 数据处理 : 2016-5-6 16:30:16

<色谱图>

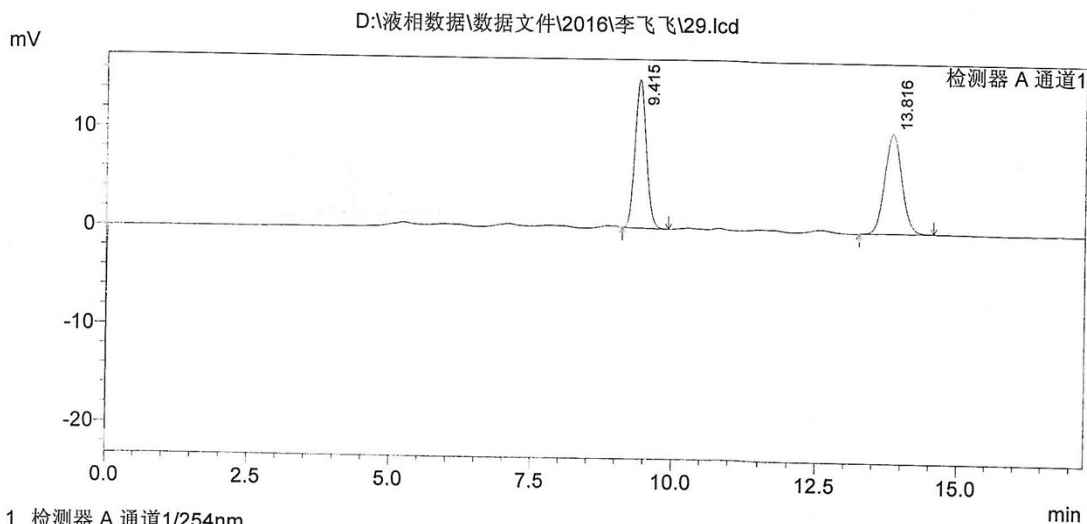

峰表

| 峰# | 保留时间   | 面积     | 高度    | 面积 %    | 高度 %    |
|----|--------|--------|-------|---------|---------|
| 1  | 9.415  | 206621 | 14983 | 49.149  | 59.735  |
| 2  | 13.816 | 213776 | 10100 | 50.851  | 40.265  |
| 总计 |        | 420397 | 25083 | 100.000 | 100.000 |

# ==== Shimadzu LCsolution 分析报告 ====

采集人 : Admin  
 样品名称 : 3  
 样品 ID : 0  
 样品架 : 1  
 样品瓶# : 1  
 进样体积 : 5 uL  
 数据文件名 : 32.lcd  
 方法文件名 : LF.lcm  
 批处理文件名 :  
 报告文件名 : Default.lcr  
 数据采集 : 2016-5-6 17:30:26  
 数据处理 : 2016-5-6 17:51:02

<色谱图>

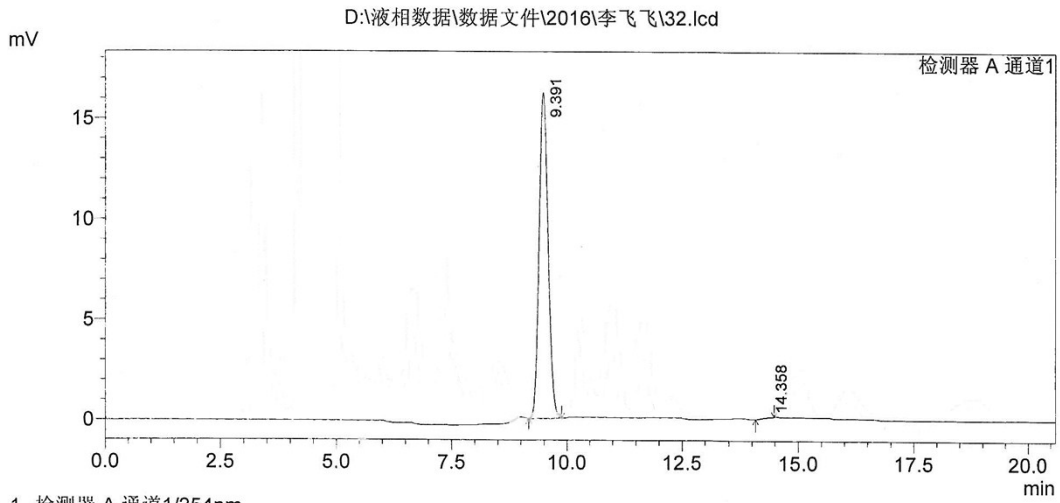

峰表

| 检测器 A Ch1 254nm |        |        |       |         |         |
|-----------------|--------|--------|-------|---------|---------|
| 峰#              | 保留时间   | 面积     | 高度    | 面积 %    | 高度 %    |
| 1               | 9.391  | 220458 | 16195 | 99.803  | 99.808  |
| 2               | 14.358 | 435    | 31    | 0.197   | 0.192   |
| 总计              |        | 220893 | 16226 | 100.000 | 100.000 |

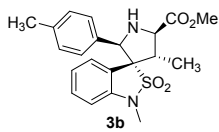

HPLC Conditions: Daicel Chiralpak AD-H, 30% IPA/hexanes, 1 mL/min

==== Shimadzu LCsolution 分析报告 ====

采集人 : Admin  
 样品名称 : 2ss  
 样品 ID : 0  
 样品架 : 1  
 样品瓶# : 1  
 进样体积 : 5 uL  
 数据文件名 : 16-6-23-1.lcd  
 方法文件名 : LF.lcm  
 批处理文件名 :  
 报告文件名 : Default.lcr  
 数据采集 : 2016-6-23 10:19:00  
 数据处理 : 2016-6-23 10:47:51

<色谱图>

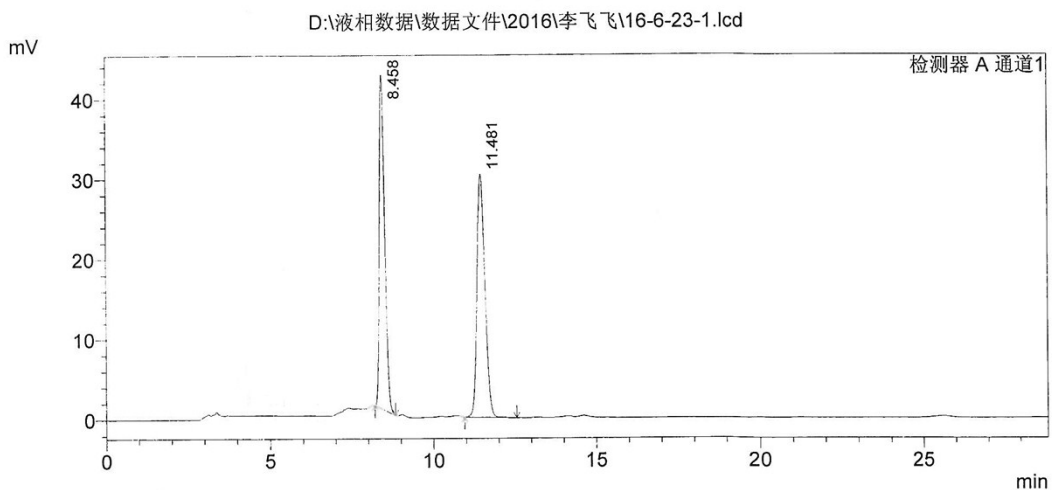

峰表

| 峰# | 保留时间   | 面积      | 高度    | 面积 %    | 高度 %    |
|----|--------|---------|-------|---------|---------|
| 1  | 8.458  | 493539  | 41751 | 49.051  | 57.923  |
| 2  | 11.481 | 512638  | 30330 | 50.949  | 42.077  |
| 总计 |        | 1006178 | 72081 | 100.000 | 100.000 |

==== Shimadzu LCsolution 分析报告 ====

采集人 : Admin  
 样品名称 : 2rs  
 样品 ID : 0  
 样品架 : 1  
 样品瓶# : 1  
 进样体积 : 5 uL  
 数据文件名 : 16-6-23-4.lcd  
 方法文件名 : LF.lcm  
 批处理文件名 :  
 报告文件名 : Default.lcr  
 数据采集 : 2016-6-23 13:00:53  
 数据处理 : 2016-6-23 13:26:30

<色谱图>

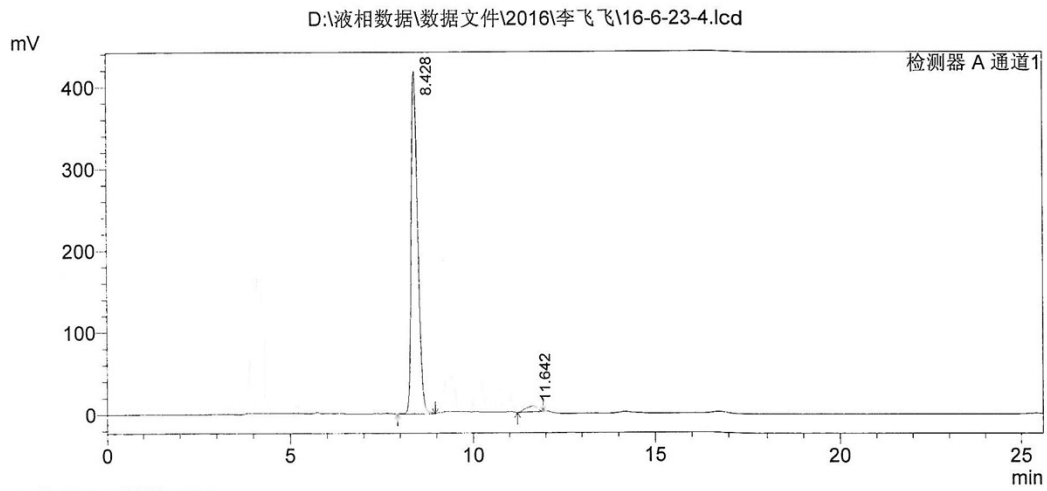

峰表

| 峰# | 保留时间   | 面积      | 高度     | 面积 %    | 高度 %    |
|----|--------|---------|--------|---------|---------|
| 1  | 8.428  | 5207748 | 417710 | 97.050  | 98.294  |
| 2  | 11.642 | 158296  | 7252   | 2.950   | 1.706   |
| 总计 |        | 5366044 | 424962 | 100.000 | 100.000 |



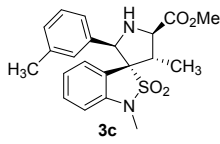

HPLC Conditions: Daicel Chiralpak AD-H, 10% IPA/hexanes, 1 mL/min

==== Shimadzu LCsolution 分析报告 ====

采集人 : Admin  
 样品名称 : 3ss-2  
 样品 ID : 0  
 样品架 : 1  
 样品瓶# : 1  
 进样体积 : 5 uL  
 数据文件名 : 16-6-23-11.lcd  
 方法文件名 : LF.lcm  
 批处理文件名 :  
 报告文件名 : Default.lcr  
 数据采集 : 2016-6-23 19:33:15  
 数据处理 : 2016-6-23 20:33:18

<色谱图>

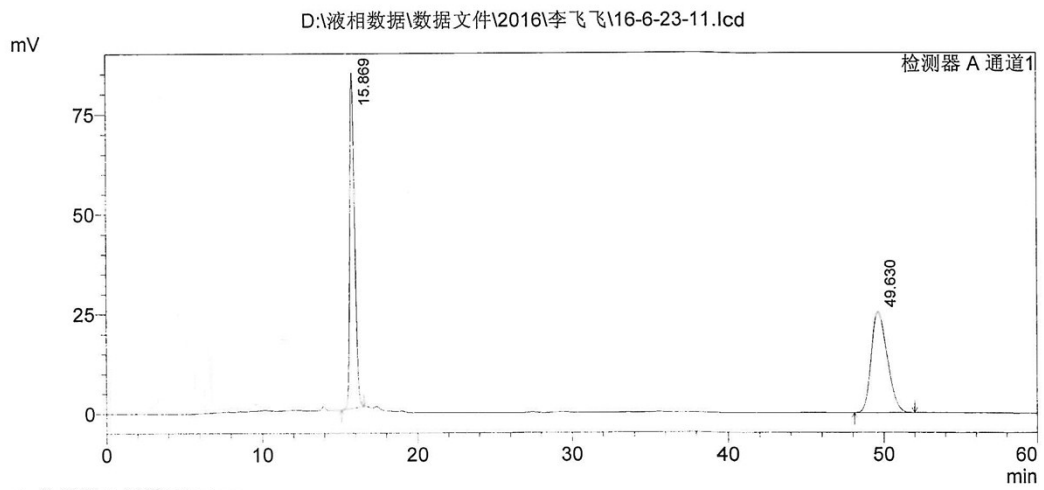

峰表

| 峰# | 保留时间   | 面积      | 高度     | 面积 %    | 高度 %    |
|----|--------|---------|--------|---------|---------|
| 1  | 15.869 | 1829114 | 83912  | 50.046  | 76.845  |
| 2  | 49.630 | 1825745 | 25285  | 49.954  | 23.155  |
| 总计 |        | 3654859 | 109198 | 100.000 | 100.000 |

# ==== Shimadzu LCsolution 分析报告 ====

```

采集人       : Admin
样品名称     : 3r
样品 ID     : 0
样品架      : 1
样品瓶#     : 1
进样体积    : 5 uL
数据文件名  : 16-6-23-10.lcd
方法文件名  : LF.lcm
批处理文件名 :
报告文件名  : Default.lcr
数据采集    : 2016-6-23 18:26:16
数据处理    : 2016-6-23 19:26:20
    
```

<色谱图>

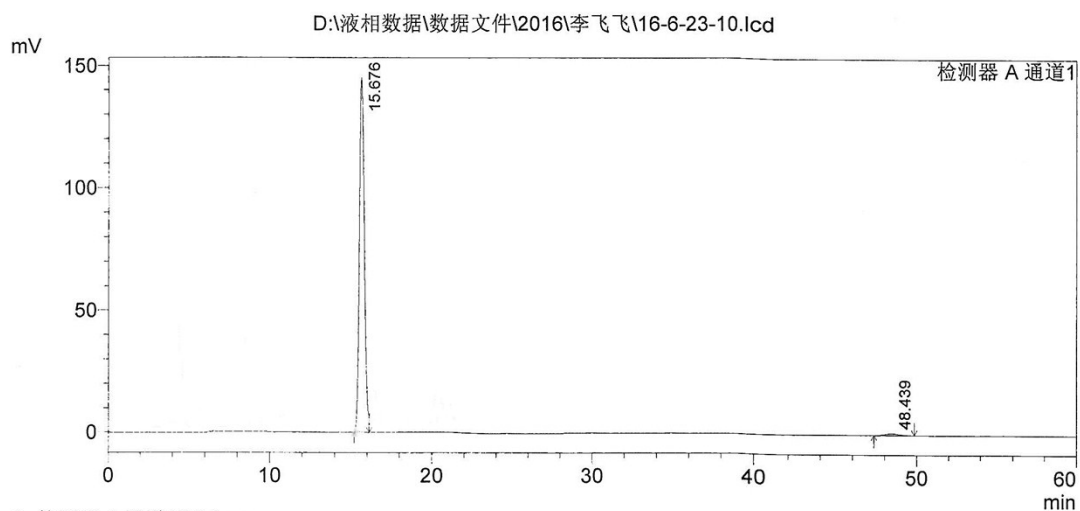

峰表

| 峰# | 保留时间   | 面积      | 高度     | 面积 %    | 高度 %    |
|----|--------|---------|--------|---------|---------|
| 1  | 15.676 | 3095243 | 144917 | 98.506  | 99.509  |
| 2  | 48.439 | 46947   | 715    | 1.494   | 0.491   |
| 总计 |        | 3142190 | 145632 | 100.000 | 100.000 |

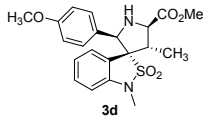

HPLC Conditions: Daicel Chiralpak AD-H, 20% IPA/hexanes, 0.8 mL/min

==== Shimadzu LCsolution 分析报告 ====

采集人 : Admin  
 样品名称 : 5ss  
 样品 ID : 0  
 样品架 : 1  
 样品瓶# : 1  
 进样体积 : 5 uL  
 数据文件名 : 16-07-01-1.lcd  
 方法文件名 : LF.lcm  
 批处理文件名 :  
 报告文件名 : Default.lcr  
 数据采集 : 2016-7-1 10:21:26  
 数据处理 : 2016-7-1 10:58:32

<色谱图>

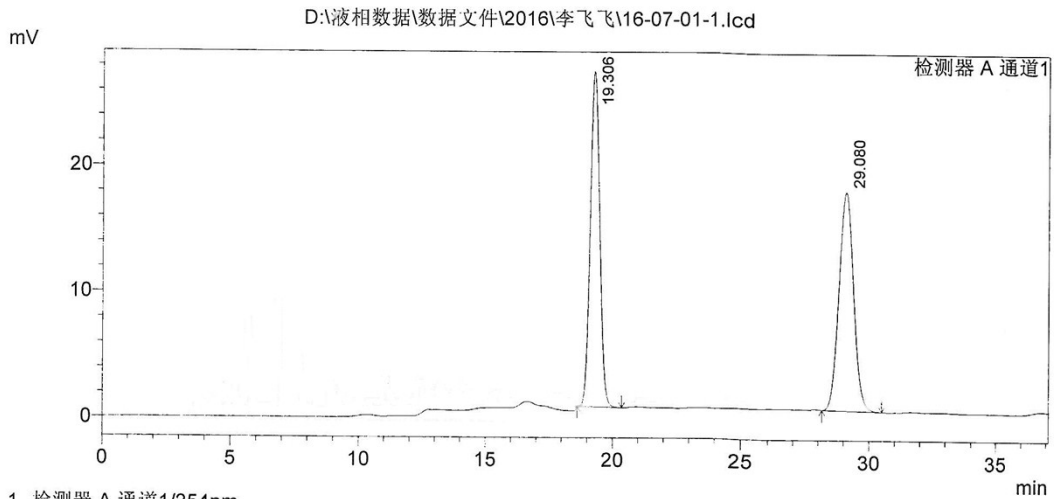

峰表

| 峰# | 保留时间   | 面积      | 高度    | 面积 %    | 高度 %    |
|----|--------|---------|-------|---------|---------|
| 1  | 19.306 | 686034  | 26624 | 49.518  | 60.552  |
| 2  | 29.080 | 699389  | 17345 | 50.482  | 39.448  |
| 总计 |        | 1385423 | 43969 | 100.000 | 100.000 |

# ==== Shimadzu LCsolution 分析报告 ====

采集人 : Admin  
 样品名称 : 5rs  
 样品 ID : 0  
 样品架 : 1  
 样品瓶# : 1  
 进样体积 : 5 uL  
 数据文件名 : 16-07-01-2.lcd  
 方法文件名 : LF.lcm  
 批处理文件名 :  
 报告文件名 : Default.lcr  
 数据采集 : 2016-7-1 11:02:21  
 数据处理 : 2016-7-1 11:37:32

## <色谱图>

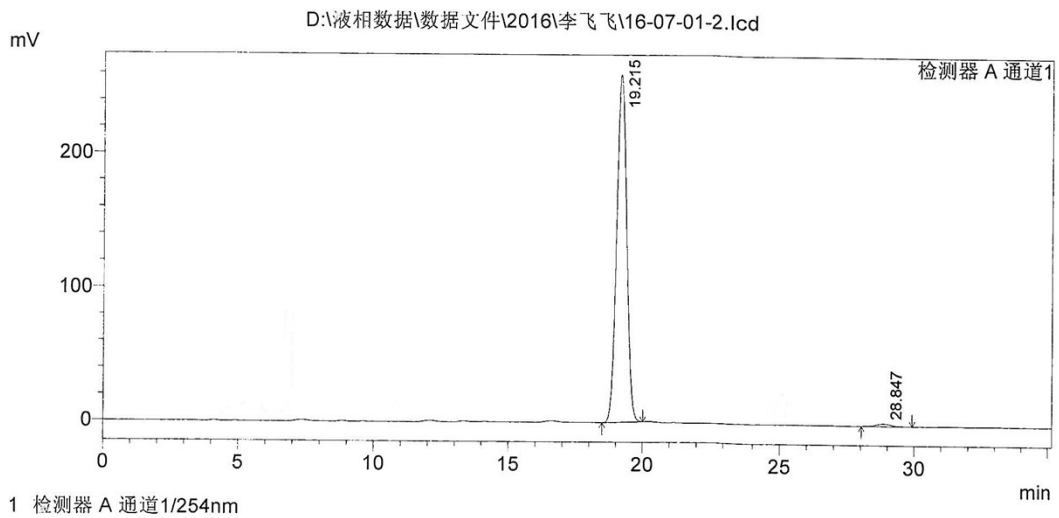

峰表

| 峰# | 保留时间   | 面积      | 高度     | 面积 %    | 高度 %    |
|----|--------|---------|--------|---------|---------|
| 1  | 19.215 | 6767006 | 259701 | 98.930  | 99.278  |
| 2  | 28.847 | 73206   | 1889   | 1.070   | 0.722   |
| 总计 |        | 6840212 | 261589 | 100.000 | 100.000 |

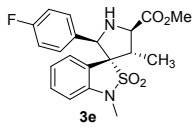

HPLC Conditions: Daicel Chiralpak AD-H, 30% IPA/hexanes, 1 mL/min

==== Shimadzu LCsolution 分析报告 ====

采集人 : Admin  
 样品名称 : 4ss  
 样品 ID : 0  
 样品架 : 1  
 样品瓶# : 1  
 进样体积 : 5 uL  
 数据文件名 : 16-6-24-1.lcd  
 方法文件名 : LF.lcm  
 批处理文件名 :  
 报告文件名 : Default.lcr  
 数据采集 : 2016-6-24 10:39:02  
 数据处理 : 2016-6-24 11:01:00

<色谱图>

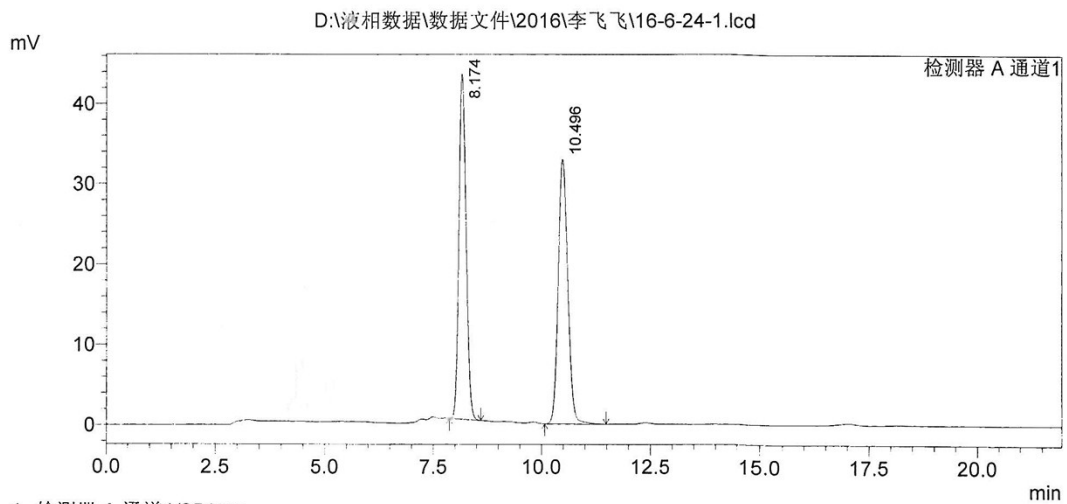

1 检测器 A 通道1/254nm

峰表

| 峰# | 保留时间   | 面积      | 高度    | 面积 %    | 高度 %    |
|----|--------|---------|-------|---------|---------|
| 1  | 8.174  | 499655  | 43036 | 49.585  | 56.643  |
| 2  | 10.496 | 508014  | 32942 | 50.415  | 43.357  |
| 总计 |        | 1007669 | 75978 | 100.000 | 100.000 |

==== Shimadzu LCsolution 分析报告 ====

采集人 : Admin  
 样品名称 : 4rs  
 样品 ID : 0  
 样品架 : 1  
 样品瓶# : 1  
 进样体积 : 5 uL  
 数据文件名 : 16-6-24-4.lcd  
 方法文件名 : LF.lcm  
 批处理文件名 :  
 报告文件名 : Default.lcr  
 数据采集 : 2016-6-24 13:25:48  
 数据处理 : 2016-6-24 13:45:28

<色谱图>

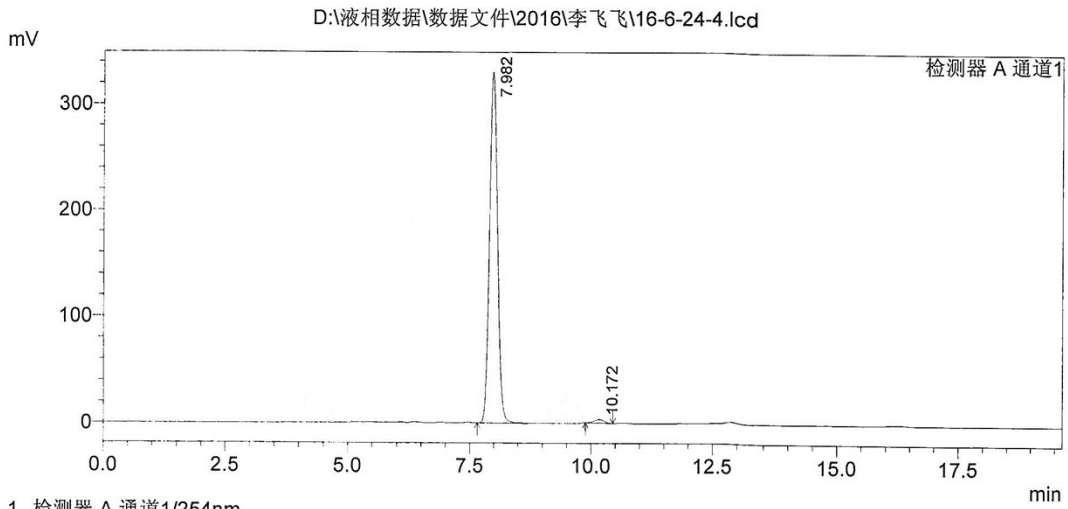

峰表

| 峰# | 保留时间   | 面积      | 高度     | 面积 %    | 高度 %    |
|----|--------|---------|--------|---------|---------|
| 1  | 7.982  | 3812142 | 330367 | 98.762  | 99.007  |
| 2  | 10.172 | 47805   | 3314   | 1.238   | 0.993   |
| 总计 |        | 3859947 | 333681 | 100.000 | 100.000 |

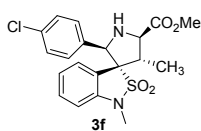

HPLC Conditions: Daicel Chiralpak AD-H, 30% IPA/hexanes, 1 mL/min

==== Shimadzu LCsolution 分析报告 ====

采集人 : Admin  
 样品名称 : 6ss  
 样品 ID : 0  
 样品架 : 1  
 样品瓶# : 1  
 进样体积 : 5 uL  
 数据文件名 : 16-6-24-8.lcd  
 方法文件名 : LF.lcm  
 批处理文件名 :  
 报告文件名 : Default.lcr  
 数据采集 : 2016-6-24 15:20:27  
 数据处理 : 2016-6-24 15:43:29

<色谱图>

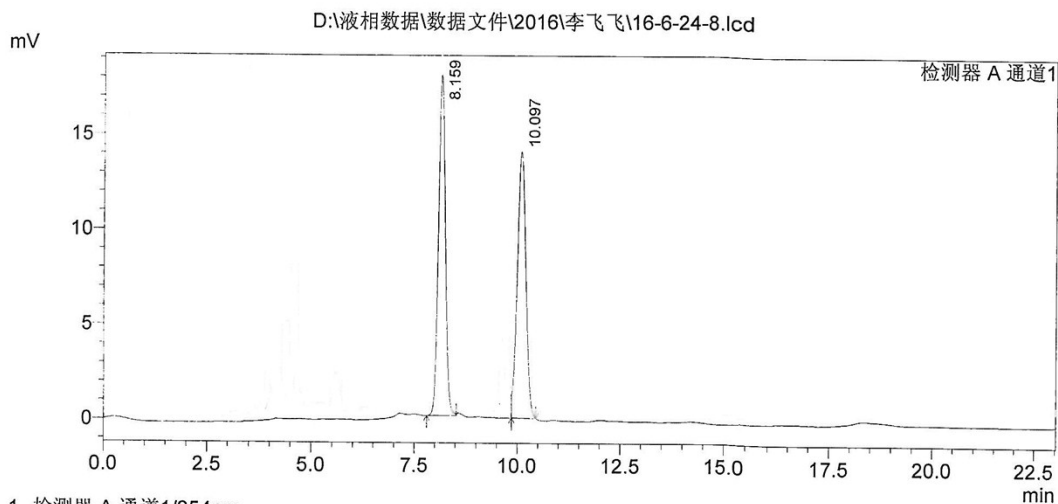

1 检测器 A 通道1/254nm

峰表

| 峰# | 保留时间   | 面积     | 高度    | 面积 %    | 高度 %    |
|----|--------|--------|-------|---------|---------|
| 1  | 8.159  | 209161 | 17906 | 50.679  | 56.087  |
| 2  | 10.097 | 203555 | 14020 | 49.321  | 43.913  |
| 总计 |        | 412716 | 31926 | 100.000 | 100.000 |

# ==== Shimadzu LCsolution 分析报告 ====

采集人 : Admin  
 样品名称 : 6rs  
 样品 ID : 0  
 样品架 : 1  
 样品瓶# : 1  
 进样体积 : 5 uL  
 数据文件名 : 16-6-24-7.lcd  
 方法文件名 : LF.lcm  
 批处理文件名 :  
 报告文件名 : Default.lcr  
 数据采集 : 2016-6-24 14:53:23  
 数据处理 : 2016-6-24 15:17:57

## <色谱图>

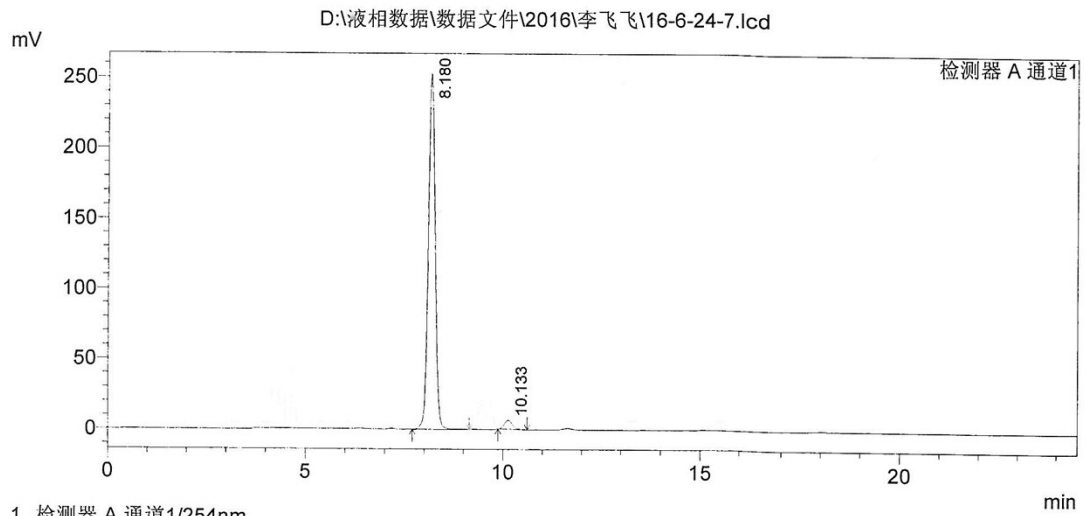

峰表

| 检测器 A Ch1 254nm |        |         |        |         |         |
|-----------------|--------|---------|--------|---------|---------|
| 峰#              | 保留时间   | 面积      | 高度     | 面积 %    | 高度 %    |
| 1               | 8.180  | 3032984 | 252907 | 97.134  | 97.548  |
| 2               | 10.133 | 89486   | 6358   | 2.866   | 2.452   |
| 总计              |        | 3122470 | 259265 | 100.000 | 100.000 |



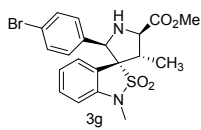

HPLC Conditions: Daicel Chiralpak AD-H, 30% IPA/hexanes, 1 mL/min

==== Shimadzu LCsolution 分析报告 ====

采集人 : Admin  
 样品名称 : 10-ss  
 样品 ID : 0  
 样品架 : 1  
 样品瓶# : 1  
 进样体积 : 5 uL  
 数据文件名 : 16-6-18-2.lcd  
 方法文件名 : LF.lcm  
 批处理文件名 :  
 报告文件名 : Default.lcr  
 数据采集 : 2016-6-18 10:15:48  
 数据处理 : 2016-6-18 10:34:41

<色谱图>

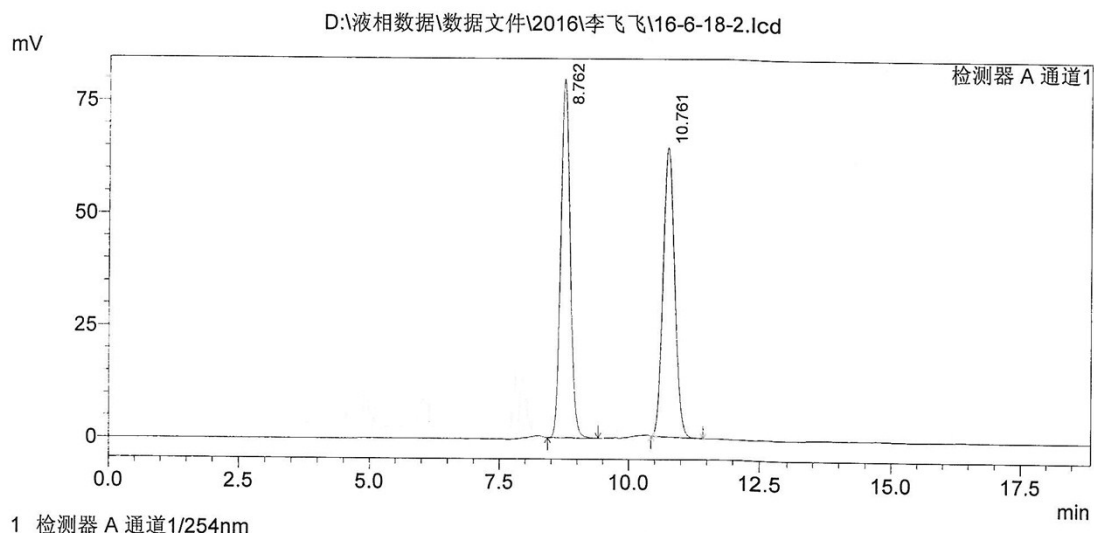

峰表

| 峰# | 保留时间   | 面积      | 高度     | 面积 %    | 高度 %    |
|----|--------|---------|--------|---------|---------|
| 1  | 8.762  | 1006553 | 79757  | 50.158  | 55.339  |
| 2  | 10.761 | 1000227 | 64366  | 49.842  | 44.661  |
| 总计 |        | 2006781 | 144123 | 100.000 | 100.000 |

==== Shimadzu LCsolution 分析报告 ====

采集人 : Admin  
 样品名称 : 10-s  
 样品 ID : 0  
 样品架 : 1  
 样品瓶# : 1  
 进样体积 : 5 uL  
 数据文件名 : 16-6-18-4.lcd  
 方法文件名 : LF.lcm  
 批处理文件名 :  
 报告文件名 : Default.lcr  
 数据采集 : 2016-6-18 11:23:28  
 数据处理 : 2016-6-18 11:43:17

<色谱图>

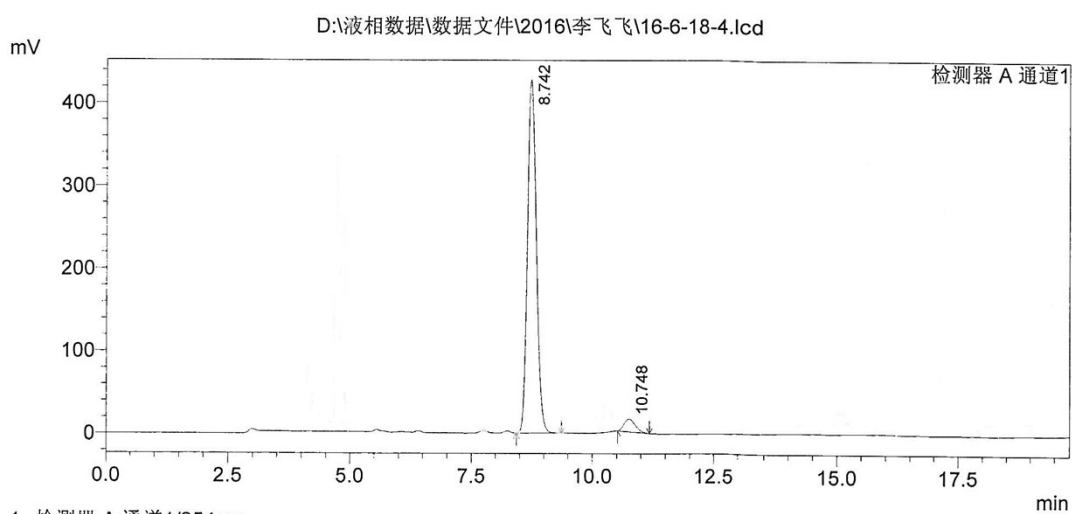

峰表

| 峰# | 保留时间   | 面积      | 高度     | 面积 %    | 高度 %    |
|----|--------|---------|--------|---------|---------|
| 1  | 8.742  | 5519377 | 427202 | 95.696  | 96.490  |
| 2  | 10.748 | 248256  | 15539  | 4.304   | 3.510   |
| 总计 |        | 5767633 | 442741 | 100.000 | 100.000 |

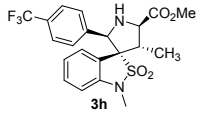

HPLC Conditions: Daicel Chiralpak AD-H, 20% IPA/hexanes, 0.5 mL/min

2017-1-10 11:38:36 1 / 1

==== Shimadzu LCsolution 分析报告 ====

采集人 : Admin  
 样品名称 : LFF-3-92  
 样品 ID :  
 样品架 : 1  
 样品瓶# : 1  
 进样体积 : 5 uL  
 数据文件名 : LFF-1-10-3.lcd  
 方法文件名 : LF-3.lcm  
 批处理文件名 :  
 报告文件名 : Default.lcr  
 数据采集 : 2017-1-10 11:06:07  
 数据处理 : 2017-1-10 11:36:26

<色谱图>

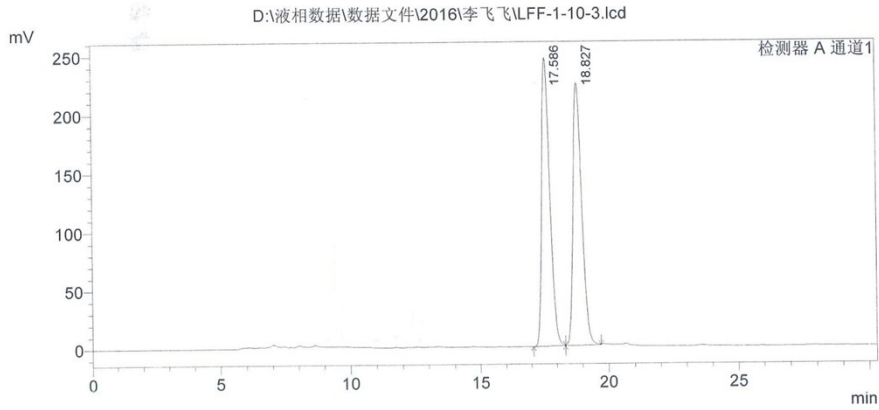

1 检测器 A 通道1/254nm

峰表

| 峰# | 保留时间   | 面积       | 高度     | 面积 %    | 高度 %    |
|----|--------|----------|--------|---------|---------|
| 1  | 17.586 | 5522605  | 246211 | 51.129  | 52.344  |
| 2  | 18.827 | 5278713  | 224159 | 48.871  | 47.656  |
| 总计 |        | 10801317 | 470370 | 100.000 | 100.000 |

D:\液相数据\数据文件\2016\李飞飞\LFF-1-10-3.lcd

## ==== Shimadzu LCsolution 分析报告 ====

采集人 : Admin  
 样品名称 : LFF-3-92-1  
 样品ID :  
 样品架 : 1  
 样品瓶# : 1  
 进样体积 : 5 uL  
 数据文件名 : LFF-1-10-4.lcd  
 方法文件名 : LF-3.lcm  
 批处理文件名 :  
 报告文件名 : Default.lcr  
 数据采集 : 2017-1-10 11:40:09  
 数据处理 : 2017-1-10 12:10:45

&lt;色谱图&gt;

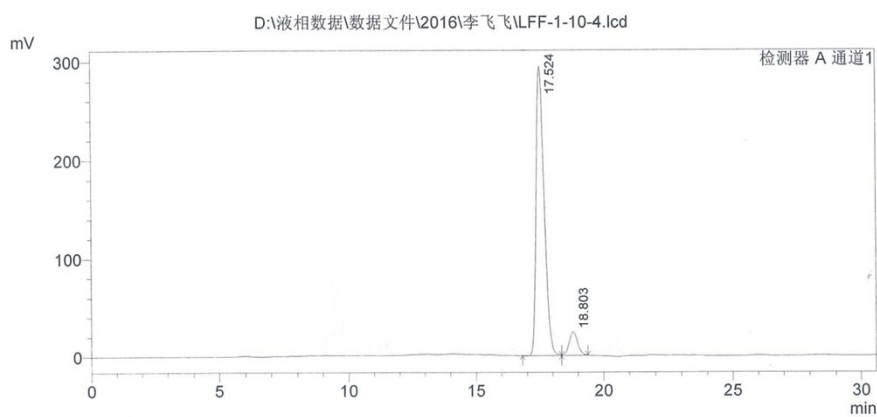

峰表

| 峰# | 保留时间   | 面积      | 高度     | 面积 %    | 高度 %    |
|----|--------|---------|--------|---------|---------|
| 1  | 17.524 | 6510433 | 293957 | 92.256  | 92.495  |
| 2  | 18.803 | 546456  | 23852  | 7.744   | 7.505   |
| 总计 |        | 7056889 | 317809 | 100.000 | 100.000 |

D:\液相数据\数据文件\2016\李飞飞\LFF-1-10-4.lcd

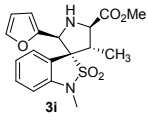

HPLC Conditions: Daicel Chiralpak AD-H, 20% IPA/hexanes, 0.8 mL/min

==== Shimadzu LCsolution 分析报告 ====

采集人 : Admin  
 样品名称 : 7ss  
 样品 ID : 0  
 样品架 : 1  
 样品瓶# : 1  
 进样体积 : 5 uL  
 数据文件名 : 16-07-01-7.lcd  
 方法文件名 : LF.lcm  
 批处理文件名 :  
 报告文件名 : Default.lcr  
 数据采集 : 2016-7-1 15:51:50  
 数据处理 : 2016-7-1 16:34:45

<色谱图>

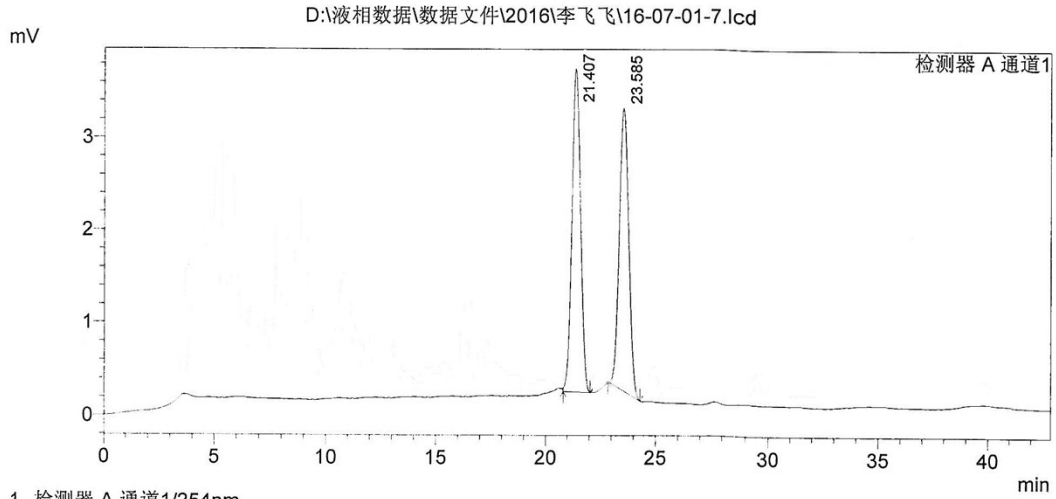

1 检测器 A 通道1/254nm

峰表

| 峰# | 保留时间   | 面积     | 高度   | 面积 %    | 高度 %    |
|----|--------|--------|------|---------|---------|
| 1  | 21.407 | 96142  | 3490 | 51.416  | 53.325  |
| 2  | 23.585 | 90847  | 3055 | 48.584  | 46.675  |
| 总计 |        | 186989 | 6545 | 100.000 | 100.000 |

# ==== Shimadzu LCsolution 分析报告 ====

采集人 : Admin  
 样品名称 : 7rs  
 样品 ID : 0  
 样品架 : 1  
 样品瓶# : 1  
 进样体积 : 5 uL  
 数据文件名 : 16-07-01-6.lcd  
 方法文件名 : LF.lcm  
 批处理文件名 :  
 报告文件名 : Default.lcr  
 数据采集 : 2016-7-1 15:04:13  
 数据处理 : 2016-7-1 15:42:30

## <色谱图>

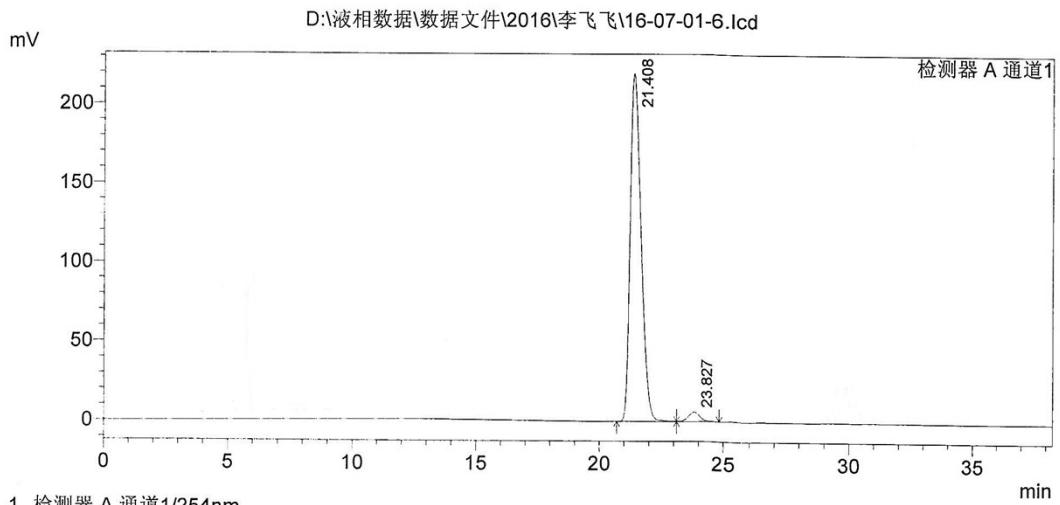

峰表

| 峰# | 保留时间   | 面积      | 高度     | 面积 %    | 高度 %    |
|----|--------|---------|--------|---------|---------|
| 1  | 21.408 | 6662362 | 219471 | 97.239  | 97.397  |
| 2  | 23.827 | 189192  | 5864   | 2.761   | 2.603   |
| 总计 |        | 6851554 | 225336 | 100.000 | 100.000 |

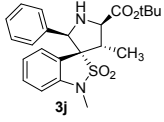

HPLC Conditions: Daicel Chiralpak AD-H, 5% IPA/hexanes, 0.25 mL/min

2017-1-11 21:01:18 1 / 1

==== Shimadzu LCsolution 分析报告 ====

采集人 : Admin  
 样品名称 : LFF-3-80  
 样品 ID :  
 样品架 : 1  
 样品瓶# : 1  
 进样体积 : 5 uL  
 数据文件名 : LFF-1-11-4.lcd  
 方法文件名 : LF-3.lcm  
 批处理文件名 :  
 报告文件名 : Default.lcr  
 数据采集 : 2017-1-11 19:31:51  
 数据处理 : 2017-1-11 20:59:22

<色谱图>

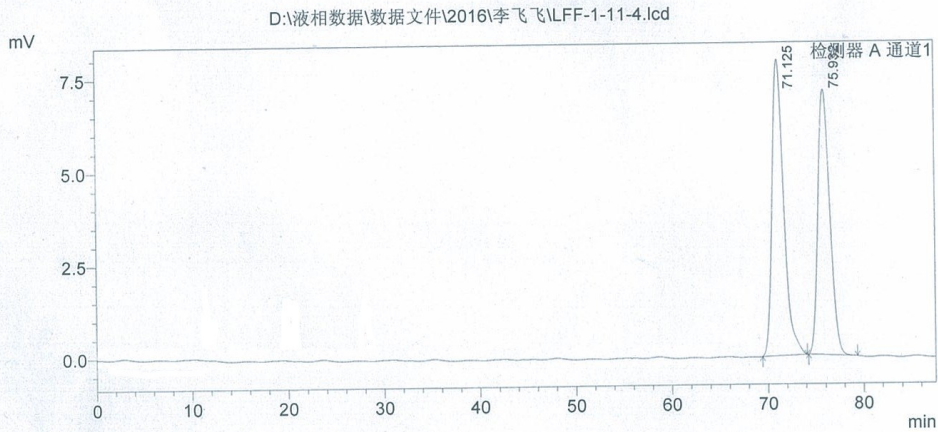

1 检测器 A 通道1/254nm

峰表

| 峰# | 保留时间   | 面积      | 高度    | 面积 %    | 高度 %    |
|----|--------|---------|-------|---------|---------|
| 1  | 71.125 | 673518  | 7971  | 52.183  | 52.781  |
| 2  | 75.932 | 617173  | 7131  | 47.817  | 47.219  |
| 总计 |        | 1290691 | 15103 | 100.000 | 100.000 |

D:\液相数据\数据文件\2016\李飞飞\LFF-1-11-4.lcd

### ==== Shimadzu LCsolution 分析报告 ====

采集人 : Admin  
 样品名称 : LFF-3-80-1  
 样品 ID :  
 样品架 : 1  
 样品瓶# : 1  
 进样体积 : 5 uL  
 数据文件名 : LFF-1-11-5.lcd  
 方法文件名 : LF-3.lcm  
 批处理文件名 :  
 报告文件名 : Default.lcr  
 数据采集 : 2017-1-11 21:06:52  
 数据处理 : 2017-1-11 22:32:06

#### <色谱图>

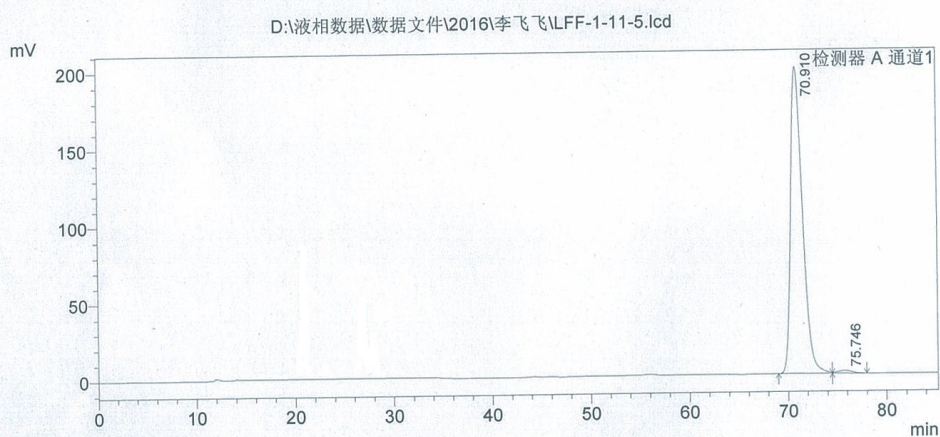

峰表

| 峰# | 保留时间   | 面积       | 高度     | 面积 %    | 高度 %    |
|----|--------|----------|--------|---------|---------|
| 1  | 70.910 | 16745807 | 198781 | 98.916  | 99.099  |
| 2  | 75.746 | 183450   | 1807   | 1.084   | 0.901   |
| 总计 |        | 16929256 | 200588 | 100.000 | 100.000 |



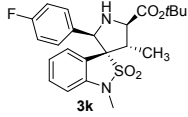

HPLC Conditions: Daicel Chiralpak AD-H, 70% IPA/hexanes, 0.18 mL/min

2017-1-9 11:16:21 1 / 1

==== Shimadzu LCsolution 分析报告 ====

采集人 : Admin  
 样品名称 : LFF-3-94  
 样品 ID :  
 样品架 : 1  
 样品瓶# : 1  
 进样体积 : 5 uL  
 数据文件名 : 2016-1-9-1.lcd  
 方法文件名 : LF-3.lcm  
 批处理文件名 :  
 报告文件名 : Default.lcr  
 数据采集 : 2017-1-9 10:01:11  
 数据处理 : 2017-1-9 10:42:01

<色谱图>

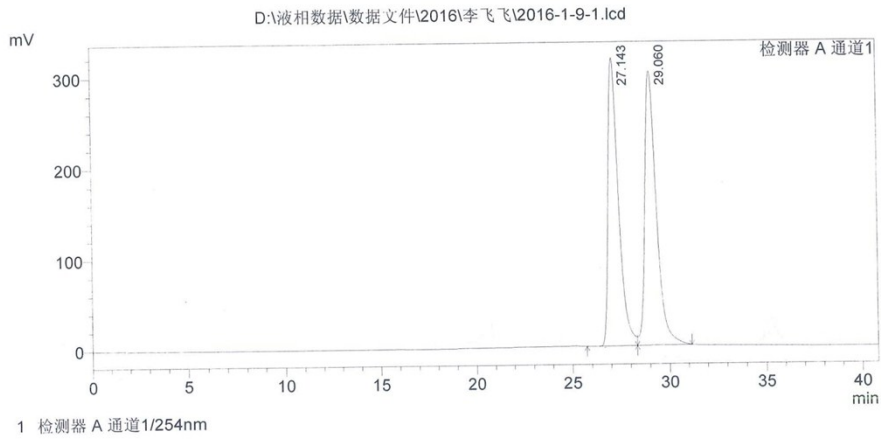

峰表

| 峰# | 保留时间   | 面积       | 高度     | 面积 %    | 高度 %    |
|----|--------|----------|--------|---------|---------|
| 1  | 27.143 | 11901654 | 316918 | 48.923  | 51.215  |
| 2  | 29.060 | 12425475 | 301877 | 51.077  | 48.785  |
| 总计 |        | 24327129 | 618795 | 100.000 | 100.000 |

D:\液相数据\数据文件\2016\李飞飞\2016-1-9-1.lcd

==== Shimadzu LCsolution 分析报告 ====

采集人 : Admin  
 样品名称 : LFF-3-94-1  
 样品 ID :  
 样品架 : 1  
 样品瓶# : 1  
 进样体积 : 5 uL  
 数据文件名 : 2016-1-9-2.lcd  
 方法文件名 : LF-3.lcm  
 批处理文件名 :  
 报告文件名 : Default.lcr  
 数据采集 : 2017-1-9 10:44:32  
 数据处理 : 2017-1-9 11:26:05

<色谱图>

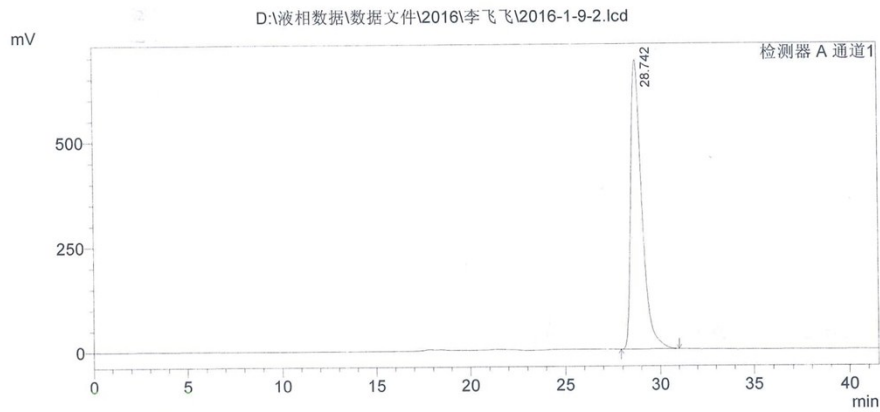

1 检测器 A 通道1/254nm

峰表

| 峰# | 保留时间   | 面积       | 高度     | 面积 %    | 高度 %    |
|----|--------|----------|--------|---------|---------|
| 1  | 28.742 | 28099242 | 688896 | 100.000 | 100.000 |
| 总计 |        | 28099242 | 688896 | 100.000 | 100.000 |

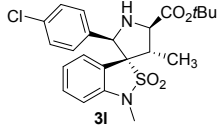

HPLC Conditions: Daicel Chiralpak AD-H, 70% IPA/hexanes, 0.2 mL/min

2017-1-4 17:52:01 1 / 1

==== Shimadzu LCsolution 分析报告 ====

采集人 : Admin  
 样品名称 : 4消旋  
 样品 ID :  
 样品架 : 1  
 样品瓶# : 1  
 进样体积 : 5 uL  
 数据文件名 : 2017-1-4-1.lcd  
 方法文件名 : LF-3.lcm  
 批处理文件名 :  
 报告文件名 : Default.lcr  
 数据采集 : 2017-1-4 13:26:37  
 数据处理 : 2017-1-4 14:10:03

<色谱图>

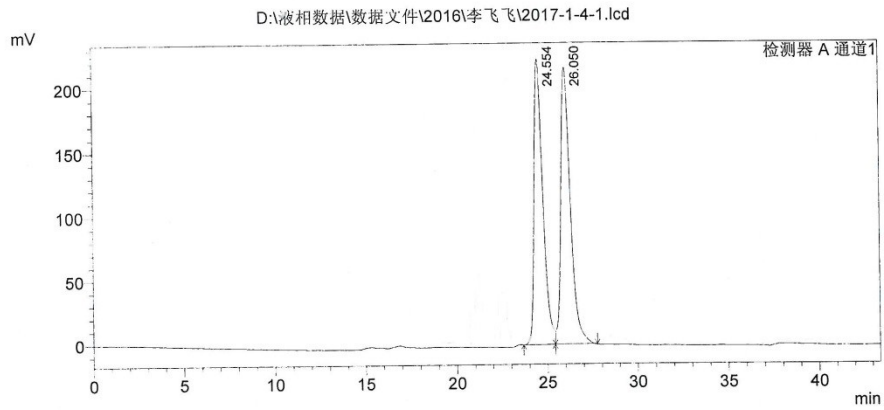

1 检测器 A 通道1/254nm

峰表

| 峰# | 保留时间   | 面积       | 高度     | 面积 %    | 高度 %    |
|----|--------|----------|--------|---------|---------|
| 1  | 24.554 | 7533427  | 223213 | 48.791  | 50.795  |
| 2  | 26.050 | 7906627  | 216225 | 51.209  | 49.205  |
| 总计 |        | 15440053 | 439438 | 100.000 | 100.000 |

D:\液相数据\数据文件\2016\李飞飞\2017-1-4-1.lcd

==== Shimadzu LCsolution 分析报告 ====

采集人 : Admin  
 样品名称 : 4手性  
 样品 ID :  
 样品架 : 1  
 样品瓶# : 1  
 进样体积 : 5 uL  
 数据文件名 : 2017-1-4-2.lcd  
 方法文件名 : LF-3.lcm  
 批处理文件名 :  
 报告文件名 : Default.lcr  
 数据采集 : 2017-1-4 14:13:53  
 数据处理 : 2017-1-4 14:59:54

<色谱图>

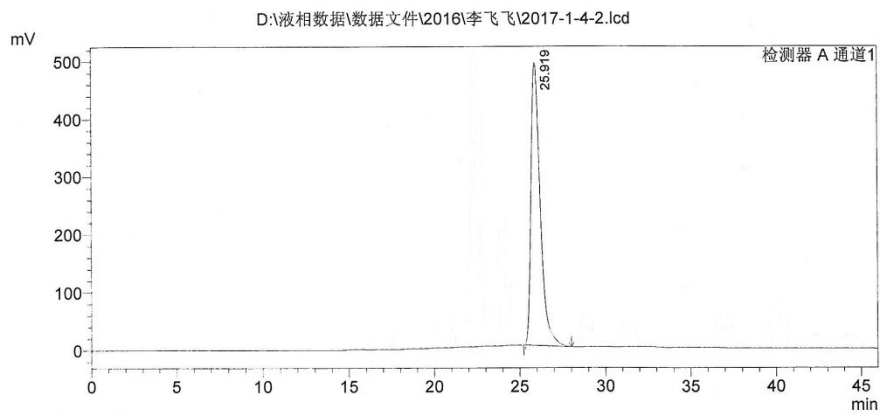

峰表

| 检测器 A Ch1 254nm |        |          |        |         |         |
|-----------------|--------|----------|--------|---------|---------|
| 峰#              | 保留时间   | 面积       | 高度     | 面积 %    | 高度 %    |
| 1               | 25.919 | 18415942 | 489709 | 100.000 | 100.000 |
| 总计              |        | 18415942 | 489709 | 100.000 | 100.000 |

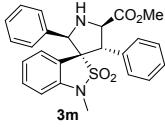

HPLC Conditions: Daicel Chiralpak AD-H, 20% IPA/hexanes, 0.8 mL/min

==== Shimadzu LCsolution 分析报告 ====

采集人 : Admin  
 样品名称 : 双1  
 样品 ID : 0  
 样品架 : 1  
 样品瓶# : 1  
 进样体积 : 5 uL  
 数据文件名 : 16-7-28-7.lcd  
 方法文件名 : LF反应体系.lcm  
 批处理文件名 :  
 报告文件名 : Default.lcr  
 数据采集 : 2016-7-28 15:53:58  
 数据处理 : 2016-7-28 16:46:04

<色谱图>

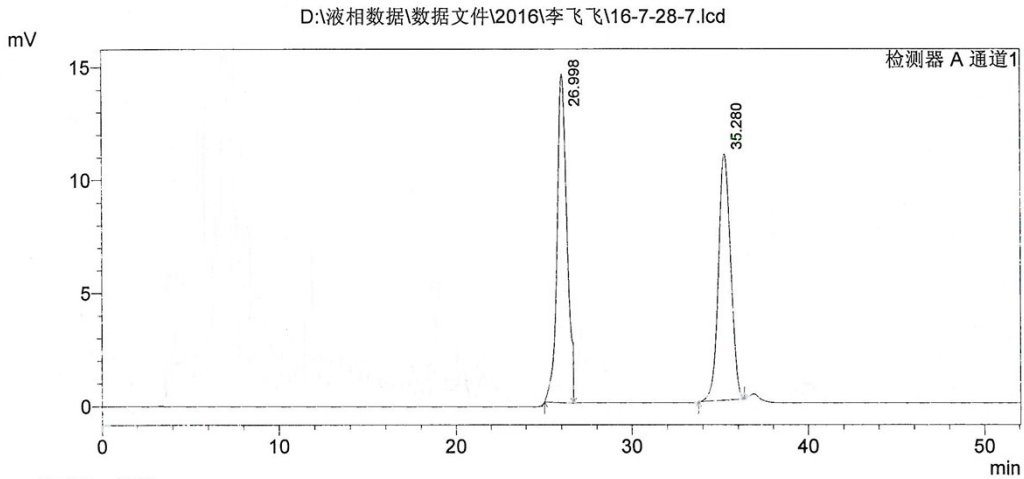

1 检测器 A 通道1/254nm

峰表

| 峰# | 保留时间   | 面积      | 高度    | 面积 %    | 高度 %    |
|----|--------|---------|-------|---------|---------|
| 1  | 26.998 | 564630  | 14548 | 51.802  | 57.223  |
| 2  | 35.280 | 525354  | 10875 | 48.198  | 42.777  |
| 总计 |        | 1089984 | 25424 | 100.000 | 100.000 |

# ==== Shimadzu LCsolution 分析报告 ====

采集人 : Admin  
 样品名称 : 手性双1  
 样品 ID : 0  
 样品架 : 1  
 样品瓶# : 1  
 进样体积 : 5 uL  
 数据文件名 : 16-7-28-8.lcd  
 方法文件名 : LF反应体系.lcm  
 批处理文件名 :  
 报告文件名 : Default.lcr  
 数据采集 : 2016-7-28 16:50:08  
 数据处理 : 2016-7-28 17:40:33

<色谱图>

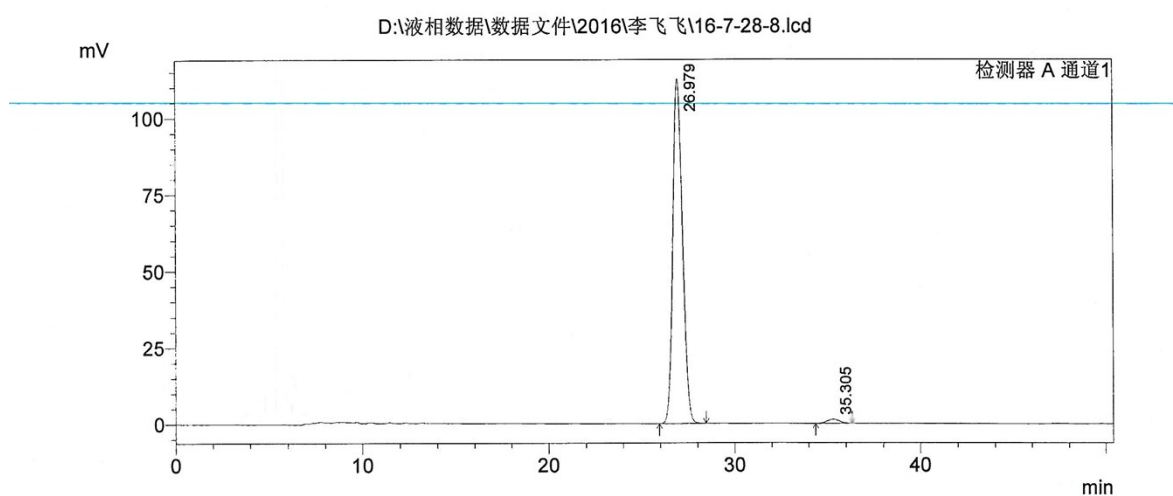

峰表

| 峰# | 保留时间   | 面积      | 高度     | 面积 %    | 高度 %    |
|----|--------|---------|--------|---------|---------|
| 1  | 26.979 | 4071802 | 112656 | 98.529  | 98.854  |
| 2  | 35.305 | 60811   | 1307   | 1.471   | 1.146   |
| 总计 |        | 4132613 | 113962 | 100.000 | 100.000 |

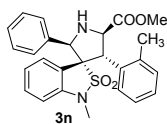

HPLC Conditions: Daicel Chiralpak AD-H, 30% IPA/hexanes, 0.9 mL/min

==== Shimadzu LCsolution 分析报告 ====

采集人 : Admin  
 样品名称 : 双4  
 样品 ID : 0  
 样品架 : 1  
 样品瓶# : 1  
 进样体积 : 5 uL  
 数据文件名 : 16-7-27-1.lcd  
 方法文件名 : LF反应体系.lcm  
 批处理文件名 :  
 报告文件名 : Default.lcr  
 数据采集 : 2016-7-27 9:49:58  
 数据处理 : 2016-7-27 10:21:59

<色谱图>

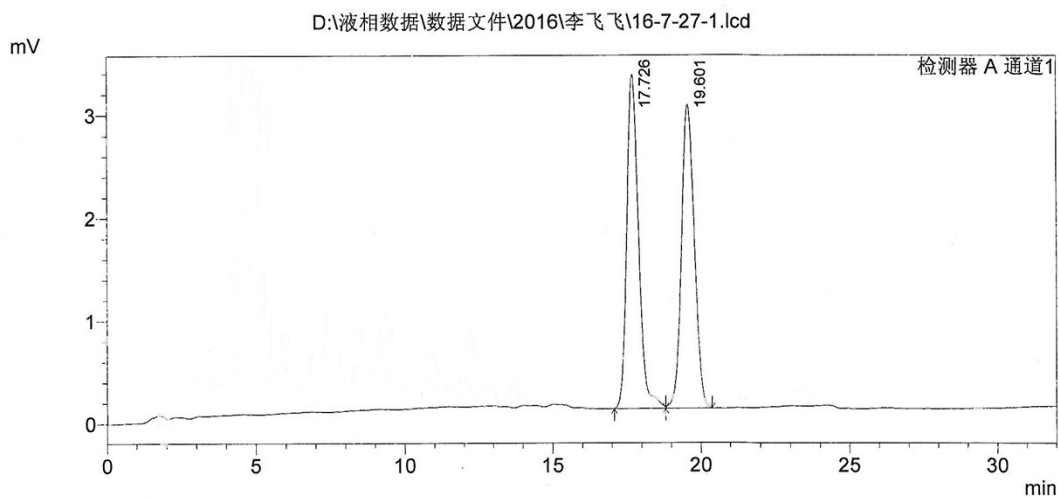

1 检测器 A 通道1/254nm

峰表

| 峰# | 保留时间   | 面积     | 高度   | 面积 %    | 高度 %    |
|----|--------|--------|------|---------|---------|
| 1  | 17.726 | 90379  | 3247 | 50.266  | 52.349  |
| 2  | 19.601 | 89422  | 2955 | 49.734  | 47.651  |
| 总计 |        | 179801 | 6202 | 100.000 | 100.000 |

# ==== Shimadzu LCsolution 分析报告 ====

采集人 : Admin  
 样品名称 : 手性双4  
 样品 ID : 0  
 样品架 : 1  
 样品瓶# : 1  
 进样体积 : 5 uL  
 数据文件名 : 16-7-27-2.lcd  
 方法文件名 : LF反应体系.lcm  
 批处理文件名 :  
 报告文件名 : Default.lcr  
 数据采集 : 2016-7-27 10:28:50  
 数据处理 : 2016-7-27 11:00:07

## <色谱图>

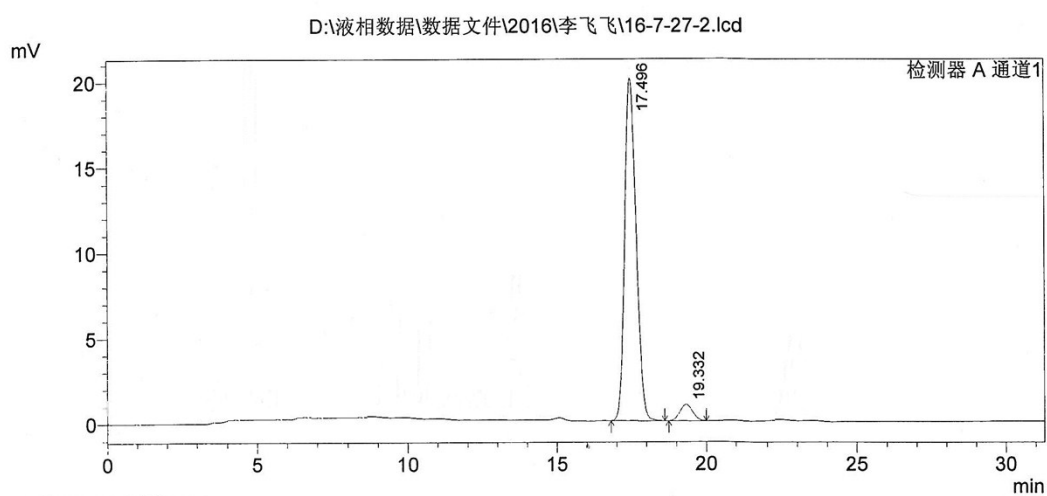

1 检测器 A 通道1/254nm

峰表

检测器 A Ch1 254nm

| 峰# | 保留时间   | 面积     | 高度    | 面积 %    | 高度 %    |
|----|--------|--------|-------|---------|---------|
| 1  | 17.496 | 532874 | 20045 | 95.000  | 95.445  |
| 2  | 19.332 | 28045  | 957   | 5.000   | 4.555   |
| 总计 |        | 560919 | 21002 | 100.000 | 100.000 |



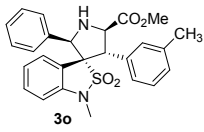

HPLC Conditions: Daicel Chiralpak AD-H, 30% IPA/hexanes, 0.9 mL/min

==== Shimadzu LCsolution 分析报告 ====

采集人 : Admin  
 样品名称 : 双6  
 样品 ID : 0  
 样品架 : 1  
 样品瓶# : 1  
 进样体积 : 5 uL  
 数据文件名 : 16-7-27-5.lcd  
 方法文件名 : LF反应体系.lcm  
 批处理文件名 :  
 报告文件名 : Default.lcr  
 数据采集 : 2016-7-27 12:11:25  
 数据处理 : 2016-7-27 12:36:50

<色谱图>

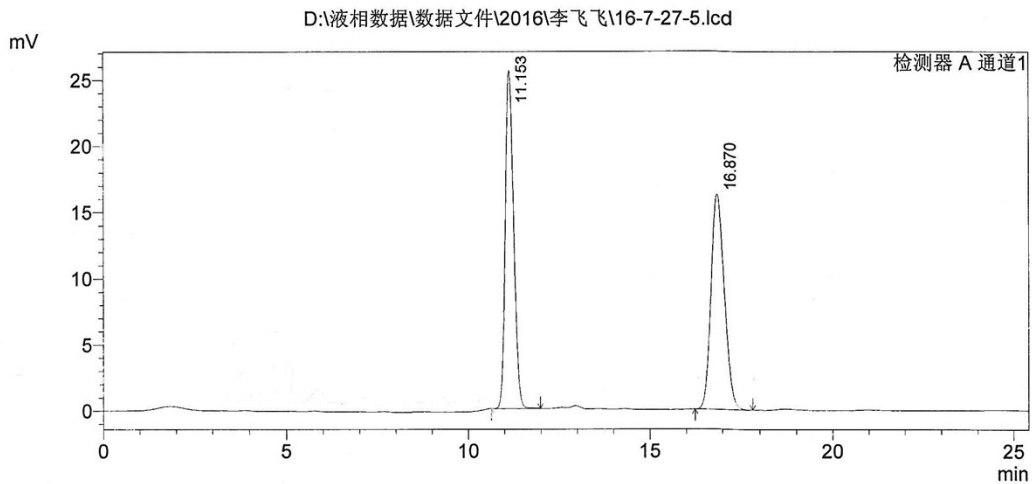

1 检测器 A 通道1/254nm

峰表

| 峰# | 保留时间   | 面积     | 高度    | 面积 %    | 高度 %    |
|----|--------|--------|-------|---------|---------|
| 1  | 11.153 | 407659 | 25536 | 49.997  | 61.102  |
| 2  | 16.870 | 407702 | 16256 | 50.003  | 38.898  |
| 总计 |        | 815361 | 41792 | 100.000 | 100.000 |

==== Shimadzu LCsolution 分析报告 ====

采集人 : Admin  
 样品名称 : 手性双6  
 样品 ID : 0  
 样品架 : 1  
 样品瓶# : 1  
 进样体积 : 5 uL  
 数据文件名 : 16-7-27-6.lcd  
 方法文件名 : LF反应体系.lcm  
 批处理文件名 :  
 报告文件名 : Default.lcr  
 数据采集 : 2016-7-27 12:41:25  
 数据处理 : 2016-7-27 13:07:11

<色谱图>

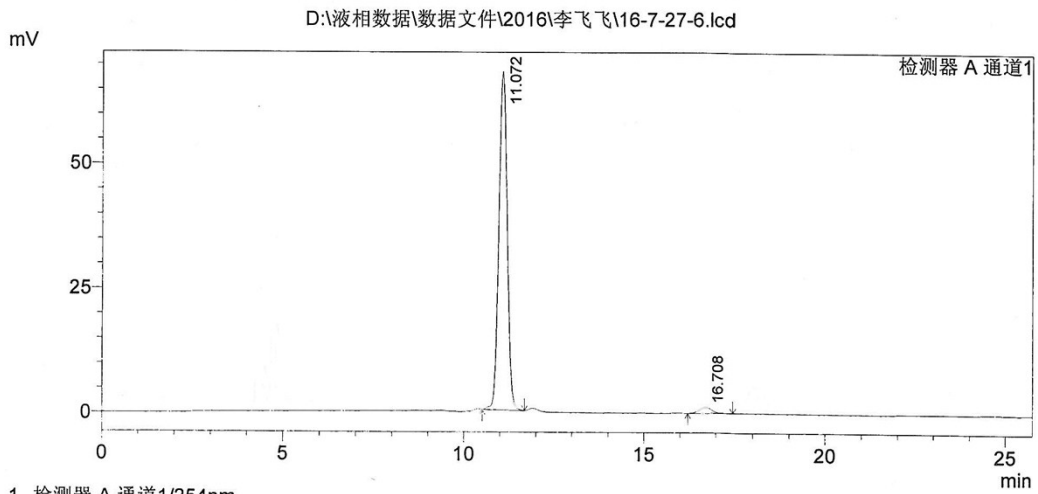

峰表

| 峰# | 保留时间   | 面积      | 高度    | 面积 %    | 高度 %    |
|----|--------|---------|-------|---------|---------|
| 1  | 11.072 | 1083880 | 67995 | 97.343  | 98.292  |
| 2  | 16.708 | 29585   | 1182  | 2.657   | 1.708   |
| 总计 |        | 1113465 | 69176 | 100.000 | 100.000 |

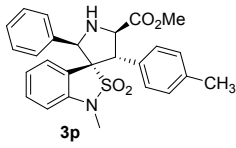

HPLC Conditions: Daicel Chiralpak AD-H, 20% IPA/hexanes, 0.8 mL/min

==== Shimadzu LCsolution 分析报告 ====

采集人 : Admin  
 样品名称 : 双2  
 样品 ID : 0  
 样品架 : 1  
 样品瓶# : 1  
 进样体积 : 5 uL  
 数据文件名 : 16-7-28-1.lcd  
 方法文件名 : LF反应体系.lcm  
 批处理文件名 :  
 报告文件名 : Default.lcr  
 数据采集 : 2016-7-28 10:01:51  
 数据处理 : 2016-7-28 10:52:01

<色谱图>

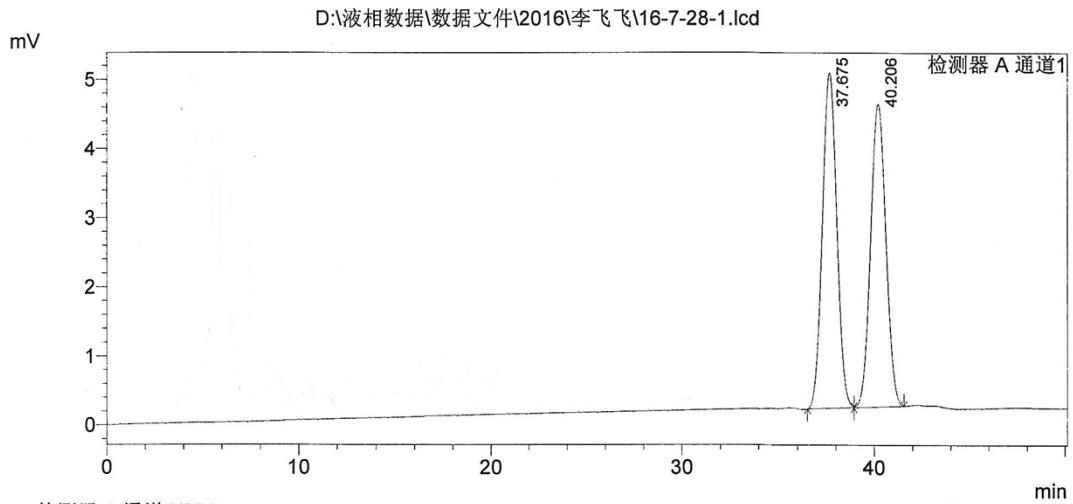

1 检测器 A 通道1/254nm

峰表

| 峰# | 保留时间   | 面积     | 高度   | 面积 %    | 高度 %    |
|----|--------|--------|------|---------|---------|
| 1  | 37.675 | 251928 | 4854 | 50.734  | 52.551  |
| 2  | 40.206 | 244636 | 4382 | 49.266  | 47.449  |
| 总计 |        | 496564 | 9236 | 100.000 | 100.000 |

# ==== Shimadzu LCsolution 分析报告 ====

采集人 : Admin  
 样品名称 : 手性双2  
 样品 ID : 0  
 样品架 : 1  
 样品瓶# : 1  
 进样体积 : 5 uL  
 数据文件名 : 16-7-28-2.lcd  
 方法文件名 : LF反应体系.lcm  
 批处理文件名 :  
 报告文件名 : Default.lcr  
 数据采集 : 2016-7-28 10:57:56  
 数据处理 : 2016-7-28 11:49:03

## <色谱图>

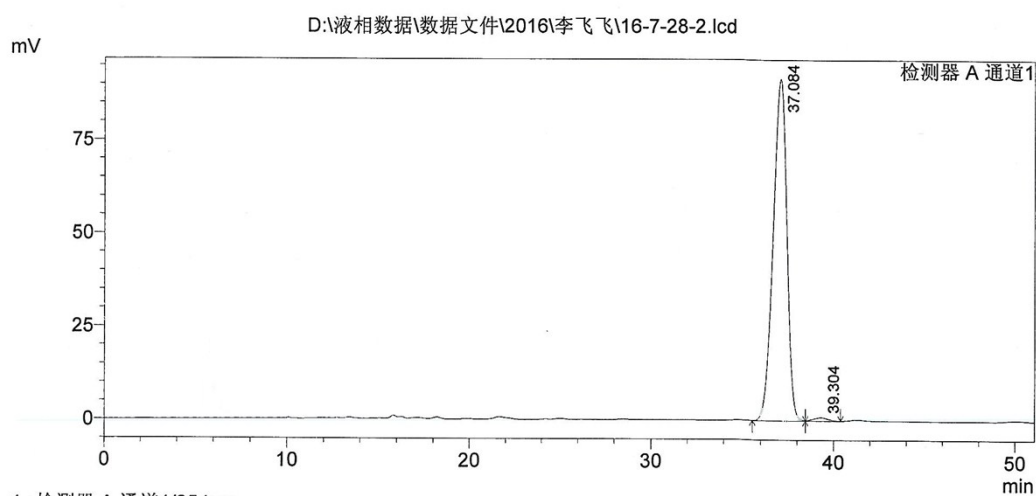

峰表

| 峰# | 保留时间   | 面积      | 高度    | 面积 %    | 高度 %    |
|----|--------|---------|-------|---------|---------|
| 1  | 37.084 | 4798929 | 91495 | 98.974  | 99.031  |
| 2  | 39.304 | 49739   | 895   | 1.026   | 0.969   |
| 总计 |        | 4848669 | 92390 | 100.000 | 100.000 |

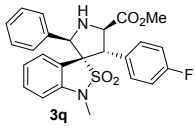

HPLC Conditions: Daicel Chiralpak AD-H, 30% IPA/hexanes, 0.9 mL/min

==== Shimadzu LCsolution 分析报告 ====

采集人 : Admin  
 样品名称 : 双7  
 样品 ID : 0  
 样品架 : 1  
 样品瓶# : 1  
 进样体积 : 5 uL  
 数据文件名 : 16-7-27-7.lcd  
 方法文件名 : LF反应体系.lcm  
 批处理文件名 :  
 报告文件名 : Default.lcr  
 数据采集 : 2016-7-27 13:10:40  
 数据处理 : 2016-7-27 13:44:11

<色谱图>

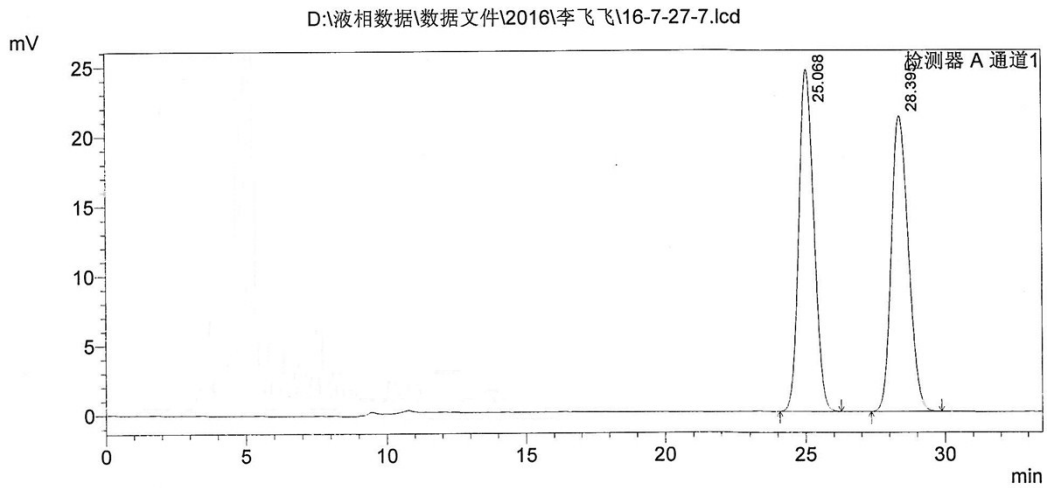

1 检测器 A 通道1/254nm

峰表

| 峰# | 保留时间   | 面积      | 高度    | 面积 %    | 高度 %    |
|----|--------|---------|-------|---------|---------|
| 1  | 25.068 | 918932  | 24548 | 50.198  | 53.658  |
| 2  | 28.395 | 911685  | 21201 | 49.802  | 46.342  |
| 总计 |        | 1830617 | 45750 | 100.000 | 100.000 |

# ==== Shimadzu LCsolution 分析报告 ====

采集人 : Admin  
 样品名称 : 手性双7  
 样品 ID : 0  
 样品架 : 1  
 样品瓶# : 1  
 进样体积 : 5 uL  
 数据文件名 : 16-7-27-9.lcd  
 方法文件名 : LF反应体系.lcm  
 批处理文件名 :  
 报告文件名 : Default.lcr  
 数据采集 : 2016-7-27 14:20:54  
 数据处理 : 2016-7-27 14:54:09

<色谱图>

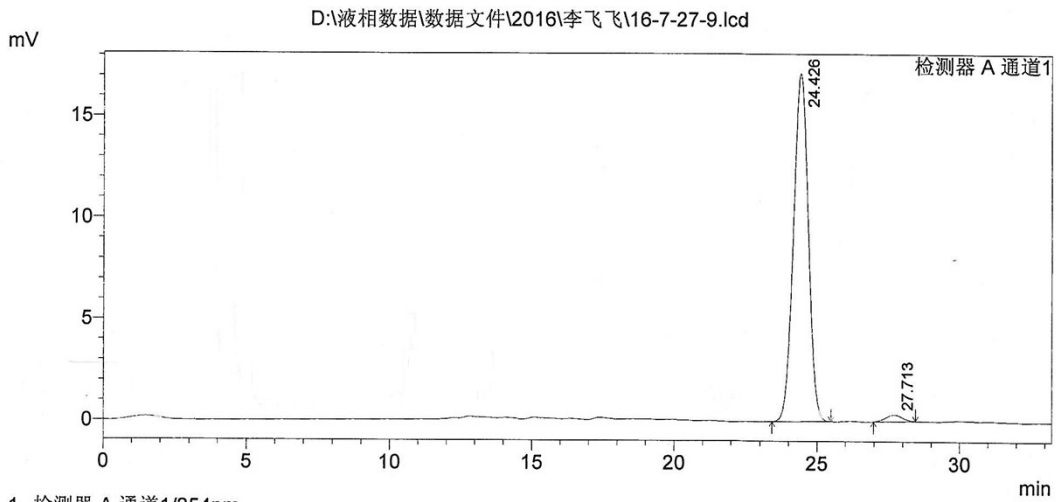

峰表

| 检测器 A Ch1_254nm |        |        |       |         |         |
|-----------------|--------|--------|-------|---------|---------|
| 峰#              | 保留时间   | 面积     | 高度    | 面积 %    | 高度 %    |
| 1               | 24.426 | 623852 | 17131 | 97.902  | 98.097  |
| 2               | 27.713 | 13371  | 332   | 2.098   | 1.903   |
| 总计              |        | 637223 | 17463 | 100.000 | 100.000 |

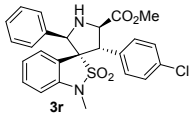

HPLC Conditions: Daicel Chiralpak AD-H, 20% IPA/hexanes, 0.8 mL/min

==== Shimadzu LCsolution 分析报告 ====

采集人 : Admin  
 样品名称 : 双3  
 样品 ID : 0  
 样品架 : 1  
 样品瓶# : 1  
 进样体积 : 5 uL  
 数据文件名 : 16-7-28-3.lcd  
 方法文件名 : LF反应体系.lcm  
 批处理文件名 :  
 报告文件名 : Default.lcr  
 数据采集 : 2016-7-28 11:54:20  
 数据处理 : 2016-7-28 12:58:00

<色谱图>

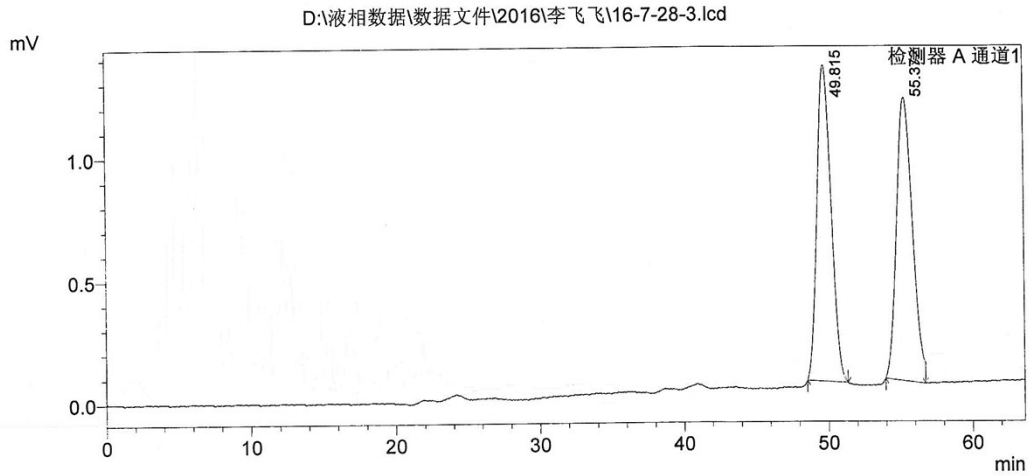

1 检测器 A 通道1/254nm

峰表

| 峰# | 保留时间   | 面积     | 高度   | 面积 %    | 高度 %    |
|----|--------|--------|------|---------|---------|
| 1  | 49.815 | 87044  | 1288 | 49.554  | 52.753  |
| 2  | 55.372 | 88610  | 1154 | 50.446  | 47.247  |
| 总计 |        | 175654 | 2442 | 100.000 | 100.000 |

==== Shimadzu LCsolution 分析报告 ====

采集人 : Admin  
 样品名称 : 手性双3  
 样品 ID : 0  
 样品架 : 1  
 样品瓶# : 1  
 进样体积 : 5 uL  
 数据文件名 : 16-7-28-4.lcd  
 方法文件名 : LF反应体系.lcm  
 批处理文件名 :  
 报告文件名 : Default.lcr  
 数据采集 : 2016-7-28 13:03:42  
 数据处理 : 2016-7-28 14:07:06

<色谱图>

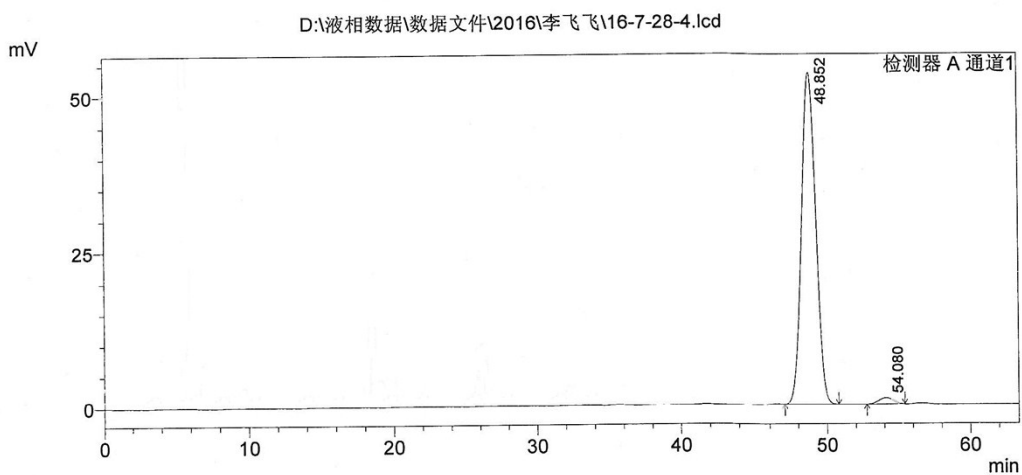

1 检测器 A 通道1/254nm

峰表

| 峰# | 保留时间   | 面积      | 高度    | 面积 %    | 高度 %    |
|----|--------|---------|-------|---------|---------|
| 1  | 48.852 | 3646455 | 53342 | 98.014  | 98.110  |
| 2  | 54.080 | 73901   | 1027  | 1.986   | 1.890   |
| 总计 |        | 3720357 | 54369 | 100.000 | 100.000 |



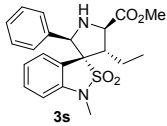

HPLC Conditions: Daicel Chiralpak AD-H, 30% IPA/hexanes, 0.9 mL/min

==== Shimadzu LCsolution 分析报告 ====

采集人 : Admin  
 样品名称 : 双5  
 样品 ID : 0  
 样品架 : 1  
 样品瓶# : 1  
 进样体积 : 5 uL  
 数据文件名 : 16-7-27-3.lcd  
 方法文件名 : LF反应体系.lcm  
 批处理文件名 :  
 报告文件名 : Default.lcr  
 数据采集 : 2016-7-27 11:07:08  
 数据处理 : 2016-7-27 11:34:53

<色谱图>

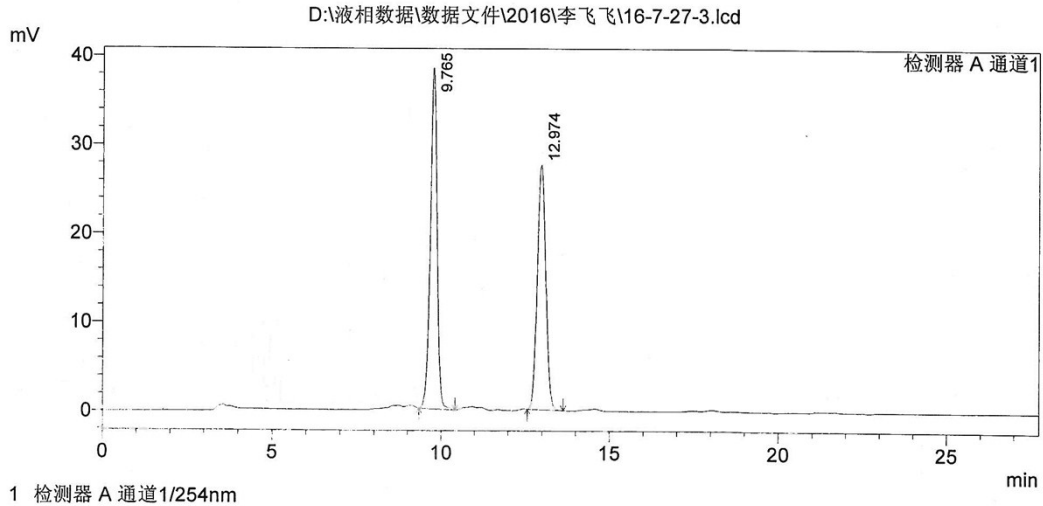

峰表

| 峰# | 保留时间   | 面积      | 高度    | 面积 %    | 高度 %    |
|----|--------|---------|-------|---------|---------|
| 1  | 9.765  | 544131  | 38401 | 52.928  | 58.227  |
| 2  | 12.974 | 483927  | 27550 | 47.072  | 41.773  |
| 总计 |        | 1028058 | 65951 | 100.000 | 100.000 |

# ==== Shimadzu LCsolution 分析报告 ====

采集人 : Admin  
 样品名称 : 手性双5  
 样品 ID : 0  
 样品架 : 1  
 样品瓶# : 1  
 进样体积 : 5 uL  
 数据文件名 : 16-7-27-4.lcd  
 方法文件名 : LF反应体系.lcm  
 批处理文件名 :  
 报告文件名 : Default.lcr  
 数据采集 : 2016-7-27 11:40:50  
 数据处理 : 2016-7-27 12:06:31

## <色谱图>

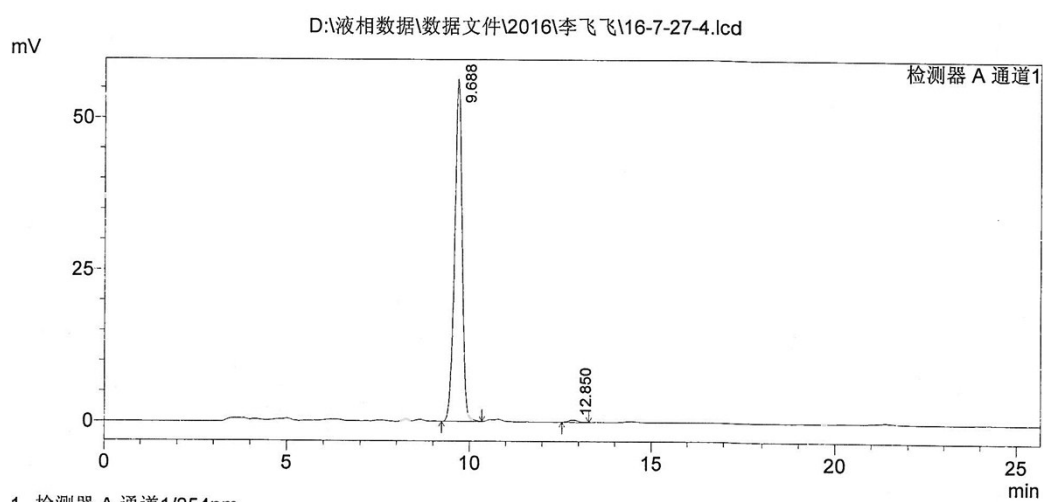

峰表

| 检测器 A Ch1 254nm |        |        |       |         |         |
|-----------------|--------|--------|-------|---------|---------|
| 峰#              | 保留时间   | 面积     | 高度    | 面积 %    | 高度 %    |
| 1               | 9.688  | 815039 | 56422 | 99.161  | 99.315  |
| 2               | 12.850 | 6897   | 389   | 0.839   | 0.685   |
| 总计              |        | 821936 | 56811 | 100.000 | 100.000 |

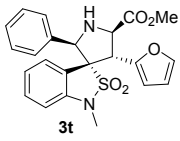

HPLC Conditions: Daicel Chiralpak AD-H, 20% IPA/hexanes, 0.8 mL/min

==== Shimadzu LCsolution 分析报告 ====

采集人 : Admin  
 样品名称 : 双8  
 样品 ID : 0  
 样品架 : 1  
 样品瓶# : 1  
 进样体积 : 5 uL  
 数据文件名 : 16-7-28-5.lcd  
 方法文件名 : LF反应体系.lcm  
 批处理文件名 :  
 报告文件名 : Default.lcr  
 数据采集 : 2016-7-28 14:11:41  
 数据处理 : 2016-7-28 14:59:36

<色谱图>

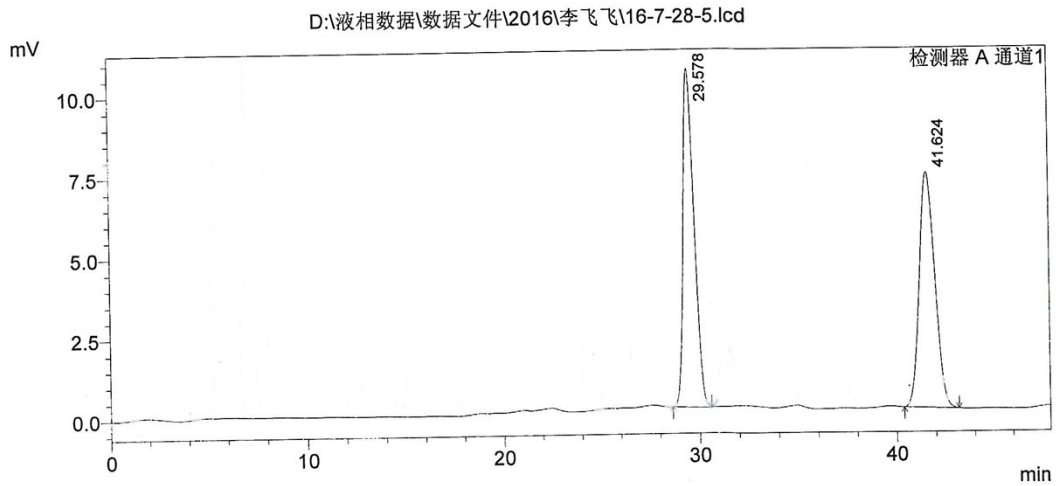

1 检测器 A 通道1/254nm

峰表

| 峰# | 保留时间   | 面积     | 高度    | 面积 %    | 高度 %    |
|----|--------|--------|-------|---------|---------|
| 1  | 29.578 | 406838 | 10485 | 50.296  | 59.001  |
| 2  | 41.624 | 402056 | 7286  | 49.704  | 40.999  |
| 总计 |        | 808894 | 17771 | 100.000 | 100.000 |

## ==== Shimadzu LCsolution 分析报告 ====

采集人 : Admin  
 样品名称 : 手性双8  
 样品 ID : 0  
 样品架 : 1  
 样品瓶# : 1  
 进样体积 : 5 uL  
 数据文件名 : 16-7-28-6.lcd  
 方法文件名 : LF反应体系.lcm  
 批处理文件名 :  
 报告文件名 : Default.lcr  
 数据采集 : 2016-7-28 15:03:52  
 数据处理 : 2016-7-28 15:50:50

<色谱图>

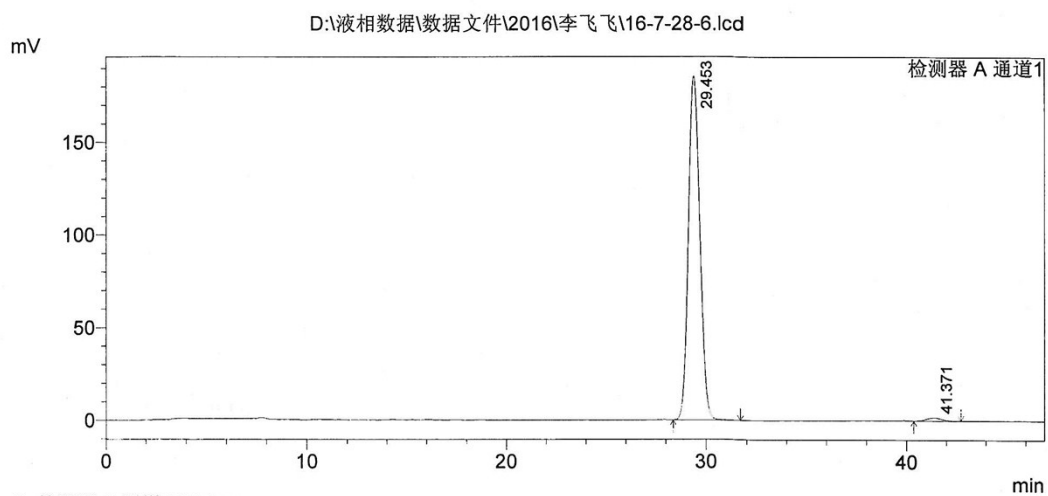

峰表

| 峰# | 保留时间   | 面积      | 高度     | 面积 %    | 高度 %    |
|----|--------|---------|--------|---------|---------|
| 1  | 29.453 | 7333539 | 185718 | 98.739  | 99.066  |
| 2  | 41.371 | 93635   | 1751   | 1.261   | 0.934   |
| 总计 |        | 7427175 | 187469 | 100.000 | 100.000 |
